1 Long-term live imaging of epithelial organoids and corresponding multiscale  
2 analysis reveal high heterogeneity and identifies core regulatory principles

3  
4

5 Lotta Hof<sup>1\*</sup>, Till Moreth<sup>1\*</sup>, Michael Koch<sup>1</sup>, Tim Liebisch<sup>2</sup>, Marina Kurtz<sup>3</sup>, Julia Tarnick<sup>4</sup>, Susanna  
6 M. Lissek<sup>5</sup>, Monique M.A. Verstegen<sup>6</sup>, Luc J.W. van der Laan<sup>6</sup>, Meritxell Huch<sup>7</sup>, Franziska  
7 Matthäus<sup>2</sup>, Ernst H.K. Stelzer<sup>1</sup>, Francesco Pampaloni<sup>1§</sup>

8

9 <sup>1</sup>Physical Biology Group, Buchmann Institute for Molecular Life Sciences (BMLS), Goethe-  
10 Universität Frankfurt am Main, Frankfurt am Main, Germany

11 <sup>2</sup>Faculty of Biological Sciences & Frankfurt Institute for Advanced Studies (FIAS), Goethe-  
12 Universität Frankfurt am Main, Frankfurt am Main, Germany

13 <sup>3</sup>Department of Physics & Frankfurt Institute for Advanced Studies (FIAS), Goethe-Universität  
14 Frankfurt am Main, Frankfurt am Main, Germany

15 <sup>4</sup>Deanery of Biomedical Science, University of Edinburgh, Edinburgh, United Kingdom

16 <sup>5</sup>Experimental Medicine and Therapy Research, University of Regensburg, Regensburg,  
17 Germany

18 <sup>6</sup>Department of Surgery, Erasmus MC – University Medical Center, Rotterdam, The  
19 Netherlands

20 <sup>7</sup>The Wellcome Trust/CRUK Gurdon Institute, University of Cambridge, Cambridge, United  
21 Kingdom. Present address: Max Planck Institute of Molecular Cell Biology and Genetics,  
22 Dresden, Germany

23 \*contributed equally

24 §corresponding author: f.pampalo@bio.uni-frankfurt.de

## 25 Abstract

26 Organoids are morphologically heterogeneous three-dimensional cell culture systems. To  
27 understand the cell organisation principles of their morphogenesis, we imaged hundreds of  
28 pancreas and liver organoids in parallel using light sheet and bright field microscopy for up to  
29 seven days. We quantified organoid behaviour at single-cell (microscale), individual-organoid  
30 (mesoscale), and entire-culture (macroscale) levels. At single-cell resolution, we monitored  
31 formation, monolayer polarisation and degeneration, and identified diverse behaviours,  
32 including lumen expansion and decline (size oscillation), migration, rotation and multi-organoid  
33 fusion. Detailed individual organoid quantifications lead to a mechanical 3D agent-based  
34 model. A derived scaling law and simulations support the hypotheses that size oscillations  
35 depend on organoid properties and cell division dynamics, which is confirmed by bright field  
36 macroscale analyses of entire cultures. Our multiscale analysis provides a systematic picture  
37 of the diversity of cell organisation in organoids by identifying and quantifying core regulatory  
38 principles of organoid morphogenesis.

39 Graphical Abstract

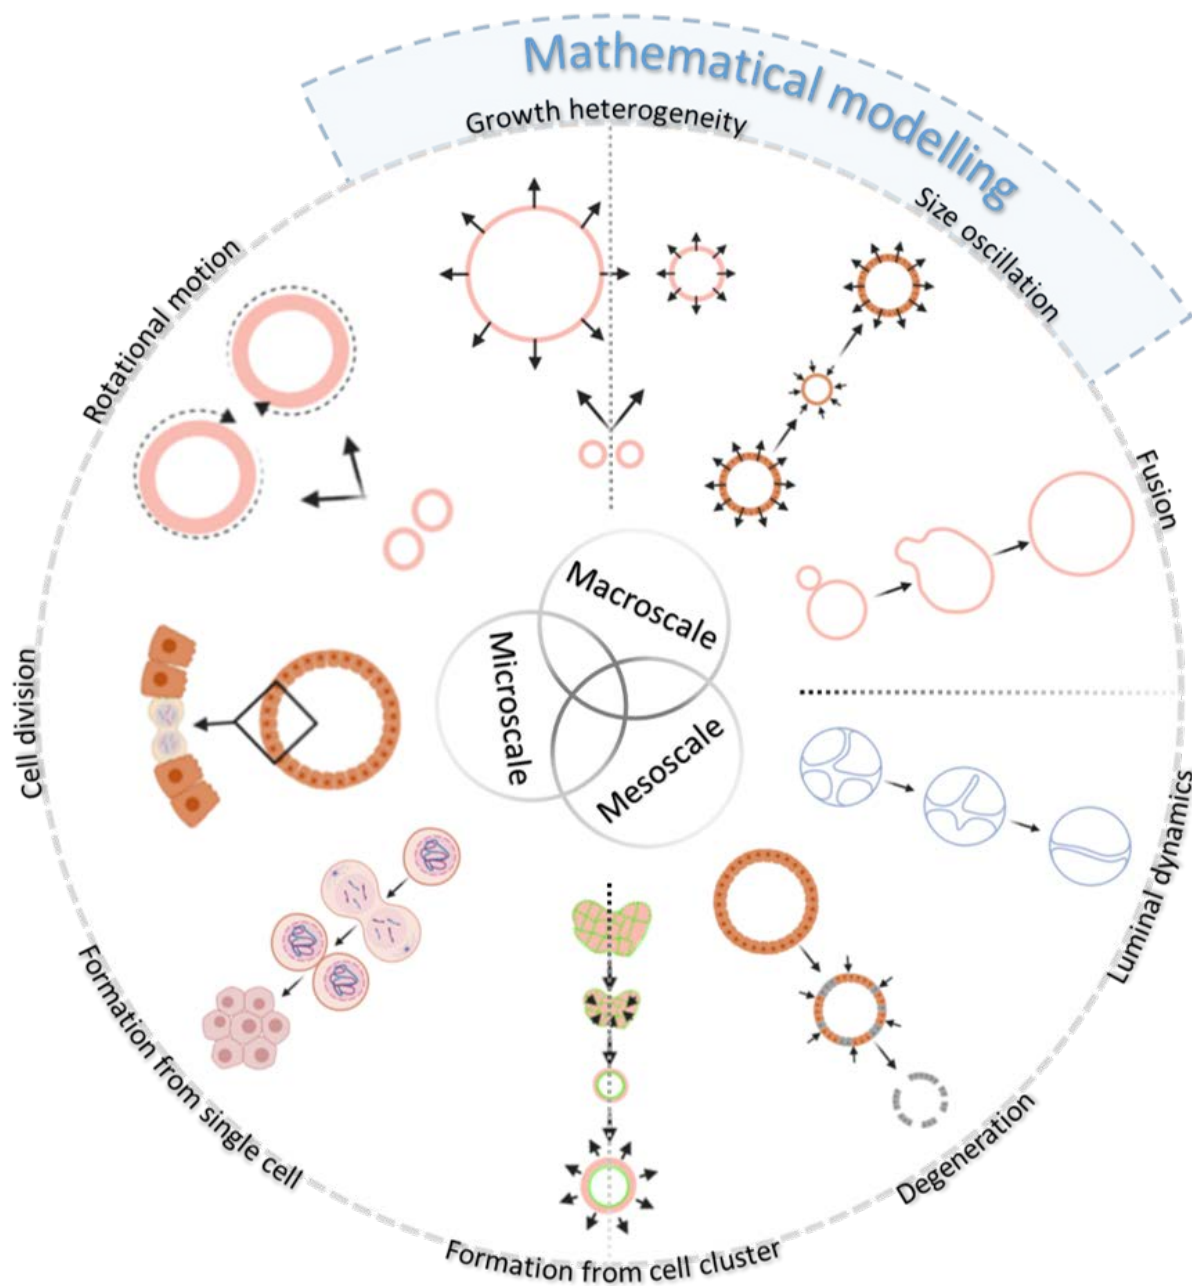

40

41 Created with BioRender.com.

## 42 Introduction

43 Understanding the principles of collective cell behaviour in mammalian organs during  
44 development, homeostasis, regeneration and pathogenesis requires simplified models  
45 mimicking the *in vivo* cell-cell and cell-matrix interactions. To this aim, organoids provide an  
46 ideal *in vitro* model. Organoids are three-dimensional (3D) cultures obtained from pluripotent  
47 stem cells (embryonic or induced pluripotent stem cells) or organ-derived adult stem cells  
48 (Clevers, 2016). Organoid systems recapitulating the brain and the majority of epithelial organs  
49 have been established. These systems reproduce aspects of organ-specific development and  
50 disease (Kretzschmar et al., 2016; Lancaster et al., 2019) and are valuable for personalised  
51 (Broutier et al., 2017; de Winter-De Groot et al., 2018) and regenerative medicine (Takeda et  
52 al., 2013). Multicellular self-organisation determines organoid behaviour and morphology. For  
53 instance, epithelial organoids can acquire a spherical (“monocystic” (**Box 1**)), budding  
54 (“branched”), but also a dense (“polycystic” (**Box 1**)) phenotype (Loomans et al., 2018; Serra  
55 et al., 2019). Organoids are therefore a valid model to understand the principles of tissue self-  
56 organisation at the mesoscale, which are largely unknown (Treat et al., 2018).

57 In order to fill this knowledge gap, a quantitative analysis at single-cell resolution is essential.  
58 A multiscale approach is required, capturing the cell-to-cell variability while monitoring the  
59 entire organoid system (Xavier da Silveira dos Santos et al., 2019) (**Box 1**).

60 The advancement of molecular biology allows quantifications of large-scale omics data at  
61 single-cell resolution. For example, high-throughput single-cell transcriptomics detect rare cell  
62 populations and trajectories between distinct cell lineages (Grün et al., 2015). Unlike most  
63 single-cell molecular characterisations, time-resolved advanced microscopy enables both  
64 spatio-temporal analysis of the organoids’ global morphology as well as “zooming-in” on the  
65 fates of a single cell. In previous studies, Bolhaquero *et al.* (Bolhaquero et al., 2019) were  
66 able to combine single-cell molecular and image-based analyses and proved chromosome  
67 segregation errors with up to 18 hours long image acquisitions in a confocal microscope. In an  
68 approach using an inverted light sheet microscope, Serra *et al.* (Serra et al., 2019) were able  
69 to perform 5-day long live acquisitions of individual organoids.

70 Ultimately, the experimental quantitative data on organoid dynamics should serve as a  
71 foundation for mathematical models, which predict the experimental outcome and test  
72 hypotheses about underlying mechanisms of observed behaviours by altering controllable  
73 parameters *in silico* (Sasai, 2013).

74 In our study, we focus on two types of organoids initiated from adult progenitor cells of the  
75 pancreas and liver tumour as representatives for a spherical as well as a polycystic phenotype.  
76 Murine pancreas-derived organoids (mPOs), are used as a model to study pancreas  
77 development and the regeneration of pancreatic  $\beta$ -cells (Huch *et al.*, 2013). Human  
78 cholangiocarcinoma-derived organoids (hCCOs), are promising models to study personalised

79 treatment of primary liver cancer (Broutier et al., 2017). So far, the morphology of these  
80 organoids was analysed qualitatively by immuno-fluorescent marker localisation and bright  
81 field observations at single time points.

82 Here, in order to assess cellular dynamics in organoid cultures and identify their morphological  
83 organisational principles, we developed two complementary image-based analysis pipelines  
84 covering multiple scales: (1) A “Light sheet pipeline”, based on light sheet-based fluorescence  
85 microscopy (LSFM), addressing the micro- (single cell) and the mesoscale (individual  
86 organoid). (2) A “Bright field pipeline”, based on bright field microscopy, accessing both the  
87 meso- and macroscale (entire organoid culture) (**Supplementary Figure 1**).

88 The light sheet pipeline relies on image acquisition with the Lightsheet Z.1 (Zeiss) microscope,  
89 for which we further developed a custom FEP-foil cuvette (Hötte et al., 2019) (*further referred*  
90 *to as Z1-FEP-cuvette*, **Box 1**) as sample holder. Based on tagging cells with fluorescent fusion-  
91 proteins, this setup allowed for observations of cellular dynamics in live epithelial organoid  
92 cultures for up to seven days while retaining optimal physiological conditions (3D ECM  
93 environment, precisely defined medium, constant pH, and controlled temperature). Primary  
94 cell cultures, such as organoids, require minimal exposure to phototoxic effects, which is given  
95 by low energy exposure, due to a fast image acquisition as well as z-plane-confined  
96 illumination in LSFM (Keller et al., 2008; Stelzer, 2015). The confined illumination also yields  
97 a higher axial resolution compared to other microscopy systems, while still facilitating the  
98 acquisition of a large samples (Greger et al., 2007; Verveer et al., 2007). These features enable  
99 us to monitor large numbers of organoids simultaneously (approx. 100-200 organoids,  
100 depending on seeding density) in a maximum volume of about 8 mm<sup>3</sup>. Next to the detailed  
101 visualisation of highly dynamic processes during organoid formation, the data acquired by  
102 LSFM allow for tracking, extraction and quantification of several organoid features, including  
103 cell number and organoid volume at the micro- and mesoscale.

104 Based on the quantitative data obtained from the light sheet pipeline (cell count and cell  
105 division rates), we developed a 3D agent-based model (**Box 1**) to investigate the underlying  
106 mechanics driving single-organoid behaviour. Such models provide a technique to represent  
107 a wet-lab experiment under idealised conditions (Karolak et al., 2018). In contrast to the basic  
108 mechanisms proposed by the model of Ruiz-Herrero *et al.* (Ruiz-Herrero et al., 2017), which  
109 describes the dimensionless radius for hydraulically gated oscillations in spherical systems,  
110 we built a full elastic 3D model, based on the core principles formulated in Stichel *et al.* (Stichel  
111 et al., 2017). We expect organoids to have a similar morphogenic behaviour to other 3D-cell  
112 cultures, such as MDCK-cysts and epithelial tissues, namely, they grow by mitosis, display an  
113 apical-basal polarisation (Odenwald et al., 2017) and secrete osmotically active substances  
114 into their lumen (Ishiguro et al., 2012). Further, we assume that neighbouring cells are tightly

115 connected via cell-cell junctions (Harris et al., 2010) and the cell layer ruptures if the internal  
116 pressure reaches a critical point.

117 The single-cell resolution achieved by the light sheet pipeline is necessary for studying single-  
118 cell dynamics and collective cell dynamics in individual organoids in depth. However, the large  
119 amounts of data acquired by this pipeline require considerable computational resources, which  
120 hinder the extraction and quantification of macroscale (entire organoid culture) features. We  
121 therefore developed the bright field pipeline that measures luminal size changes at individual-  
122 organoid resolution based on projected luminal areas (**Box 1**). This pipeline enables the  
123 observation of entire organoid cultures (approx. 100-200 organoids within 25  $\mu$ l ECM droplets,  
124 depending on seeding density) over several days while retaining optimal physiological  
125 conditions. In addition, the bright field setup allows label-free image acquisition, which ensures  
126 minimal exposure to phototoxic effects. Quantification of the projected luminal areas over time  
127 yields features on a mesoscale level, such as minimal and maximal area of individual  
128 organoids, which are used to determine the median area increase of the entire culture at the  
129 macroscale level.

130 Our light sheet data indicate that epithelial organoids show size oscillations (expansion and  
131 decline phases) (**Box 1**), which are frequently observed in small organoids (diameter < 400  
132  $\mu$ m), but much less in large organoids (diameter > 400  $\mu$ m). This is reflected in our 3D agent-  
133 based model, which indicates the size oscillations arise in response to an interplay of an  
134 increase of the internal pressure, the cell division dynamics and the mechanical properties of  
135 the single cells. The critical internal pressure due to release of osmotically active substances  
136 into the lumen is reached earlier in organoids with increased surface-to-volume ratios (small  
137 organoids) compared to organoids with reduced surface-to-volume ratios (large organoids).  
138 We further verified these findings by quantifying the size oscillations in entire organoid cultures  
139 using the bright field pipeline.

140 In summary, our approach reveals the dynamics of organoid cultures from single-cell and  
141 single-organoid scale to the complete culture scale, ascertaining the core regulatory principles  
142 (**Box 1**) of their multicellular behaviour.

## 143 Results

144

145 Long-term live imaging with LSFM allows detailed visualisation of dynamic processes in  
146 organoid morphogenesis and reveals high heterogeneity in single-cell and individual-  
147 organoid behaviour.

148 To gain deeper insights into the dynamic cellular processes occurring within organoid systems,  
149 we developed Z1-FEP-cuvette holders for live imaging with the Zeiss Lightsheet Z.1  
150 microscope system (**Supplementary Figure 2**). As previously described (Hötte et al., 2019),  
151 ultra-thin FEP-foil cuvettes are sample holders for LSFM which preserve physiological culture  
152 conditions for organoid cultures and allow the acquisition of high resolution images at single-  
153 cell level. Using the Z1-FEP-cuvette, we recorded the formation and development of hCCOs  
154 expressing H2B-eGFP (nuclei marker) and LifeAct-mCherry (F-actin cytoskeleton marker) and  
155 mPOs expressing Rosa26-nTnG (nuclei marker) for up to seven days. The medium was  
156 exchanged every 48 hours to ensure sufficient nutrient supply. Temperature and CO<sub>2</sub> levels  
157 were controlled to ensure optimal growth conditions (**Supplementary Figures 3, 4**). The setup  
158 enabled us to monitor dynamic processes at high temporal and spatial resolution in up to 120  
159 organoids simultaneously contained in one Z1-FEP-cuvette (in this example in a total volume  
160 of 5.2 mm<sup>3</sup> of technically possible 8 mm<sup>3</sup>) (**Supplementary Figure 5a; Supplementary Movie**  
161 **1**). The images acquired by LSFM allow for detailed qualitative inspections and detailed feature  
162 tracking of several dynamic cellular processes at single-cell resolution (**Supplementary Movie**  
163 **2**).

164 Visual inspection of the acquired data revealed that the initially seeded organoid cell clusters  
165 contract before the cells within the clusters start to rearrange and form spherical structures  
166 (**Figure 1, Formation**). The cells within these spherical structures begin to polarise and form  
167 a lumen (in this example around 13.5 hours), indicated by a stronger F-actin signal at the apical  
168 (luminal) side of the cell membranes. Potentially dead cells accumulate within the lumen,  
169 indicated by loss of the LifeAct-mCherry signal and by smaller nuclei with stronger H2B-eGFP  
170 signals, hinting towards apoptotic nuclear condensation (Mandelkow et al., 2017). The  
171 polarisation of cells in the epithelial monolayer is maintained during luminal expansion and is  
172 still clearly visible at later stages of organoid development (in this example around 41.0 hours)  
173 (**Figure 1, Polarisation**). The recording interval of 30 minutes, also allows us to visually track  
174 single cell division events (here: over a time course of 2.5 hours) (**Figure 1, Cell division**). We  
175 were also able to observe polarisation and cell division events in isolated single cells  
176 (**Supplementary Figure 5b**), which remained dormant for relatively long periods during  
177 observation. We identified an overall shrinking of the organoid, nuclear condensation and a  
178 fading nuclei signal to be hallmarks of organoid degeneration (**Box 1**) (**Figure 1,**

179 **Degeneration; Supplementary Movie 1).** This process is initiated upon extended culturing  
180 without further medium exchange (here: after about 100 hours).

181 Image-based segmentation and three-dimensional (3D) volume rendering of the acquired data  
182 allow for even more detailed inspections of features observed in the highly dynamic organoid  
183 system. While most processes can already be followed in maximum intensity z-projections of  
184 the acquired image data, 3D volume rendering facilitates a more detailed understanding of the  
185 underlying cellular dynamics from different perspectives. We identified organoid fusion to be a  
186 frequent phenomenon in the investigated cultures (**Figure 2, Fusion; Supplementary Movie**  
187 **3**). After the epithelial monolayers of both organoids touch each other, they initiate an opening  
188 connecting both lumens. This opening then expands while cells migrate into one connected  
189 monolayer. Similar dynamics of cells migrating into one connected monolayer were observed  
190 in the formation, subsequent retraction and eventual rupture of duct-like structures within the  
191 lumen of a large organoid (diameter:  $\geq 500 \mu\text{m}$ ), which presumably emerged from fusion of  
192 multiple organoids (**Box 1**) (**Figure 2, Luminal dynamics – lower panel; Supplementary**  
193 **Movies 4, 5**). Volume rendering of cell nuclei revealed that small organoids (diameter at end  
194 of observation (48 hours):  $100 \mu\text{m}$ ) with large nuclei (longest axis:  $52 \mu\text{m}$ ) show less cell  
195 divisions and overall less cell movement than larger organoids (diameter at end of observation  
196 (48 hours):  $180 \mu\text{m}$ ) with smaller nuclei (longest axis:  $32 \mu\text{m}$ ) (**Supplementary Movie 6**). This  
197 further underline the heterogeneity in the investigated organoid systems.

198 The observed heterogenic dynamic processes in organoids and organoid systems were  
199 quantitatively described using feature extraction and feature tracking tools. Single-cell tracking  
200 revealed that the previously observed cell movement in larger organoids with smaller cell nuclei  
201 can be described as a uniform rotation of the epithelial cell monolayer (**Figure 2, Rotation;**  
202 **Supplementary Movies 5, 6**).

203 Single-cell tracking also revealed that the cells within an organoid move with different speeds  
204 during organoid expansion. Cells at the organoid's "poles" tend to show less or slower  
205 movement ( $2 \mu\text{m}$  per hour) compared to cells located at the organoid's equatorial plane ( $7 \mu\text{m}$   
206 per hour) (**Supplementary Movie 7**). Furthermore, we observed that prior to organoid  
207 formation, some of the initially seeded cell clusters migrate through the ECM before they start  
208 to form a spherical structure (**Supplementary Movie 8**). In this example, the cell cluster travels  
209 at an average speed of  $10 \mu\text{m}$  per hour (maximum speed:  $23 \mu\text{m}$  per hour), covering a distance  
210 of about  $250 \mu\text{m}$  in total.

211

212



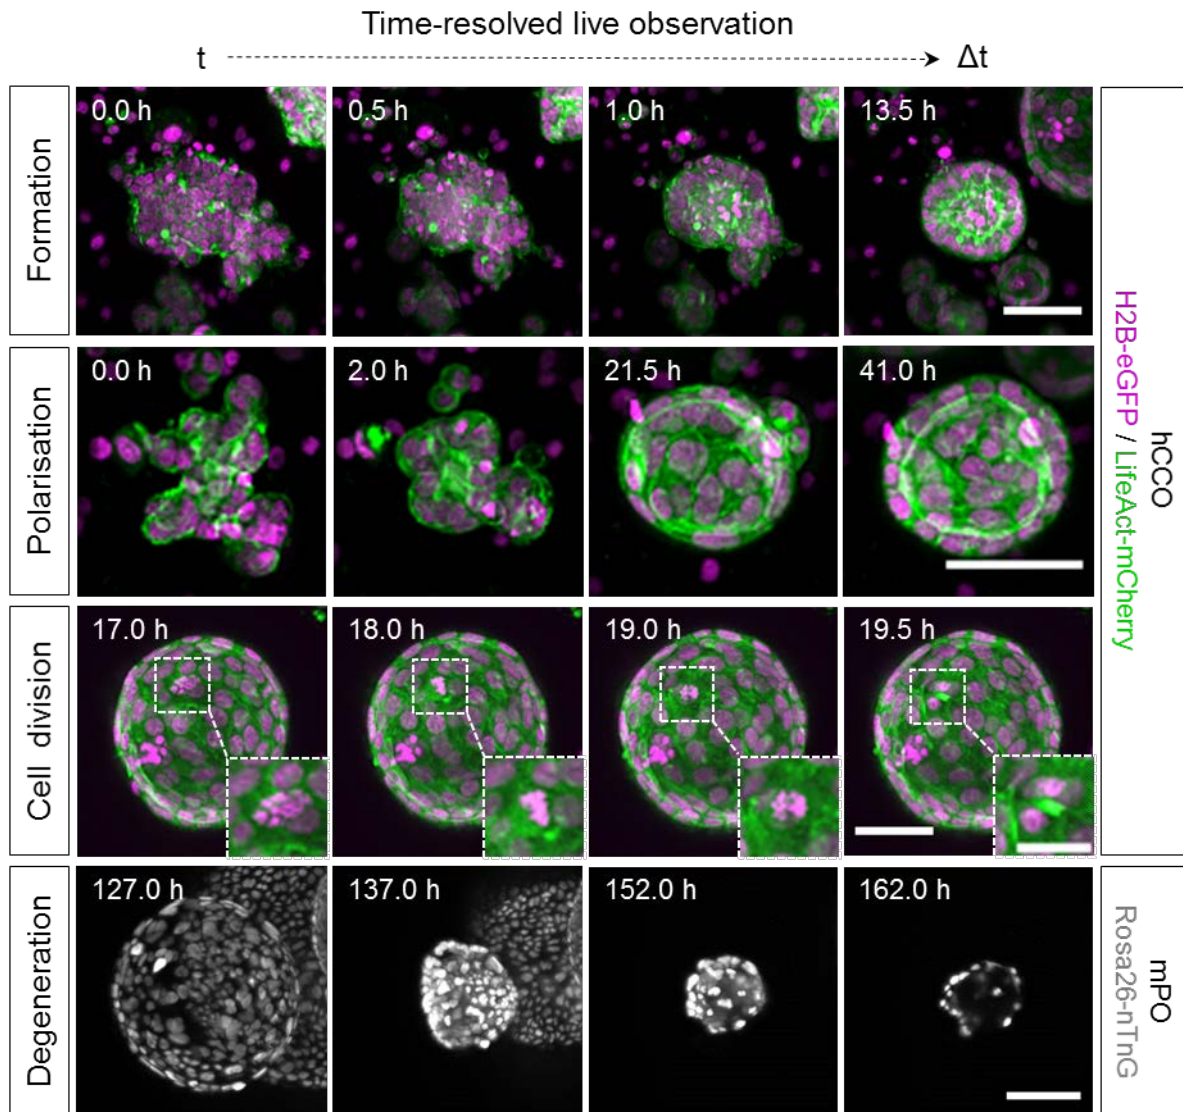

213

214 **Figure 1: Time-resolved live LSFM recordings provide data for detailed qualitative**  
215 **inspections of dynamic morphological processes in organoid development.** hCCOs and  
216 mPOs were seeded into Z1-FEP-cuvettes for long-term live observations. They expressed the  
217 nuclei marker H2B-eGFP (magenta) or Rosa26-nTnG (grey) and the F-actin cytoskeletal  
218 marker LifeAct-mCherry (green). About 120 organoids were recorded in image stacks up to  
219 900 z-planes deep for at most seven days. The figure shows excerpts of maximum intensity z-  
220 projections. Microscope: Zeiss Lightsheet Z.1; objective lenses: detection: W Plan-Apochromat  
221 20x/1.0, illumination: Zeiss LSFM 10x/0.2; laser lines: 488 nm, 561 nm; filters: laser block filter  
222 (LBF) 405/488/561; voxel size: 1.02 x 1.02 x 2.00  $\mu\text{m}^3$ ; recording interval: 30 min; scale bars:  
223 50  $\mu\text{m}$ , 25  $\mu\text{m}$  (inset).

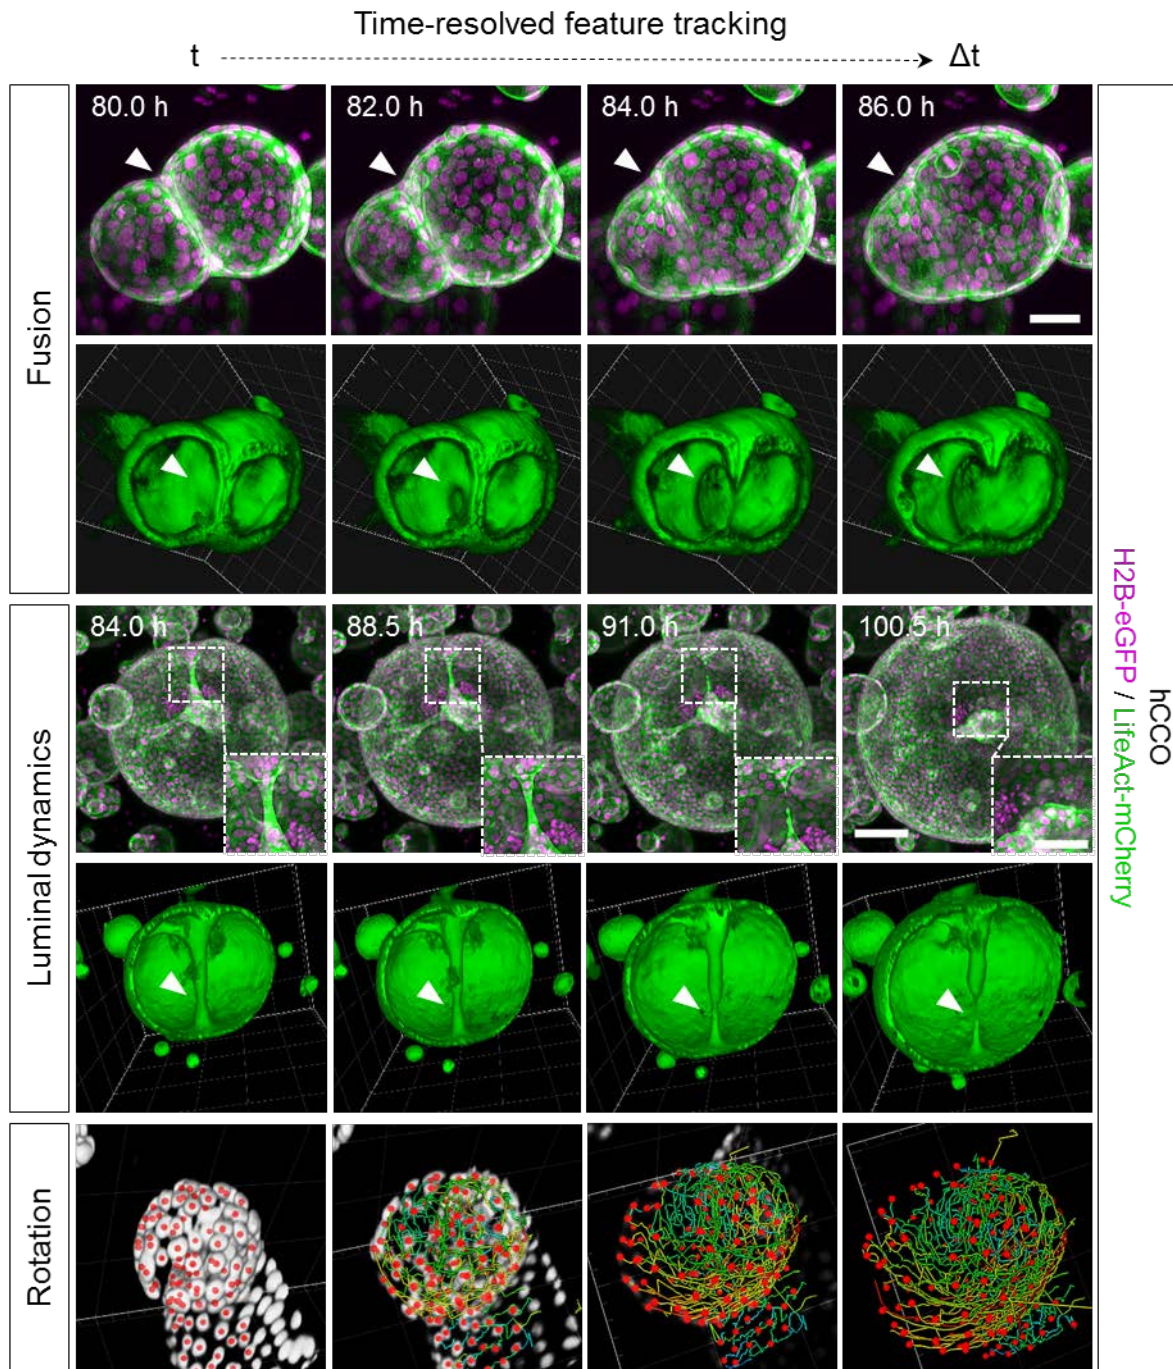

224

225 **Figure 2: High-quality live LSFM image data provide an excellent basis for volume**  
 226 **rendering and detailed feature tracking for the quantitative description of cellular**  
 227 **dynamics in organoid development.** 3D renderings offer detailed views into processes such  
 228 as organoid fusion and elucidate the spatial context in observed luminal dynamics. 3D cell  
 229 tracking reveals the complex rotation of the epithelial cell monolayer. hCCOs (seeded and  
 230 maintained in Z1-FEP-cuvettes) expressed the nuclei marker H2B-eGFP (magenta) and the  
 231 F-actin cytoskeletal marker LifeAct-mCherry (green). The figure shows segmented and tracked  
 232 cell nuclei (Rotation; centroids – red; tracks – rainbow), excerpts of maximum intensity z-  
 233 projections and 3D renderings of corresponding data sets. Segmentation, tracking and 3D  
 234 rendering were performed with Arivis Vision4D. Microscope: Zeiss Lightsheet Z.1; objective  
 235 lenses: detection: W Plan-Apochromat 20x/1.0, illumination: Zeiss LSFM 10x/0.2; laser lines:  
 236 488 nm, 561 nm; filters: laser block filter (LBF) 405/488/561; voxel size: 1.02 x 1.02 x 2.00  
 237  $\mu\text{m}^3$ ; recording interval: 30 min; scale bars: Fusion - 50  $\mu\text{m}$ , Luminal dynamics – 100  $\mu\text{m}$ , 50  
 238  $\mu\text{m}$  (inset).

239 Long-term single-cell analysis of pancreas-derived organoids reveals cell-to-cell  
240 heterogeneity in cell proliferation

241 Next, we aimed for a deeper quantitative analysis of the dynamic cellular processes in luminal  
242 expansion. The collected high-resolution LSFM images, enabled the semi-automatic  
243 segmentation and quantitative feature extraction over the course of a 6 days acquisition. This  
244 provided robust, time-resolved data on cell nuclei numbers, organoid volume, surface area,  
245 the number of neighbouring cells for each cell as well as the cell density.

246 Using our previously published segmentation pipeline (Hötte et al., 2019; Schmitz et al., 2017),  
247 we processed one time-lapse dataset, which resulted in a total number of 288 segmented time  
248 points. From the segmented data, we chose to analyse three representative organoids. One  
249 small organoid (diameter < 400  $\mu\text{m}$ ), one large organoid (diameter > 400  $\mu\text{m}$ ) and one which  
250 was size-comparable to the large organoid but showed a higher cell number. The three mPOs  
251 expressed Rosa26-nTnG as a nuclei marker (**Figure 3**).

252 We observed that in individual organoids the number of cells increases at different rates even  
253 if they have similar initial cell numbers. We show that an organoid with an initial cell number of  
254 eight increases at a low rate (average: 0.65 cells per hour) and reaches a maximum number  
255 of 107 cells after six days, whereas an organoid starting with nine cells increases at a high rate  
256 (average: 7.41 cells per hour) and ends up with 1077 cells after six days (**Figure 3a, blue and  
257 green frames**). Since the splitting procedure results in different sizes of cell clusters, we also  
258 analysed one organoid that started with 37 cells and reaches a total number of 644 after six  
259 days (average: 4.12 cells per hour) (**Figure 3a, red frames**).

260 To further understand the heterogeneity in proliferation potential and the collective cell  
261 behaviour in general, we also quantified the volume and surface area of the organoid as well  
262 as the neighbourhood relationships of the single cells (**Figure 3b**). We observed that the  
263 organoid with the largest final number of cells did not show the largest volume and surface  
264 area (final cell number: 1077, final volume:  $10 \times 10^7$  voxels, final surface area:  $24 \times 10^3$  pixels,  
265 **Figure 3b, green lines**). In this organoid, the mean number of neighbouring cells was higher  
266 within the proximity cell graph (PCG), meaning that cells are neighbours if they are closer than  
267 a certain distance (distance: 50 pixels, final PCG-value: 35) in comparison to the organoid with  
268 the largest volume and surface area (final PCG-value: 19, final cell number: 644, final volume:  
269  $15 \times 10^7$  voxels, final surface area:  $30 \times 10^3$  pixels, **Figure 3b, red lines**). These findings  
270 correlate with different cell densities, displayed by the number of neighbouring cells within the  
271 Delaunay cell graph (DCG) of 26 and 21 respectively.

272 Interestingly, we observed frequent size oscillations of single organoids within the culture  
273 (**Figure 4c**). Thus, we analysed the size oscillations based on the organoid volume (**Figure 4,  
274 definition “size oscillation” see Box 1**). All three organoids showed frequent size  
275 oscillations. However, over the time course of six days, the small organoid (**Figure 4a, b, blue**

276 **lines**) showed seven oscillations, whereas the two larger organoids showed three (**Figure 4a,**  
 277 **b, red lines**) and two (**Figure 4a, b, green lines**) events, respectively. We did not observe  
 278 any correlation between the size oscillation events and the changes in cell number or number  
 279 and distance of neighbouring cells. Further, we did not observe any size oscillation events in  
 280 the first 80 hours (within the 5% threshold) nor did we observe any synchronised oscillation  
 281 behaviour between the organoids within one culture.

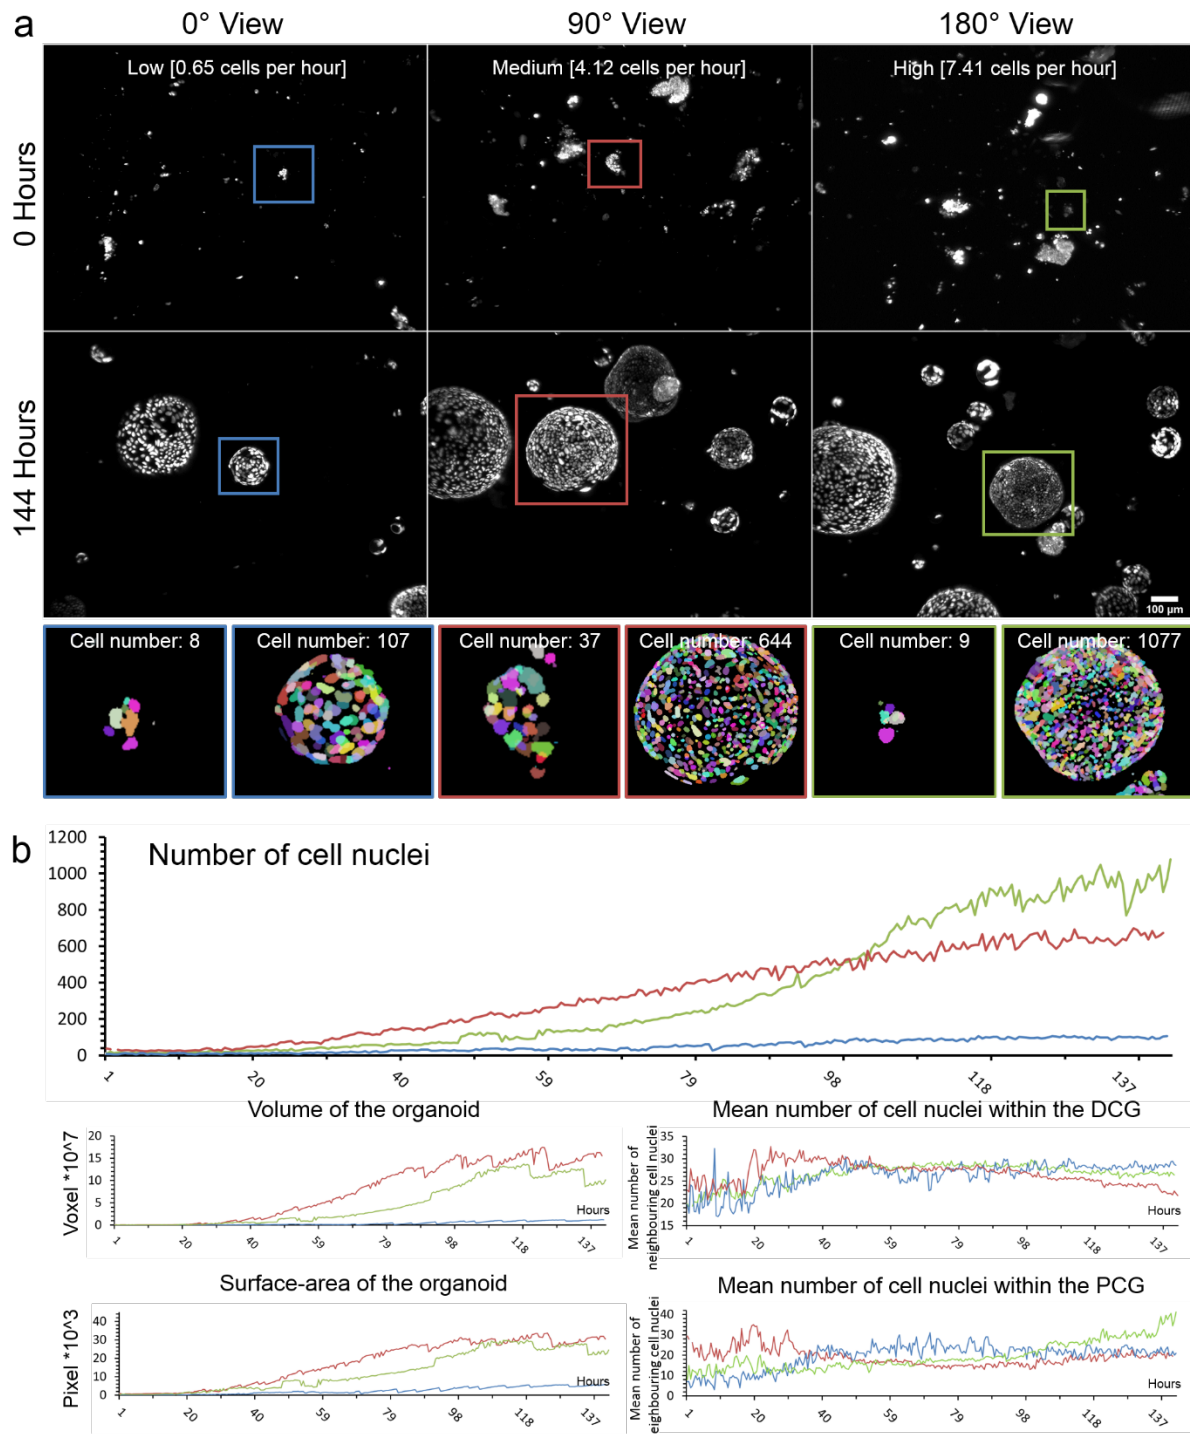

282

283 **Figure 3: Long-term single-cell analysis of mPOs reveals heterogeneity of proliferation**  
 284 **potentials.** mPOs (seeded and maintained in one Z1-FEP-cuvettes) expressed the nuclei  
 285 marker Rosa26-nTnG (grey). Organoids were imaged for six days and analysed with our

286 previously published nuclei segmentation pipeline (Schmitz et al., 2017). (a) Three  
287 representative organoids are shown directly after seeding (0 h, upper row) and after six days  
288 (144 h, lower row). Every row shows one view of the same Z1-FEP-cuvette. Hence, all  
289 displayed organoids were grown simultaneously within one FEP-cuvette. The close-ups  
290 display the segmentation of the organoid at the corresponding time point. Different colours  
291 refer to individual cell nuclei. The coloured frames indicate organoids with different proliferation  
292 rates - green/high, blue/low and red/medium. (b) From top to bottom, corresponding  
293 evaluations of volume, surface area and neighbourhood relationships (DCG: Delaunay cell  
294 graph; PCG: proximity cell graph). Microscope: Zeiss Lightsheet Z.1; objective lenses:  
295 detection: W Plan-Apochromat 20x/1.0, illumination: Zeiss LSM 10x/0.2; laser lines: 561 nm;  
296 filters: laser block filter (LBF) 405/488/561; voxel size: 1.02 x 1.02 x 2.00  $\mu\text{m}^3$ ; recording  
297 interval: 30 min; scale bar: 100  $\mu\text{m}$ .

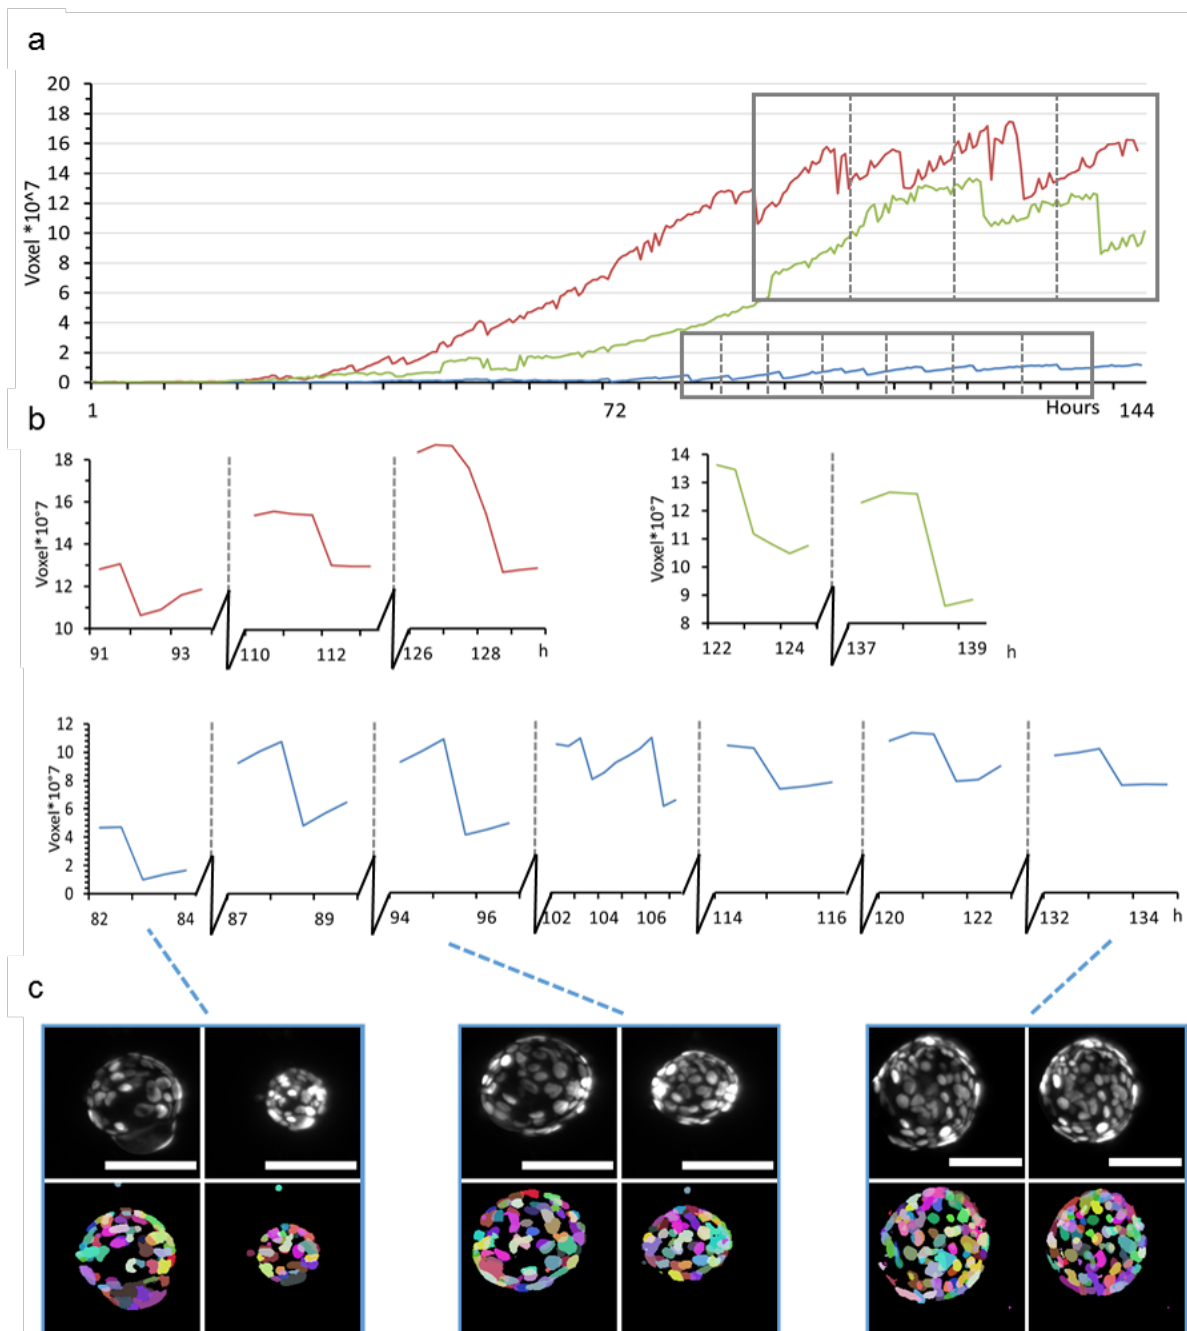

298

299 **Figure 4: Volume analysis of three representative mPOs reveals different oscillation**  
300 **frequencies.** mPOs (seeded and maintained in one Z1-FEP-cuvettes) expressed the nuclei

301 marker Rosa26-nTnG (grey). Organoids were imaged for six days and three representative  
302 organoids were analysed with our previously published nuclei segmentation pipeline (Schmitz  
303 et al., 2017) in regard to size oscillation events. A size oscillation lasts between 30 minutes  
304 and two hours. (a) Volume over time for each organoid approximated from the cell nuclei  
305 segmentation. (b) Detailed analysis of three (red), two (green) and seven (blue) size oscillation  
306 events with more than 5% volume reductions. (c) Typical images of organoid size oscillation.  
307 The upper row shows the nuclei in grey in the raw image, the lower row the segmented cell  
308 nuclei. Each colour illustrates a single cell nucleus. Microscope: Zeiss Lightsheet Z.1; objective  
309 lenses: detection: W Plan-Apochromat 20x/1.0, illumination: Zeiss LSM 10x/0.2; laser lines:  
310 561 nm; filters: laser block filter (LBF) 405/488/561; voxel size: 1.02 x 1.02 x 2.00  $\mu\text{m}^3$ ;  
311 recording interval: 30 min; scale bar: 100  $\mu\text{m}$ .

312

313 [Scaling law derived from simplifying assumptions indicates a dependence of size](#)  
314 [oscillation events on cell division dynamics](#)

315 To solve the mechanical principles underlying size oscillation events, we developed a  
316 mathematical model based on the following assumptions. Since organoids are spherical  
317 single-layer multicellular clusters, they are described by their volume  $V(t)$  and the number of  
318 superficial cells  $N(t)$  at time point  $t$ . We propose a functional relationship for an organoid's  
319 increase in volume  $\dot{V}(t)$ , which is derived from two processes: a) The internal pressure of an  
320 organoid increases with time, due to an influx following the segregation of an osmotic active  
321 substance by the cells. b) Due to mitosis, the cell number  $N(t)$  grows and the surface area  
322  $A(t)$  increases (**Figure 1, Cell division**).

323 We hypothesise that the increase of the cell number  $\dot{N}(t)$  can balance the increase in inner  
324 pressure of an organoid and prevent size oscillation events. In the following we show that this  
325 requires the cell count  $N(t)$  to grow faster than or equal to  $N(t) \sim t^2$ . In return, we expect the  
326 occurrence of size oscillations in the case where the cell number increases slower than  
327  $N(t) \sim t^2$ . Our estimation is based on the following relations and simplifying assumptions:

328

329 i. Organoids form spheres with a volume of

330 
$$V = \frac{1}{6} \pi \cdot d^3$$

331 and a surface area of

332 
$$A = \pi \cdot d^2$$

333

334 The relation between volume and surface area can be written as

335

336 
$$V \sim A^{3/2}$$

337

338 ii. Every cell produces substances, which are secreted into the lumen of the organoid.  
339 We assume that the production rate is constant in time and the same for all cells,  
340 and therefore proportional to the number of superficial cells.

341

$$342 \quad \dot{n}(t) \sim N(t)$$

343

344 iii. We further assume that the relation between secreted substance and osmotic  
345 pressure ( $\Pi$ ) follows the van-'t-Hoff law

346

$$347 \quad \Pi = c \cdot i_{vH} \cdot R \cdot T = \frac{n}{V} \cdot i_{vH} \cdot R \cdot T \sim \frac{n}{V}$$

348

349 iv. Because of cell division, the surface area grows as a function of time,  $A = A(t)$ . We  
350 neglect cell growth and assume that the cell count  $N(t)$  is proportional to the  
351 surface of the organoid,  $A(t)$ .

352

353 v. The total amount of the substance inside the lumen,  $n$ , is the accumulated  
354 substance produced during organoid growth, therefore

355

$$356 \quad n \sim \int A(t)$$

357 This gives us the relation

$$358 \quad \Pi \sim \frac{\int A(t)}{A(t)^{3/2}}$$

359

360 In order to avoid a rupture, the growth of the surface  $A(t)$  has to balance the resulting osmotic  
361 pressure  $\Pi$  arising from constant production of  $n$  by  $A$ . We can compute the functional form of  
362  $A(t)$  which leads to a constant osmotic pressure  $\Pi$ . We require

363

$$364 \quad \frac{\int A(t)}{A(t)^{3/2}} = \text{const.}$$

365

366 This relationship is fulfilled when  $A(t) \sim t^2$ . This scaling law provides the following direct  
367 implications: A constant cell division rate causes the cell count to increase exponentially.  
368 Exponential growth is faster than quadratic, due to the theoretical considerations here we  
369 expect no rupture and subsequent size oscillation events. Some of the organoids, however,  
370 show a quasi-linear increase in cell numbers, which corresponds to a mitosis rate that is

371 decreasing with  $1/t$ . A linear increase is slower than  $t^2$ , hence, in these organoids we expect  
372 rupture and size oscillations.

373 In addition, we point out that the surface to volume ratio of a sphere changes with the radius,  
374 since the volume grows much faster than the surface. Since the osmotically active substance  
375 in the lumen is produced by the surface, this implies that smaller organoids reach a critical  
376 internal pressure earlier than large organoids.

377

378 [Agent-based mathematical model captures the experimental organoid dynamics and](#)  
379 [confirms theoretical considerations](#)

380 In order to confirm our hypotheses we developed a mechanical 3D agent-based model for  
381 organoid size oscillations, based on the experimental data obtained by long-term single cell  
382 analysis of mPOs (**Figure 5a; Supplementary Figure 6**). The model considers intercellular  
383 forces (i.e. repulsion and adhesion), internal pressure of the organoids (due to an osmotic  
384 imbalance), a bending potential of the cells in order to maintain the spherical shape of the  
385 organoid, and cell division. Further, we assume the monolayer of the organoid to break if the  
386 mean distance of neighbours exceeds a certain limit.

387 We hypothesise that the organoids can be represented as elastic spheres with a growing  
388 surface due to cell division (**Figure 5b**). Further, we assume that the cells constantly secrete  
389 a substance into the lumen which leads to osmotic influx. This leads to an increase in the  
390 internal pressure which, however, can be balanced by an increase in volume. Based on these  
391 assumptions, we derived that the organoid can balance the inner pressure when the cell count  
392 increases at least quadratically (**Supplementary theoretical considerations**). Furthermore,  
393 for small organoids the ratio between surface and volume is smaller than for large organoids.  
394 Therefore, small organoids should reach a critical pressure for leakage faster than large  
395 organoids. Thus, we expect the size oscillations to critically depend on a) the cell division  
396 dynamics and b) the organoid size. The latter (b) is confirmed by the data obtained through  
397 bright field analysis (**Figure 6e**).

398 The model is used to support the theoretical considerations and to qualitatively reproduce the  
399 size oscillations of the three analysed mPOs (**Figure 4a-b**). Hereby, the cell division rate is  
400 adjusted to match the experimental data. Simulations of two large organoids do not show a  
401 size oscillation during phases of exponential cell number increase but start to oscillate after  
402 transitioning to a linear growth (**Figure 5c-d, green and red lines**). Simulations with a small  
403 organoid exhibit size oscillation even during the initial exponential growth, which confirms our  
404 hypothesis that small organoids are more prone to rupture and deflation (**Figure 5c-d, blue**  
405 **lines; Figure 6e**).

406



407 Hence, the simulation results show a large qualitative agreement in the size oscillations with  
 408 the experimental data and also coincide with the analytical results.

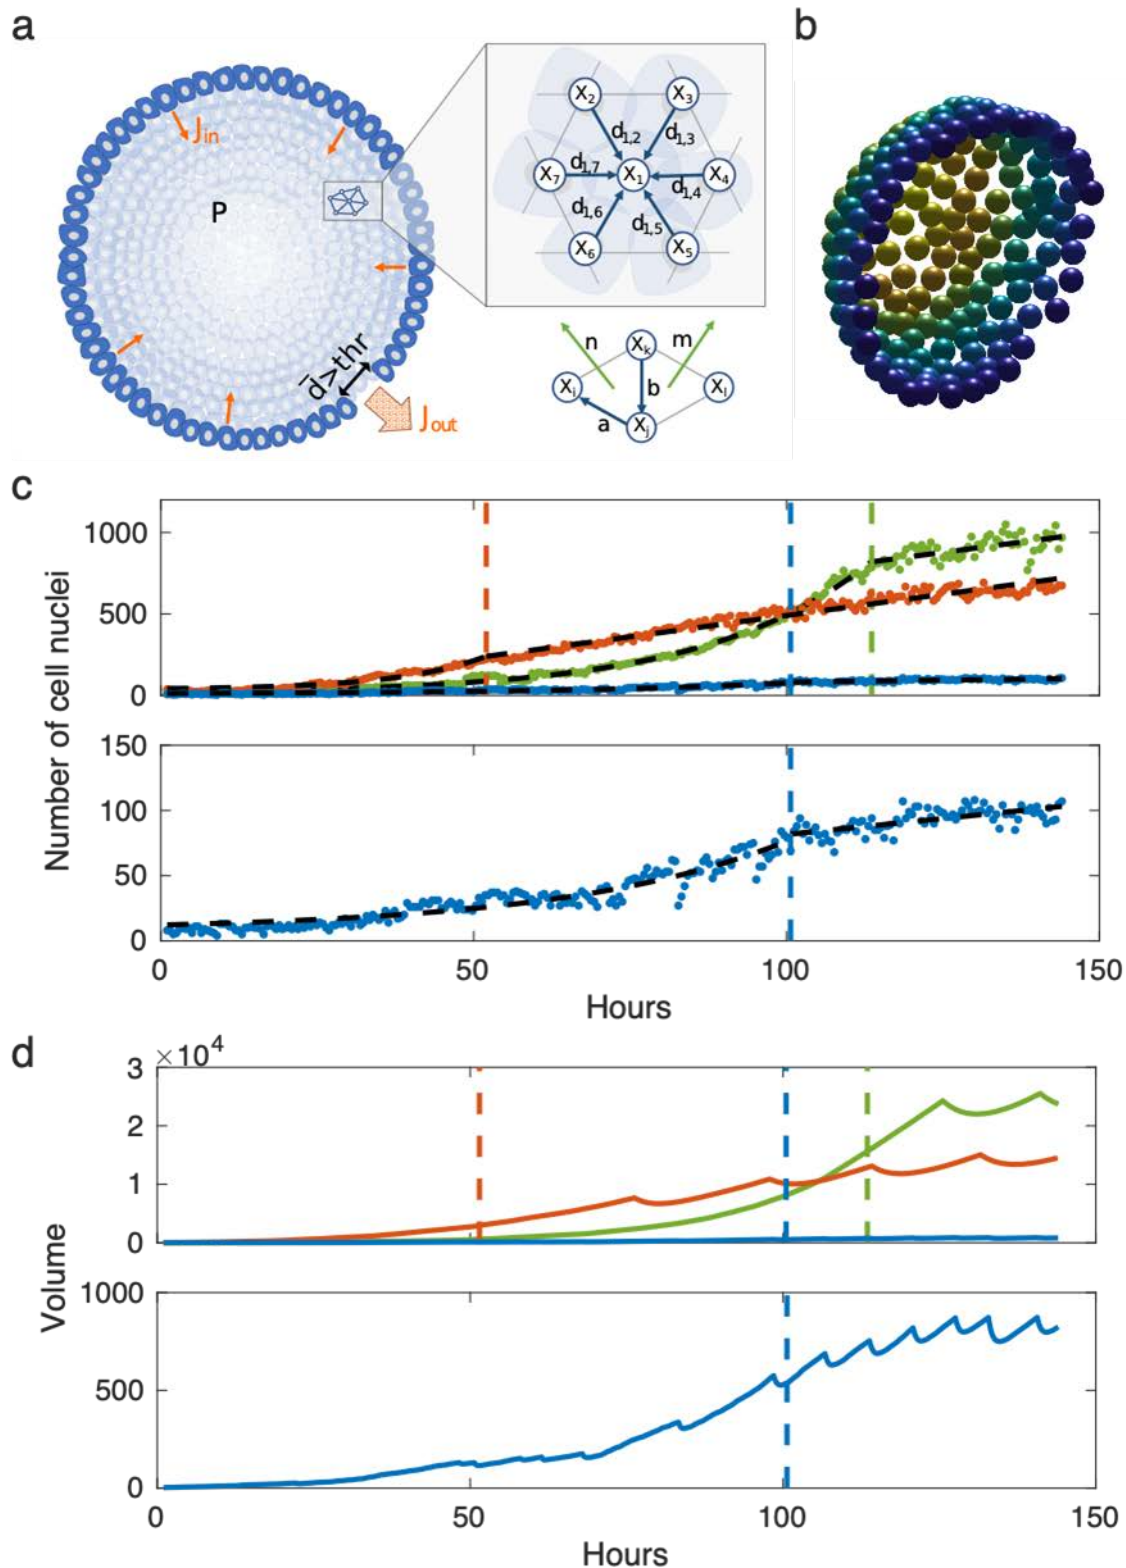

409  
 410 **Figure 5: Computational simulation of a multi-agent object.** (a) Illustration of the general  
 411 model. (b) Snapshot of a simulated sphere cut in half. (c) Piecewise exponential-linear fit (black  
 412 dashed lines) to the growth rates for the long-term single-cell analysis of mPOs. The colours  
 413 resemble organoids shown in **Figure 3**. The dots indicate the cell count of the organoids. The  
 414 coloured dashed lines indicate the transition from exponential to linear growth. (d) Volumes of

415 the simulated organoids. The coloured dashed lines indicate the transition from an exponential  
416 to a linear growth rate. The coloured solid lines show the volumes of the spheres.

417

418 Time-resolved macro- and mesoscale analysis reveals organoid-to-organoid  
419 heterogeneity as well as core regulatory principles.

420 The processes observed using LSFM suggest a vast variety of complex dynamic processes in  
421 organoid cultures. In order to analyse the growth characteristics on a macroscale level and to  
422 confirm the predictions suggested by the computational model, we established a pipeline  
423 based on time-resolved bright field observations. The analysis allows to characterise a  
424 culture's global behaviour. Via semi-automated watershed-based segmentation, the pipeline  
425 allows for quantification of the projected luminal areas [mm<sup>2</sup>] over time of several organoids in  
426 parallel (**Supplementary Figure 1**). Subsequently, from the normalised projected areas, the  
427 relative size increase is evaluated. Further, expansion phases (timing, slope, duration), size  
428 oscillation events (timing, slope, duration) as well as minimum and maximum projected luminal  
429 areas are identified for individual organoids (**Figure 6b**).

430 In **Figure 6c**, the projected areas of 34 pancreas organoids growing within one well are plotted  
431 over 48 hours. The projected areas illustrate the high heterogeneity, with an area distribution  
432 widening over time. After 48 hours of observation, the projected areas have a median of 0.1  
433 mm<sup>2</sup>, while their interquartile range (IQR) ranges from 0.03 to 0.17 mm<sup>2</sup>.

434 Further, we demonstrate that the bright field pipeline provides consistent and robust growth  
435 analysis data in technical replicates (**Box 1**) (three wells, n = 34, 31, 35) (**Figure 6d**). The  
436 median values of the normalised projected areas shows no significant differences between the  
437 technical replicates (Kruskal-Wallis ANOVA).

438 The extracted features can further be used in downstream analyses to categorise organoid  
439 behaviour. We found that the size of an organoid is crucial for the number of oscillation events  
440 it displays. Consistent with the LSFM data and the mathematical model, the bright field analysis  
441 shows that initially smaller organoids (area < 0.01 mm<sup>2</sup>) feature more size oscillation events,  
442 while initially larger organoids display less oscillation events (area > 0.01 mm<sup>2</sup>) (**Figure 6e**).  
443 Besides that, the average expansion factor (a measure for expansion speed consistency) with  
444 a median average value of 0.11 is similar between organoids with various initial areas - 50%  
445 of all values range between 0.09 and 0.14, while only 12% of the evaluated organoids are  
446 outliers with values above 0.22 (**Figure 6f**). Further, the linear correlation between the initial  
447 area and the final area becomes apparent ( $R^2 = 0.7445$ ), which shows that the growth is  
448 independent of the initial area (**Supplementary Figure 7a**). This indicates strong similarities  
449 in expansion speed consistency between individual organoids within one culture despite their  
450 (high) size heterogeneity.

451

452 Besides the already mentioned features, other extracted features facilitate the definition of  
453 quantitative reference parameters of organoid systems. By comparing the final area to the  
454 maximum area, for example, continuous growth of mPOs during the analysed time window is  
455 proven. A comparison of the initial area to the minimum area identifies size oscillation events  
456 or overall descending size progression within organoid cultures. In mPOs, the minimum area  
457 falls only slightly below the initial area, which can be associated with oscillation events  
458 **(Supplementary Figure 7c)**.

459 Besides the average expansion factor, analysis of the maximum expansion factor indicates  
460 expansion speed variations within organoid cultures. As a variable factor, the maximum  
461 expansion can be used to compare different culture conditions **(Supplementary Figure 7b)**.

462 An additional feature, which is likely to change upon differentiation or other perturbations (e.g.  
463 drug treatment), is the organoid circularity. In healthy mPOs, the circularity is 0.9 on average  
464 and the deviation around the average narrows over time **(Supplementary Figure 7e)**. In  
465 addition to the analysis of monocystic epithelial organoids like mPOs, our bright field pipeline  
466 can also be used to analyse deviating organoid morphologies like polycystic hCCOs  
467 **(Supplementary Figure 8a-f)**. Polycystic hCCOs show an average circularity of 0.8 over the  
468 course of 48 hours of observation **(Supplementary Figure 8b)**. Therefore, as a general culture  
469 feature, the circularity can serve as an additional quality control parameter.

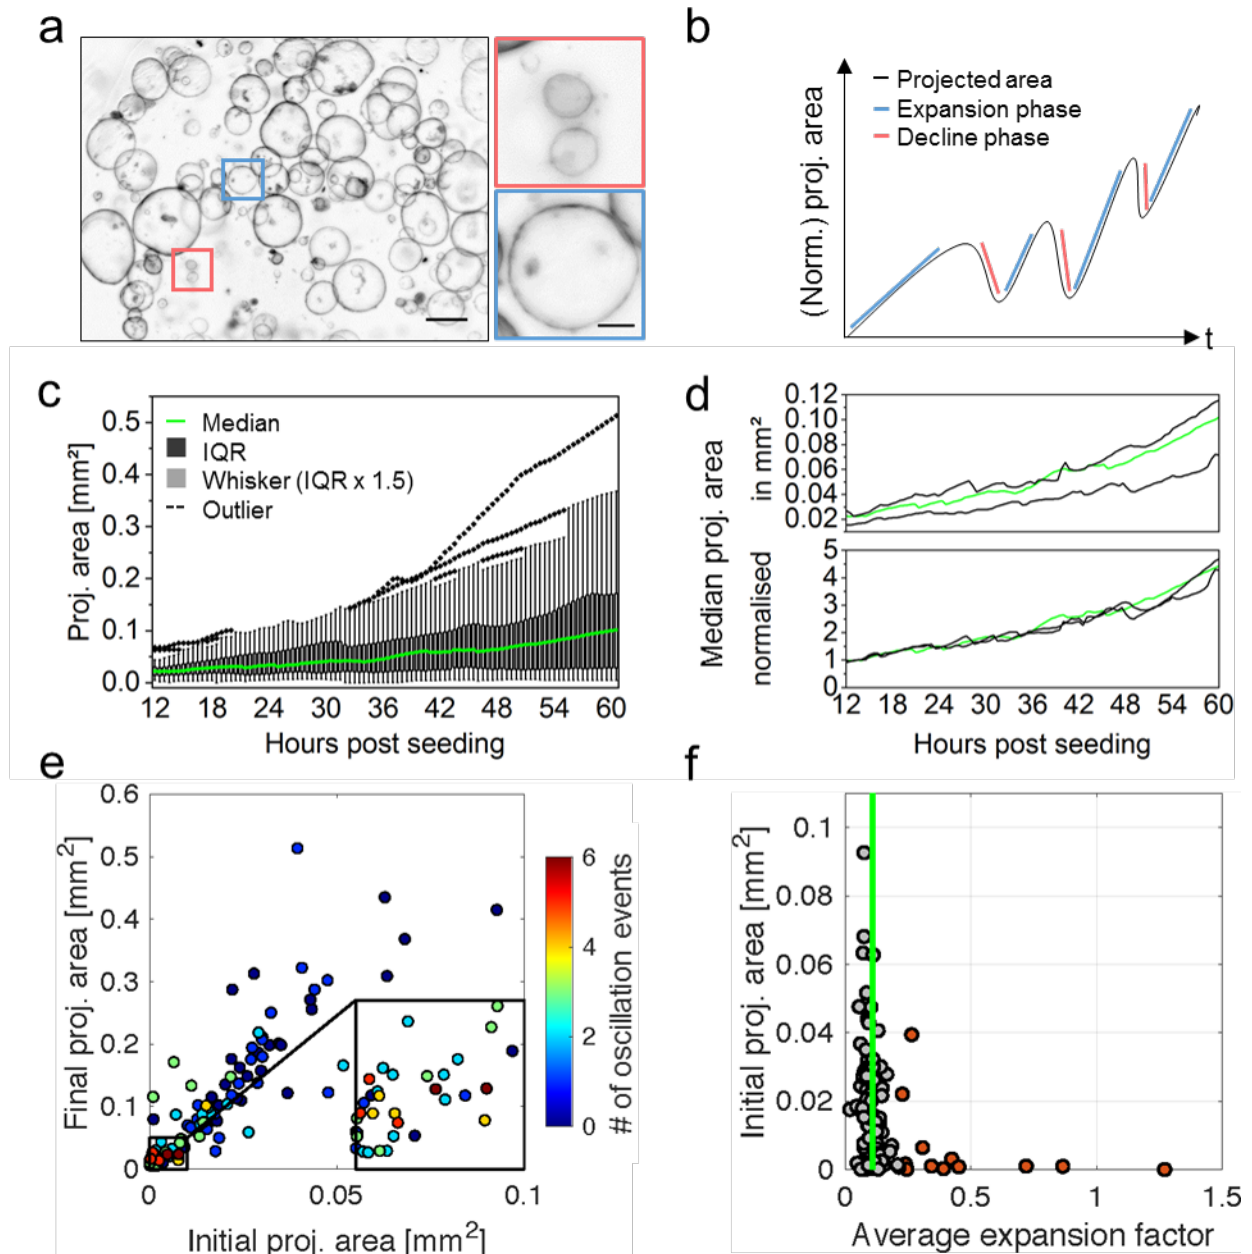

470

471 **Figure 6: Analysis of multiple monocystic mPOs reveals heterogeneity as well as core**  
 472 **regulatory principles.** (a) Overview bright field images of mPOs displaying a monocystic  
 473 phenotype. Microscope: Zeiss Axio Observer Z.1; objective lenses: Plan-Apochromat 5x/0.16,  
 474 avg z-projection, voxel size:  $1.29 \times 1.29 \times 50 \mu\text{m}^3$ , scale bar overview:  $500 \mu\text{m}$ , close-up:  $25$   
 475  $\mu\text{m}$ . (b) Schematic plot of feature extraction based on time-resolved bright field images.  
 476 Multiple features, such as the projected luminal area, expansion phases and size oscillation  
 477 events, were analysed. (c) The projected areas of single organoids growing within one well  
 478 were analysed for 48 hours, starting 12 hours after seeding and revealed high heterogeneity  
 479 in the projected areas. A high inter-cultural heterogeneity is illustrated by a broad inter quartile  
 480 range (black) and outliers (dashed lines) within the box plot ( $n = 34$ ). (d) Medians of projected  
 481 areas of three wells (technical replicates) differ. The medians of the normalised projected areas  
 482 are coherent between individual wells. Median shown in (c) is highlighted in green ( $n = 34, 31,$   
 483  $35$ ). (e) The colour code signals the amount of registered size oscillation events. Smaller  
 484 organoids display an increased number of oscillation events. Close-up reveals location of  
 485 organoids collapsing four to six times ( $n = 100$ ). (f) The median of the average expansion factor  
 486 is 0.11 (green line). Independent of their initial projected area [ $\text{mm}^2$ ], 50% of all organoids

487 display an average expansion factor between 0.09 and 0.14. Here, 12 % of the organoids  
488 feature an average expansion factor above 0.22 and are marked as outliers (red) (n = 100).

## 489 Discussion

490 We describe two complementary light sheet and bright field imaging pipelines for the time-  
491 resolved, multiscale quantitative analysis of single-cell and collective cell behaviours in  
492 organoids. The goal is the characterisation of the heterogeneity of organoid cultures in their  
493 entirety.

494 The light sheet pipeline led to the identification of several dynamic processes typical of  
495 organoid cultures on micro- (single-cell) and mesoscale (individual organoid) levels. The  
496 resolution and contrast of the light sheet images allowed the quantification of these processes  
497 with nuclei segmentation and single-cell tracking. The bright field pipeline allowed quantifying  
498 the dynamics of individual organoids as well as of entire organoid cultures on a macroscale  
499 level. In both pipelines, we choose a time resolution of 30 minutes to capture the growth  
500 behaviour of organoids. We selected this time interval as a technical compromise in the need  
501 for a high temporal resolution to resolve dynamic processes (e.g. budding or cell  
502 rearrangement processes (Serra et al., 2019)), and the need to observe these processes over  
503 long observation periods (e.g. to study cell differentiation (Fatehullah et al., 2016; Lancaster et  
504 al., 2013)).

505 In previous studies, chromosomal segregation errors in organoids were monitored using  
506 confocal or spinning disc microscopy, capturing single organoids in a z-range of 60  $\mu\text{m}$  (3-4  
507 min intervals) (Bolhaqueiro et al., 2019). The observation of single mitotic events with LSFM  
508 over multiple days, from the initial seeding to the plateau-phase of growth, can therefore  
509 increase the throughput and allow the analysis of larger organoids to monitor single cell  
510 behaviour. Serra *et al.* used an inverted LSFM to analyse the development of single organoids  
511 originating from single cells. By parallelisation, they were able to image multiple organoids  
512 (Serra et al., 2019). Our light sheet pipeline combines a parallelised acquisition of more than  
513 100 organoids, within a volume of up to 8  $\text{mm}^3$  given by the Z1-FEP-cuvette, with a high spatial  
514 (1000 z-planes, 2  $\mu\text{m}$  spacing), as well as a high temporal resolution and still allows long-term  
515 observations.

516 Our analysis of mPOs and hCCOs reveals their highly heterogeneous and multi-faceted growth  
517 patterns and common morphological dynamics independent of their carcinogenic or healthy  
518 origin. This matches the observation of intrinsic abilities of single intestinal organoid cells to  
519 form asymmetric structures (Serra et al., 2019), as well as former studies that have not  
520 addressed heterogeneity directly, but already showed variable organoid sizes and irregularly  
521 occurring rupture events (Mahe et al., 2013; Schlaermann et al., 2016; Schwank et al., 2013;  
522 Sebrell et al., 2018).

523 Adult tissue-derived organoids can develop from single cells or cell clusters, although starting  
524 from single cells results in lower organoids formation efficiency, which hampers the systematic  
525 analysis of cellular behaviours (Serra et al., 2019). Starting from cell clusters, the cell survival  
526 and therefore the multiplication-rate of cell material is higher. The production of large amounts  
527 of material for a potential clinical application is therefore ensured (Dossena et al., 2020).  
528 However, starting from clusters, the heterogeneity of the cultures dynamics increases. Since  
529 our pipelines capture both aspects, they support the understanding of clonal formation as well  
530 as the determination of quality control parameters for clinical applications of organoids. We  
531 illustrate at multiple scales that frequent size oscillations in mPOs are common during the  
532 period of growth. It occurs more often in smaller organoids, showing that the initial size of the  
533 cell cluster is a crucial factor. This observation is in contrast to previous findings by Sebrell *et*  
534 *al.* who observed a trend to more size oscillation in large (> 200  $\mu\text{m}$ ) organoids. (Sebrell et al.,  
535 2018). Since they analysed human gastric epithelial organoids, this raises the question of how  
536 organoid systems differ in their behaviour and growth even if they are both of epithelial origin  
537 and grown under similar culture conditions. This further illustrates the need to define core  
538 regulatory principles of organoid systems.

539 Furthermore, we observed and defined the fusion process of organoids. This process has  
540 never been described for organoids in 3D in comparable temporal and spatial resolution before  
541 and shows similarities to several processes in mammalian embryonic development (Kim et al.,  
542 2015) and organ maintenance (Bruens et al., 2017). Kim *et al.* analysed the fusion of the palatal  
543 shelves during craniofacial development and identified three general stages for tissue fusion,  
544 which are comparable to our observed organoid fusions. It is initialised by the convergence of  
545 two epithelial layers, migratory movements towards one epithelial layer and subsequent  
546 rupture of the single cell layer. Dumortier *et al.* showed that the formation of the blastocoel  
547 during mouse pre-implantation is a result of a highly dynamic process of cell-cell ruptures and  
548 fusion events that lead to a final large lumen (Dumortier et al., 2019). They predict that  
549 hydraulic fracturing of cell-cell contacts guides the rupturing process, which is consistent with  
550 our mechanical 3D agent-based model and our data. Observing size oscillation or fusion  
551 events of organoids in high temporal and spatial resolution provides an *ex vivo* model to  
552 understand dynamic processes like tissue fusion or cavity development.

553 The multi-faceted dynamic behaviour of organoids is reflected in their motion. We were able  
554 to show that organoids differ in their overall rotation speed and rotation direction, in their cell  
555 motion depending on their position within the organoid and that not all organoids show  
556 rotational behaviour. In general, rotation in organoids is poorly described directly, however,  
557 dynamic processes are already investigated in other 3D cell culture systems (Ferrari et al.,  
558 2008; Hirata et al., 2018; Marmaras et al., 2010; Tanner et al., 2012). Sebrell *et al.* related the  
559 rotation of gastric epithelial organoids to the passage number and patient/donor history

560 (Sebrell et al., 2018). Wang *et al.* investigated the rotation of 3D human mammary epithelial  
561 acini and identified that cell polarity and microtubules are essential for rotation (Wang et al.,  
562 2013). It remains an exciting question, why not all investigated organoids show rotation.  
563 Computational and mathematical *in silico* models are a valuable tool to understand the  
564 underlying mechanics of 3D cell culture behaviour (Eils et al., 2013). They can be used to  
565 predict organoid behaviour in conditions that are challenging to implement in experiments or  
566 when perturbations of normal conditions occur (Dahl-Jensen et al., 2017; Eils et al., 2013).  
567 However, only relatively few models for organoid systems have been developed (Montes-  
568 Olivas et al., 2019).

569 Here, we implemented a mechanical 3D agent-based model that relies on a limited set of  
570 assumptions (namely intercellular forces, internal pressure of the organoid, bending energy of  
571 the surface and cell division). We showed that the model is a valuable instrument for the  
572 description of spatiotemporal dynamics of organoids. We were able to recreate the qualitative  
573 growth curve of the three segmented organoids and showed that the frequent size oscillation  
574 of organoids is not directly associated with mitosis (for further experimental analysis of the  
575 mechanisms underlying organoid size changes see also Yang *et al.* (Yang et al., 2020).  
576 Instead, the model indicates that the decline process relies on cells losing cell contacts due to  
577 mechanical stress exerted by the internal luminal pressure (Ruiz-Herrero et al., 2017). Further,  
578 the model confirms that the size oscillation dynamics are dependent on the organoid volume-  
579 to-surface ratio and its dynamics with exponential and linear growth phases. The disagreement  
580 between the simulation and data concerning the volume of the medium and large organoid  
581 results from the fact that the cell size differs between the two organoids. The large organoid  
582 exhibits a higher cell density, which implies a smaller cell size compared to the medium size  
583 organoid. Different cell sizes are not considered in the current version of the model but can be  
584 included to reflect these different phenotypes.

585 Our light sheet pipeline shows that the small organoid has a higher size oscillation frequency  
586 (**Box 1**) than the larger organoids. The theoretical considerations and the mathematical model  
587 support this observation: size oscillations are affected by an increased surface-to-volume ratio.  
588 The bright field pipeline further confirm this observation. In summary, the simulation of  
589 epithelial organoid growth predicts organoid behaviour and helps to understand the intrinsic  
590 mechanisms responsible for the organoid phenotype. Further, it is straightforward to generate  
591 a cost- and time-effective tool to predict possible outcomes of external stimuli like drug  
592 treatments for instance (Montes-Olivas et al., 2019).

593 The bright field pipeline enables the quantification of culture dynamics on meso- and  
594 macroscale level, generating robust data on organoid growth behaviour and allowing the  
595 quantification of heterogeneity in whole organoid cultures. The pipeline has been extensively  
596 applied in the LSFM4LIFE ([www.lsfm4life.eu](http://www.lsfm4life.eu)) and the Onconoid Hub projects to measure and

597 optimise the growth of human pancreas-derived organoids in synthetic hydrogels and identify  
598 novel drug candidates for the treatment of intrahepatic cholangiocarcinoma (manuscripts in  
599 preparation). In perspective, the same analysis is suitable to determine parameters of organoid  
600 growth for stem cell therapy (Aberle et al., 2018; Huch et al., 2017; Lancaster et al., 2019;  
601 Nagle et al., 2018) and to characterise patient-specific responses for optimising personalised  
602 drug treatments or assaying the onset of resistance in cancer therapy (Broutier et al., 2017;  
603 Fan et al., 2019; Nagle et al., 2018; Ooft et al., 2019).

604 In conclusion, our multiscale analyses of diverse organoid cultures have a great potential for  
605 further investigations of epithelial organoids and many other complex culture systems.

## 606 [Material and methods](#)

### 607 [Organoid culture](#)

608 hCCOs were initiated from primary liver tumour biopsies of cholangiocarcinoma patients (~0.5  
609 cm<sup>3</sup>) collected during surgery performed at the Erasmus MC – University Medical Center  
610 Rotterdam (NL) and cultured as previously described (Broutier *et al.*, 2017). mPOs were  
611 obtained from Meritxell Huch (Gurdon Institute, Cambridge, UK) and cultured as described  
612 (Huch et al., 2013).

### 613 [Transgenic murine pancreas-derived organoids:](#)

614 The transgenic mPO line was obtained from Meritxell Huch's laboratory at the Wellcome  
615 Trust/CRUK Gurdon Institute, University of Cambridge, UK. The cells were isolated from the  
616 adult pancreas of the Rosa26-nTnG mouse line (*B6;129S6-Gt(ROSA)26Sortm1(CAG-  
617 tdTomato\*,-EGFP\*)Ees/J*, stock no. 023035, The Jackson Laboratory, Bar Harbor, Maine)  
618 according to the isolation protocol (Broutier et al., 2016).

### 619 [Viral transduction of human liver-derived tumour organoids](#)

620 hCCOs were transduced using a third generation lentivector (pLV-Puro-EF1A-  
621 H2B/EGFP:T2A:LifeAct/mCherry, vector ID: IK-VB180119-1097haw, custom-made by and  
622 commercially obtained from AMSBIO, Abingdon, UK) for stable expression of the fluorescent  
623 fusion proteins H2B-eGFP to visualise cell nuclei and LifeAct-mCherry to visualise the F-actin  
624 cytoskeleton. Lentiviral particles were commercially obtained from AMSBIO (Abingdon, UK).  
625 Viral transduction of organoids for stable expression of fluorescent markers in hCCOs was  
626 performed according to a protocol published by Broutier *et al.* (Broutier *et al.*, 2016) with slight  
627 modifications. In brief, organoids were dissociated into small cell clusters by mechanical  
628 fragmentation in pre-warmed (37°C) trypsin and subsequent incubation for 5-10 min. All  
629 centrifugation steps were carried out at room temperature. Positive (transduced) organoids  
630 were selectively picked under semi-sterile conditions instead of being selected by puromycin  
631 administration, and were expanded into positively labelled cultures without sorting.



632 [Ethical approvals](#)

633 The Ethics Approval REC No. 12/EE/0253 from the UK National Research Ethics Service  
634 (NRES) covers the ethical issues involved the generation and culture of the murine pancreas-  
635 derived organoids used in the LSFM4LIFE project and in this work. Medical ethical approval  
636 for the use of patient liver tumour biopsies for research purposes has been granted by the  
637 Medical Ethical Committee (METC) of the Erasmus Medical Center in Rotterdam, The  
638 Netherlands (MEC-2014-060). Patients provided written informed consent and all methods  
639 were performed in accordance with the relevant guidelines and regulations.

640

641 [Light sheet pipeline](#)

642 In order to generate single-cell resolved high-content data of organoid dynamics, the  
643 previously published ultra-thin FEP-foil cuvette (Hötte et al., 2019) was used. To implement it  
644 into the Zeiss Lightsheet Z.1 system (Carl Zeiss AG, Oberkochen, Germany) a new positive  
645 module was produced, and the cuvette was connected with a capillary.

646 [Fabrication of positive moulds for vacuum forming.](#)

647 We designed positive moulds of the cuvettes for the use in the Zeiss Lightsheet Z.1 system by  
648 using the free CAD software “123D Design” (version 2.2.14, Autodesk). We 3D-printed the  
649 positive moulds by using the service of the company Shapeways. Before use, the positive  
650 moulds were inspected by stereomicroscopy and cleaned by immersion in an ultrasonic bath.

651 [Cuvette fabrication with vacuum forming.](#)

652 For a detailed description of the cuvette fabrication with vacuum forming refer to Hötte *et al.*  
653 2019 (Hötte et al., 2019). In brief, a 10 cm x 10 cm squared patch of FEP-foil (50 µm thickness,  
654 batch no. GRN069662, Lohmann Technologies, Milton Keynes, UK) was clamped into the  
655 vacuum-forming machine (JT-18, Jin Tai Machining Company), heated up to 280°C and  
656 pressed onto the square cross-section positive mould described in **Supplementary Figure**  
657 **2d-e**. The positive mould was assembled with a 2 mm x 2 mm 3D-printed square cross-section  
658 rod and a glass capillary (borosilicate glass 3.3, material no. 0500, Hilgenberg GmbH, Malsfeld,  
659 Germany), cut to a length of about 15 mm with a diamond cutter (**Supplementary Figure 2d-**  
660 **e**). After vacuum forming of the FEP foil, the square cross-section rod was carefully removed,  
661 leaving the FEP cuvette supported by the glass capillary, which serves as mechanically stable  
662 connection with the Zeiss Z.1 holder. A shrinking tube (flame retardant polyolefin tube, size 3,  
663 cat. no. E255532, G-APEX, Yuanlin City, Taiwan) was used to close the FEP cuvette and to  
664 connect it to the glass capillary connected with the Zeiss Lightsheet Z.1 xyz stage (Blaubrand  
665 intraMark 200 µl micropipette, cat. no. 708757, BRAND GmbH & Co. KG, Wertheim am Main,  
666 Germany) (**Supplementary Figure 2f**). In order to pipette the samples into the cuvette, the  
667 capillary was removed. Finally, the complete FEP cuvette setup was cleaned with a detergent

668 solution (1% Hellmanex-II in ultrapure water), sterilised in 75% Ethanol for at least two hours  
669 and washed twice with PBS.

#### 670 [Specimen preparation](#)

671 Organoids were cultured as described. During the splitting procedure 20 µl of ECM containing  
672 mPO/hCCO cell clusters were filled into the cuvette. To avoid air bubbles the use of a 20 µl  
673 pipette tip is recommended (TipOne 10/20 µl, STARLAB, Hamburg, Germany). Subsequently,  
674 a glass capillary (Blaubrand intraMark 200 µl micropipette) that has been filled with expansion  
675 medium beforehand was connected. To ensure no leakage, the connections between the  
676 shrinking tube, the FEP cuvette and the glass capillary were wrapped with Parafilm  
677 **(Supplementary Figure 2)**.

678 For imaging, the FEP cuvette attached to the capillary, was inserted in the Zeiss Lightsheet  
679 Z1. The imaging medium in the Zeiss Lightsheet Z1 chamber was DMEM (without phenol red)  
680 dosed with 2% penicillin and streptomycin and HEPES (1:100). During the time of observation,  
681 the medium exchange was conducted under semi-sterile conditions directly at the microscope  
682 with a 10 µl microloader tip (Microloader Tip 0,5-10 µl / 2-20 µl, Eppendorf AG, Hamburg,  
683 Germany) every two days.

#### 684 [Image acquisition and microscopic feature extraction](#)

685 Image stacks of the entire Z1-FEP-cuvette containing the mPOs/hCCOs were acquired with  
686 the Zeiss Lightsheet Z1 microscope. The mPO cells expressed Rosa26-nTnG and were excited  
687 with a 561 nm laser. The hCCO cells expressed H2B-eGFP and LifeAct-mCherry and were  
688 excited with a 488 nm and 561 nm laser. Both cell lines were imaged with a Carl Zeiss W Plan-  
689 Aplanachromat 20x/1.0 UV\_VIS objective and illuminated from two sides with Zeiss LSFM  
690 10x/0.2. During the image acquisition, the chamber was temperature and CO<sub>2</sub> controlled and  
691 constantly filled with pre-warmed DMEM containing 2% penicillin and streptomycin and  
692 HEPES (1:100). mPO image stacks were cropped towards the corresponding organoid (Fiji,  
693 ImageJ) and all single time points of each organoid were segmented and processed separately  
694 by using the previous published multiscale image analysis pipeline (Schmitz et al., 2017) with  
695 the configurations mentioned in **Supplementary Table 1**. For feature extraction and the  
696 surface approximation, the configurations mentioned in **Supplementary Table 1** were used.

#### 697 [Arivis Vision4D](#)

698 3D volume rendering and 3D cell tracking was performed with Arivis Vision4D (Version: 3.1.3,  
699 Arivis AG, Munich, Germany). Prior to segmentation, image stacks were filtered with “Particle  
700 enhancement” (Diameter: 10, Lambda: 1). Single cell nuclei were subsequently segmented  
701 with “Blob Finder” (Segment value: 500 µm, Threshold: 5, Watershed level: 1.303,  
702 NormalizePerFrame: true, SplitSensitivity: 82%) and tracked with “Segment Tracker” (Motion

703 type: Brownian Motion (centroid), Max. distance: 5  $\mu\text{m}$ , Track: Fusion: false – Divisoins: true,  
704 Weighting: Multiple).

705 [Fiji/ImageJ](#)

706 Organoid and nuclei sizes for the visual inspections part of the results were measured manually  
707 on maximum intensity z-projections of the acquired fluorescence image data using  
708 FIJI/ImageJ.

709

710 [Mechanical 3D agent-based model](#)

711 An individual cell-based model was implemented to explain the size oscillations of the  
712 pancreas-derived organoids. The mathematical model was given as a set of stochastic  
713 differential equations that were solved using the Euler-Maruyama method.

714 To describe the pancreas-derived organoid, we assumed it has a roughly spherical shape, with  
715 cells forming a monolayer filled with fluid at a different pressure relative to the environment.

716 The volume of the organoid is affected by two mechanisms: a) the influx of liquid caused by  
717 an osmotic imbalance or active pumping of the cells, and b) cell division. While a) is increasing  
718 the internal pressure, b) leads to a relaxation of the surface.

719 Each cell was described by a small set of features, i.e. a position in 3D space and a cell size  
720 denoted by its radius. Displacement of the cells was described as a response to three forces:  
721 1) external forces exerted by surrounding cells, given as a spring potential, 2) internal pressure  
722 of the organoid pushing the cells outwards, given by the ideal gas law, and 3) a surface bending  
723 energy, keeping the organoid in its spherical shape.

724 Cell division was adjusted to match the experimental data, obtained by long-term single-cell  
725 analysis of pancreas-derived organoids, but can easily be adapted to other growth dynamics.

726 If the average distance of neighbouring cells exceeds a certain limit, we assumed the  
727 mechanical stress to be too high and a leakage in the shell of the organoid emerges. Through  
728 the rupture, the internal liquid is released and the internal pressure decreases. Thus, the  
729 mechanical forces, exerted on the cells might relax and the organoid deflates. When the  
730 average distances between all neighbouring cells falls below a given threshold, the shell closes  
731 and the liquid stops to be released.

732 For a more detailed description of the model, we refer the reader to the supplementary  
733 material.

734

735 [Bright field pipeline](#)

736 [Specimen preparation](#)

737 For the bright field analysis, organoids were seeded in 25  $\mu\text{l}$  ECM (Matrigel, Corning, New  
738 York) droplets in suspension culture plates (48-well, Greiner Bio-One, Kremsmünster, Austria),

739 overlaid with 250  $\mu$ l expansion medium and cultured for 12 h before imaging. They were then  
740 imaged every 30 min in a 3x3 tile imaging (15% overlap) mode using the Zeiss Cell Observer  
741 Z.1, fully equipped with an incubation chamber and motorised stage using a Plan-Apochromat  
742 5x/0.16 objective, with a pixel size of 1.29  $\mu$ m x 1.29  $\mu$ m. In total, ten planes throughout the  
743 droplet were imaged, with a z-distance of 50  $\mu$ m (mPOs) and 65  $\mu$ m (hCCOs), respectively,  
744 capturing a z-range of 450 to 585  $\mu$ m.

#### 745 [Image processing and organoid segmentation](#)

746 Organoid growth rates were determined using a python custom-made pipeline for bright field-  
747 based image segmentation. The whole pipeline was equipped with a general user interface.  
748 The recorded time-lapse image stacks were pre-processed with Fiji (ImageJ version 1.51n,  
749 Java version 1.8.0\_6 (64-bit)) by reducing the dimensionality of the raw data set from 9 (3x3)  
750 tiles with 10 z-planes each to one stitched image with one z-plane per time frame using the  
751 functions Average Intensity ZProjection, Subtract Background (Rolling ball radius: 700 pixels,  
752 Light background, Sliding paraboloid, Disable smoothing) and Grid/Collection stitching  
753 (Preibisch et al., 2009) (Type: Grid: row-by-row, Order: Right & Down). The resulting image  
754 stacks were further subjected to filtering (Median, Radius: 5 pixels), background subtraction  
755 (Rolling ball radius: 500 pixels, Light background, Sliding paraboloid), and the projected  
756 luminal areas of the organoids were using the Fiji plugin Morphological Segmentation  
757 (MorphoLibJ (Legland et al., 2016)  $\rightarrow$  Segmentation  $\rightarrow$  Morphological Segmentation; Border  
758 Image, Tolerance: 10 (mPOs), 12 (hCCOs), Calculate dams: true, Connectivity: 6). Segmented  
759 luminal areas were measured with the Fiji plugin Region Morphometry (MorphoLibJ (Legland  
760 et al., 2016)  $\rightarrow$  Analyze  $\rightarrow$  Region Morphometry).

761 The results were plotted and statistically evaluated (Kruskal-Wallis ANOVA,  $p < 0.05$ ) using  
762 OriginPro 2019 or Excel. For a normalisation, the projected areas were normalised to the  
763 median of the fifth time point.

#### 764 [Mesoscopic feature extraction](#)

765 Quantitative features were extracted using a Python script and were defined as follows: A size  
766 oscillation event consists of a decline phase followed by an expansion phase. The start of a  
767 decline phase was defined as the time point after which the area declines by 5%, and the end  
768 is marked if the area increases again. Expansion phases were defined between the end of a  
769 decline phase and the start of the following decline phase. As additional criterion, the duration  
770 of expansion phases is greater than or equal to five time points, and the correlation coefficient  
771 of the fitted polynomial is above 0.9. The number of decline and expansion phases per  
772 organoid was determined including their duration and slope. Subsequently, maximum and  
773 average expansion slopes were computed. The average expansion factor is specified as the  
774 average slope of all detected expansion phases per organoid. The maximum expansion factor  
775 is specified as the maximum slope of all detected expansion phases per organoid. Outliers in

776 average expansion were defined as smaller than the first quartile minus 1.5 x IQR or above  
777 the third quartile plus 1.5 x IQR. The circularity was monitored continuously and is defined as  
778  $4\pi(\text{area}/\text{perimeter}^2)$ . Its standard deviation is displayed as the average standard deviation in  
779 all analysed wells. Organoids displaying a circularity below 0.6 were considered as deficiently  
780 segmented and were excluded from further analyses. Due to deficient segmentation during  
781 organoid formation the projected area was normalised to the fifth time point of acquisition.

782 **Box 1.**

**Box 1.**

- **Agent-based model:** A computational model, in which cells are represented as autonomous decision-making agents. Agents interact with their environment based on a given ruleset. Agent-based models allow for a high level of physical detail and can reproduce complex behaviour patterns.
- **Biological replicate:** An independently performed experiment with either a new organoid line or a complementary passage of the same organoid line.
- **Core regulatory principles:** Mechanistic understanding of multicellular systems (Sasai *et al.*, 2013).
- **hCCO:** Human cholangiocarcinoma-derived organoids.
- **mPO:** Murine pancreas-derived organoids.
- **Monocystic:** Spherical mono-layered epithelium with a single lumen.
- **Multiscale organoid analysis:** The analysis of an entire organoid culture at the three levels of observation:
  - **Microscale:** Single cell
  - **Mesoscale:** Individual organoid
  - **Macroscale:** Entire organoid culture
- **Non-invasive imaging:** Organoids are imaged without the use of any additional fluorescent dye, any additional substance or any chemical-physical influence besides the medium exchange to ensure optimal growth conditions.
- **Organoid degeneration:** Overall shrinking of the organoid accompanied by nuclear condensation and fading nuclei signals.
- **Organoid luminal dynamics:** Formation, retraction and rupture of duct-like structures within the lumen of an organoid.
- **Organoid size:** The term “size” refers to an organoid’s volume [voxels] based on surface approximations derived from the light sheet image data or to the organoid’s projected luminal area [mm<sup>2</sup>] based on segmented equatorial planes derived from the bright field image data.
- **Polycystic:** An irregularly shaped multi-layered epithelium surrounding multiple lumens.
- **Projected luminal area:** The segmented and measured equatorial plane of an organoid.
- **Size-oscillation event:** Size alteration of an epithelial organoid characterised by the following phases:
  - **Decline phase:** Starts with the time point, upon which the volume/area is 5% smaller than at the previous time point. The decline phase ends when volume/area increases again.
  - **Expansion phase:** Starts with the time point at the end of a decline phase and ends the start of the following decline phase if this phase comprises more than five time points.
- **Size-oscillation frequency:** The rate with which size oscillation events occur.
- **Technical replicate:** One well of organoids that contains several individual organoids of identical origin.
- **Z1-FEP-cuvette:** Custom sample holder for live imaging with the Zeiss Lightsheet Z.1 microscope system based on the previously described ultra-thin FEP-foil cuvette (Hötte *et al.*, 2019).

783

784 **References**

- 785 Aberle, M. R., Burkhart, R. A., Tiriach, H., Olde Damink, S. W. M., Dejong, C. H. C., Tuveson,  
786 D. A., & van Dam, R. M. (2018). Patient-derived organoid models help define personalized  
787 management of gastrointestinal cancer. *British Journal of Surgery*, 105(2), e48–e60. doi:  
788 10.1002/bjs.10726

- 789 Bolhaqueiro, A. C. F., Ponsioen, B., Bakker, B., Klaasen, S. J., Kucukkose, E., van Jaarsveld,  
790 R. H., Vivié, J., Verlaan-Klink, I., Hami, N., Spierings, D. C. J., Sasaki, N., Dutta, D., Boj,  
791 S. F., Vries, R. G. J., Lansdorp, P. M., van de Wetering, M., van Oudenaarden, A.,  
792 Clevers, H., Kranenburg, O., ... Kops, G. J. P. L. (2019). Ongoing chromosomal instability  
793 and karyotype evolution in human colorectal cancer organoids. *Nature Genetics*, *51*(5),  
794 824–834. doi: 10.1038/s41588-019-0399-6
- 795 Broutier, L., Andersson-Rolf, A., Hindley, C. J., Boj, S. F., Clevers, H., Koo, B.-K., & Huch, M.  
796 (2016). Culture and establishment of self-renewing human and mouse adult liver and  
797 pancreas 3D organoids and their genetic manipulation. *Nature Protocols*, *11*(9), 1724–  
798 1743. doi: 10.1038/nprot.2016.097
- 799 Broutier, L., Mastrogiovanni, G., Verstegen, M. M. A., Francies, H. E., Gavarró, L. M.,  
800 Bradshaw, C. R., Allen, G. E., Arnes-Benito, R., Sidorova, O., Gaspersz, M. P.,  
801 Georgakopoulos, N., Koo, B. K., Dietmann, S., Davies, S. E., Praseedom, R. K., Lieshout,  
802 R., IJzermans, J. N. M., Wigmore, S. J., Saeb-Parsy, K., ... Huch, M. (2017). Human  
803 primary liver cancer-derived organoid cultures for disease modeling and drug screening.  
804 *Nature Medicine*, *23*(12), 1424–1435. doi: 10.1038/nm.4438
- 805 Bruens, L., Ellenbroek, S. I. J., van Rheenen, J., & Snippert, H. J. (2017). In Vivo Imaging  
806 Reveals Existence of Crypt Fission and Fusion in Adult Mouse Intestine.  
807 *Gastroenterology*, *153*(3), 674-677.e3. doi: 10.1053/j.gastro.2017.05.019
- 808 Clevers, H. (2016). Modeling Development and Disease with Organoids. In *Cell* (Vol. 165,  
809 Issue 7, pp. 1586–1597). Cell Press. doi: 10.1016/j.cell.2016.05.082
- 810 Dahl-Jensen, S., & Grapin-Botton, A. (2017). The physics of organoids: A biophysical  
811 approach to understanding organogenesis. *Development (Cambridge)*, *144*(6), 946–951.  
812 doi: 10.1242/dev.143693
- 813 de Winter-De Groot, K. M., Janssens, H. M., van Uum, R. T., Dekkers, J. F., Berkers, G., Vonk,  
814 A., Kruisselbrink, E., Oopelaar, H., Vries, R., Clevers, H., Houwen, R. H. J., Escher, J. C.,  
815 Elias, S. G., De Jonge, H. R., de Rijke, Y. B., Tiddens, H. A. W. M., van der Ent, C. K., &  
816 Beekman, J. M. (2018). Stratifying infants with cystic fibrosis for disease severity using  
817 intestinal organoid swelling as a biomarker of CFTR function. *European Respiratory*  
818 *Journal*, *52*(3). doi: 10.1183/13993003.02529-2017
- 819 Dossena, M., Piras, R., Cherubini, A., Barilani, M., Dugnani, E., Salanitro, F., Moreth, T.,  
820 Pampaloni, F., Piemonti, L., & Lazzari, L. (2020). Standardized GMP-compliant scalable  
821 production of human pancreas organoids. *Stem Cell Research and Therapy*, *11*(1), 94.  
822 doi: 10.1186/s13287-020-1585-2
- 823 Dumortier, J. G., Le Verge-Serandour, M., Tortorelli, A. F., Mielke, A., De Plater, L., Turlier, H.,  
824 & Maître, J. L. (2019). Hydraulic fracturing and active coarsening position the lumen of  
825 the mouse blastocyst. *Science*, *365*(6452), 465–468. doi: 10.1126/science.aaw7709

- 826 Eils, R., & Kriete, A. (2013). Introducing Computational Systems Biology. In Computational  
827 Systems Biology: From Molecular Mechanisms to Disease: Second Edition (pp. 1–8).  
828 Elsevier Inc. doi: 10.1016/B978-0-12-405926-9.00001-0
- 829 Fan, H., Demirci, U., & Chen, P. (2019). Emerging organoid models: Leaping forward in cancer  
830 research. In *Journal of Hematology and Oncology* (Vol. 12, Issue 1, p. 142). BioMed  
831 Central Ltd. doi: 10.1186/s13045-019-0832-4
- 832 Fatehullah, A., Tan, S. H., & Barker, N. (2016). Organoids as an in vitro model of human  
833 development and disease. In *Nature Cell Biology* (Vol. 18, Issue 3, pp. 246–254). Nature  
834 Publishing Group. doi: 10.1038/ncb3312
- 835 Ferrari, A., Veligodskiy, A., Berge, U., Lucas, M. S., & Kroschewski, R. (2008). ROCK-  
836 mediated contractility, tight junctions and channels contribute to the conversion of a  
837 preapical patch into apical surface during isochoric lumen initiation. *Journal of Cell*  
838 *Science*, 121(21), 3649–3663. doi: 10.1242/jcs.018648
- 839 Georgakopoulos, N., Prior, N., Angres, B., Mastrogiovanni, G., Cagan, A., Harrison, D.,  
840 Hindley, C. J., Arnes-Benito, R., Liau, S. S., Curd, A., Ivory, N., Simons, B. D.,  
841 Martincorena, I., Wurst, H., Saeb-Parsy, K., & Huch, M. (2020). Long-term expansion,  
842 genomic stability and in vivo safety of adult human pancreas organoids. *BMC*  
843 *Developmental Biology*, 20(1), 4. doi: 10.1186/s12861-020-0209-5
- 844 Greger, K., Swoger, J., & Stelzer, E. H. K. (2007). Basic building units and properties of a  
845 fluorescence single plane illumination microscope. *Review of Scientific Instruments*,  
846 78(2), 023705. doi: 10.1063/1.2428277
- 847 Grün, D., Lyubimova, A., Kester, L., Wiebrands, K., Basak, O., Sasaki, N., Clevers, H., & Van  
848 Oudenaarden, A. (2015). Single-cell messenger RNA sequencing reveals rare intestinal  
849 cell types. *Nature*, 525(7568), 251–255. doi: 10.1038/nature14966
- 850 Harris, T. J. C., & Tepass, U. (2010). Adherens junctions: From molecules to morphogenesis.  
851 In *Nature Reviews Molecular Cell Biology* (Vol. 11, Issue 7, pp. 502–514). Nature  
852 Publishing Group. doi: 10.1038/nrm2927
- 853 Hirata, E., Ichikawa, T., Horike, S. ichi, & Kiyokawa, E. (2018). Active K-RAS induces the  
854 coherent rotation of epithelial cells: A model for collective cell invasion in vitro. *Cancer*  
855 *Science*, 109(12), 4045–4055. doi: 10.1111/cas.13816
- 856 Hötte, K., Koch, M., Hof, L., Tuppi, M., Moreth, T., Verstegen, M. M. A., van der Laan, L. J. W.,  
857 Stelzer, E. H. K., & Pampaloni, F. (2019). Ultra-thin fluorocarbon foils optimise multiscale  
858 imaging of three-dimensional native and optically cleared specimens. *Scientific Reports*,  
859 9(1), 1–13. doi: 10.1038/s41598-019-53380-2
- 860 Huch, M., Bonfanti, P., Boj, S. F., Sato, T., Loomans, C. J. M., Van De Wetering, M., Sojoodi,  
861 M., Li, V. S. W., Schuijers, J., Gračanin, A., Ringnalda, F., Begthel, H., Hamer, K., Mulder,  
862 J., Van Es, J. H., De Koning, E., Vries, R. G. J., Heimberg, H., & Clevers, H. (2013).



- 863 Unlimited in vitro expansion of adult bi-potent pancreas progenitors through the Lgr5/R-  
864 spondin axis. *EMBO Journal*, 32(20), 2708–2721. doi: 10.1038/emboj.2013.204
- 865 Huch, M., Gehart, H., van Boxtel, R., Hamer, K., Blokzijl, F., Verstegen, M. M. A., Ellis, E.,  
866 van Wenum, M., Fuchs, S. A., de Ligt, J., van de Wetering, M., Sasaki, N., Boers, S. J.,  
867 Kemperman, H., de Jonge, J., Ijzermans, J. N. M., Nieuwenhuis, E. E. S., Hoekstra, R.,  
868 Strom, S., ... Clevers, H. (2015). Long-Term Culture of Genome-Stable Bipotent Stem  
869 Cells from Adult Human Liver. *Cell*, 160(1–2), 299–312. doi:  
870 10.1016/J.CELL.2014.11.050
- 871 Huch, M., Knoblich, J. A., Lutolf, M. P., & Martinez-Arias, A. (2017). The hope and the hype of  
872 organoid research. *Development (Cambridge)*, 144(6), 938–941. doi:  
873 10.1242/dev.150201
- 874 Ishiguro, H., Yamamoto, A., Nakakuki, M., Yi, L., Ishiguro, M., Yamaguchi, M., Kondo, S., &  
875 Mochimaru, Y. (2012). Physiology and pathophysiology of bicarbonate secretion by  
876 pancreatic duct epithelium. In Nagoya J. Med. Sci (Vol. 74, Issue 1).
- 877 Karolak, A., Markov, D. A., McCawley, L. J., & Rejniak, K. A. (2018). Towards personalized  
878 computational oncology: From spatial models of tumour spheroids, to organoids, to  
879 tissues. In Journal of the Royal Society Interface (Vol. 15, Issue 138). Royal Society  
880 Publishing. doi: 10.1098/rsif.2017.0703
- 881 Keller, P. J., Schmidt, A. D., Wittbrodt, J., & Stelzer, E. H. K. (2008). Reconstruction of  
882 zebrafish early embryonic development by scanned light sheet microscopy. *Science*,  
883 322(5904), 1065–1069. doi: 10.1126/science.1162493
- 884 Kim, S., Lewis, A. E., Singh, V., Ma, X., Adelstein, R., & Bush, J. O. (2015). Convergence and  
885 Extrusion Are Required for Normal Fusion of the Mammalian Secondary Palate. *PLoS*  
886 *Biology*, 13(4), 1–25. doi: 10.1371/journal.pbio.1002122
- 887 Kretzschmar, K., & Clevers, H. (2016). Organoids: Modeling Development and the Stem Cell  
888 Niche in a Dish. In Developmental Cell (Vol. 38, Issue 6, pp. 590–600). Cell Press. doi:  
889 10.1016/j.devcel.2016.08.014
- 890 Lancaster, M. A., & Huch, M. (2019). Disease modelling in human organoids. *DMM Disease*  
891 *Models and Mechanisms*, 12(7), dmm039347. doi: 10.1242/dmm.039347
- 892 Lancaster, M. A., Renner, M., Martin, C. A., Wenzel, D., Bicknell, L. S., Hurles, M. E., Homfray,  
893 T., Penninger, J. M., Jackson, A. P., & Knoblich, J. A. (2013). Cerebral organoids model  
894 human brain development and microcephaly. *Nature*, 501(7467), 373–379. doi:  
895 10.1038/nature12517
- 896 Legland, D., Arganda-Carreras, I., & Andrey, P. (2016). MorphoLibJ: Integrated library and  
897 plugins for mathematical morphology with ImageJ. *Bioinformatics*, 32(22), 3532–3534.  
898 doi: 10.1093/bioinformatics/btw413
- 899 Loomans, C. J. M., Williams Giuliani, N., Balak, J., Ringnalda, F., van Gorp, L., Huch, M., Boj,

- 900 S. F., Sato, T., Kester, L., de Sousa Lopes, S. M. C., Roost, M. S., Bonner-Weir, S.,  
901 Engelse, M. A., Rabelink, T. J., Heimberg, H., Vries, R. G. J., van Oudenaarden, A.,  
902 Carlotti, F., Clevers, H., & de Koning, E. J. P. (2018). Expansion of Adult Human  
903 Pancreatic Tissue Yields Organoids Harboring Progenitor Cells with Endocrine  
904 Differentiation Potential. *Stem Cell Reports*, *10*(3), 712–724. doi:  
905 10.1016/j.stemcr.2018.02.005
- 906 Mahe, M. M., Aihara, E., Schumacher, M. A., Zavros, Y., Montrose, M. H., Helmrath, M. A.,  
907 Sato, T., & Shroyer, N. F. (2013). Establishment of Gastrointestinal Epithelial Organoids.  
908 *Current Protocols in Mouse Biology*, *3*(4), 217–240. doi:  
909 10.1002/9780470942390.mo130179
- 910 Mandelkow, R., GüMBEL, D., Ahrend, H., Kaul, A., Zimmermann, U., Burchardt, M., & Stope,  
911 M. B. (2017). Detection and quantification of nuclear morphology changes in apoptotic  
912 cells by fluorescence microscopy and subsequent analysis of visualized fluorescent  
913 signals. *Anticancer Research*, *37*(5), 2239–2244. doi: 10.21873/anticancer.11560
- 914 Marmaras, A., Berge, U., Ferrari, A., Kurtcuoglu, V., Poulidakos, D., & Kroschewski, R. (2010).  
915 A mathematical method for the 3D analysis of rotating deformable systems applied on  
916 lumen-forming MDCK cell aggregates. *Cytoskeleton*, *67*(4), 224–240. doi:  
917 10.1002/cm.20438
- 918 Montes-Olivas, S., Marucci, L., & Homer, M. (2019). Mathematical Models of Organoid  
919 Cultures. *Frontiers in Genetics*, *10*, 873. doi: 10.3389/fgene.2019.00873
- 920 Nagle, P. W., Plukker, J. T. M., Muijs, C. T., van Luijk, P., & Coppes, R. P. (2018). Patient-  
921 derived tumor organoids for prediction of cancer treatment response. In *Seminars in*  
922 *Cancer Biology* (Vol. 53, pp. 258–264). Academic Press. doi:  
923 10.1016/j.semcancer.2018.06.005
- 924 Odenwald, M. A., Choi, W., Buckley, A., Shashikanth, N., Joseph, N. E., Wang, Y., Warren, M.  
925 H., Buschmann, M. M., Pavlyuk, R., Hildebrand, J., Margolis, B., Fanning, A. S., & Turner,  
926 J. R. (2017). ZO-1 interactions with F-actin and occludin direct epithelial polarization and  
927 single lumen specification in 3D culture. *Journal of Cell Science*, *130*(1), 243–259. doi:  
928 10.1242/jcs.188185
- 929 Ooft, S. N., Weeber, F., Dijkstra, K. K., McLean, C. M., Kaing, S., van Werkhoven, E., Schipper,  
930 L., Hoes, L., Vis, D. J., van de Haar, J., Prevoo, W., Snaebjornsson, P., van der Velden,  
931 D., Klein, M., Chalabi, M., Boot, H., van Leerdam, M., Bloemendal, H. J., Beerepoot, L.  
932 V., ... Voest, E. E. (2019). Patient-derived organoids can predict response to  
933 chemotherapy in metastatic colorectal cancer patients. *Science Translational Medicine*,  
934 *11*(513). doi: 10.1126/scitranslmed.aay2574
- 935 Preibisch, S., Saalfeld, S., & Tomancak, P. (2009). Globally optimal stitching of tiled 3D  
936 microscopic image acquisitions. *Bioinformatics*, *25*(11), 1463–1465. doi:

- 937 10.1093/bioinformatics/btp184
- 938 Ruiz-Herrero, T., Alessandri, K., Gurchenkov, B. V., Nassoy, P., & Mahadevan, L. (2017).  
939 Organ size control via hydraulically gated oscillations. *Development*, 144(23), 4422–  
940 4427. doi: 10.1242/dev.153056
- 941 Sasai, Y. (2013). Cytosystems dynamics in self-organization of tissue architecture. *Nature*,  
942 493(7432), 318–326. doi: 10.1038/nature11859
- 943 Schlaermann, P., Toelle, B., Berger, H., Schmidt, S. C., Glanemann, M., Ordemann, J.,  
944 Bartfeld, S., Mollenkopf, H. J., & Meyer, T. F. (2016). A novel human gastric primary cell  
945 culture system for modelling *Helicobacter pylori* infection in vitro. *Gut*, 65(2), 202–213.  
946 doi: 10.1136/gutjnl-2014-307949
- 947 Schmitz, A., Fischer, S. C., Mattheyer, C., Pampaloni, F., & Stelzer, E. H. K. (2017). Multiscale  
948 image analysis reveals structural heterogeneity of the cell microenvironment in homotypic  
949 spheroids. *Scientific Reports*, 7(January), 43693 (1-13). doi: 10.1038/srep43693
- 950 Schwank, G., Andersson-Rolf, A., Koo, B. K., Sasaki, N., & Clevers, H. (2013). Generation of  
951 BAC Transgenic Epithelial Organoids. *PLoS ONE*, 8(10), 6–11. doi:  
952 10.1371/journal.pone.0076871
- 953 Sebrell, T. A., Sidar, B., Bruns, R., Wilkinson, R. A., Wiedenheft, B., Taylor, P. J., Perrino, B.  
954 A., Samuelson, L. C., Wilking, J. N., & Bimczok, D. (2018). Live imaging analysis of human  
955 gastric epithelial spheroids reveals spontaneous rupture, rotation and fusion events. *Cell  
956 and Tissue Research*, 371(2), 293–307. doi: 10.1007/s00441-017-2726-5
- 957 Serra, D., Mayr, U., Boni, A., Lukonin, I., Rempfler, M., Challet Meylan, L., Stadler, M. B.,  
958 Strnad, P., Papasaikas, P., Vischi, D., Waldt, A., Roma, G., & Liberali, P. (2019). Self-  
959 organization and symmetry breaking in intestinal organoid development. *Nature*, 569, 66–  
960 72. doi: 10.1038/s41586-019-1146-y
- 961 Stelzer, E. H. K. (2015). Light-sheet fluorescence microscopy for quantitative biology. *Nature  
962 Methods*, 12(1), 23–26. doi: 10.1038/nmeth.3219
- 963 Stichel, D., Middleton, A. M., Müller, B. F., Depner, S., Klingmüller, U., Breuhahn, K., &  
964 Matthäus, F. (2017). An individual-based model for collective cancer cell migration  
965 explains speed dynamics and phenotype variability in response to growth factors. *Npj  
966 Systems Biology and Applications*, 3(1), 1–10. doi: 10.1038/s41540-017-0006-3
- 967 Takeda, N., Jain, R., Li, D., Li, L., Lu, M. M., & Epstein, J. A. (2013). Lgr5 Identifies Progenitor  
968 Cells Capable of Taste Bud Regeneration after Injury. *PLoS ONE*, 8(6), e66314. doi:  
969 10.1371/journal.pone.0066314
- 970 Tanner, K., Mori, H., Mroue, R., Bruni-Cardoso, A., & Bissell, M. J. (2012). Coherent angular  
971 motion in the establishment of multicellular architecture of glandular tissues. *Proceedings  
972 of the National Academy of Sciences of the United States of America*, 109(6), 1973–1978.  
973 doi: 10.1073/pnas.1119578109

- 974 Trepat, X., & Sahai, E. (2018). Mesoscale physical principles of collective cell organization. In  
975 Nature Physics (Vol. 14, Issue 7, pp. 671–682). Nature Publishing Group. doi:  
976 10.1038/s41567-018-0194-9
- 977 Verveer, P. J., Swoger, J., Pampaloni, F., Greger, K., Marcello, M., & Stelzer, E. H. K. (2007).  
978 High-resolution three-dimensional imaging of large specimens with light sheet–based  
979 microscopy. *Nature Methods*, 4(4), 311–313. doi: 10.1038/nmeth1017
- 980 Wang, H., Lacoche, S., Huang, L., Xue, B., & Muthuswamy, S. K. (2013). Rotational motion  
981 during three-dimensional morphogenesis of mammary epithelial acini relates to laminin  
982 matrix assembly. *Proceedings of the National Academy of Sciences of the United States*  
983 *of America*, 110(1), 163–168. doi: 10.1073/pnas.1201141110
- 984 Xavier da Silveira dos Santos, A., & Liberali, P. (2019). From single cells to tissue self-  
985 organization. *The FEBS Journal*, 286(8), 1495–1513. doi: 10.1111/febs.14694
- 986 Yang, Q., Xue, S.-L., Chan, C. J., Rempfler, M., Vischi, D., Gutierrez, F. M., Hiragi, T.,  
987 Hannezo, E., & Liberali, P. (2020). Cell fate coordinates mechano-osmotic forces in  
988 intestinal crypt morphogenesis. *BioRxiv*, 2020.05.13.094359. doi:  
989 10.1101/2020.05.13.094359

990

## 991 Acknowledgements

992 FP, EHKS, LH, TM, MKoch thank the EU Horizon2020 project LSF4LIFE (grant no. 668350-  
993 2), the ZonMw-BMBF joint sponsored project Onconoid Hub (grant no. 114027003), and the  
994 DFG Cluster of Excellence Frankfurt “Macromolecular Complexes” (CEF-MCII) for funding.  
995 FM is generously supported by the Giersch foundation. TL, FM are supported by funding from  
996 the Hessen State Ministry for Higher Education, Research and the Arts in the framework of the  
997 Loewe Program (DynaMem, CMMS).

998

## 999 Authors' contribution

1000 LH and TM cultured the murine pancreas-derived organoids. LH imaged, analysed and  
1001 evaluated the data acquired with the bright field pipeline. TM imaged, analysed, 3D rendered  
1002 and evaluated the data acquired with the light sheet pipeline. TM evaluated the pH and  
1003 temperature properties of the Zeiss Lightsheet Z.1 microscope system. MKoch designed the  
1004 viral transduction vector and cultured the human liver-derived tumour organoids. TL, MKurtz  
1005 and FM developed the 3D agent-based mathematical model. TL analysed and visualised the  
1006 data from the experiments and simulations. MKurtz and FM derived the mathematical relations  
1007 on the dependence between pressure and cell division dynamics. JT developed the bright field  
1008 pipeline and generated a general user interface. TL commented and improved the bright field

1009 analysis pipeline. SML transduced the human liver-derived tumour organoids. MMAV and  
 1010 LJWvdL provided the human liver-derived tumour organoid cultures. MH provided the murine  
 1011 pancreas-derived organoid cultures. FP invented the ultra-thin FEP-foil cuvettes, designed and  
 1012 improved their fabrication process. FP and TM adapted the ultra-thin FEP-foil cuvettes for the  
 1013 application to the Zeiss Lightsheet Z.1 microscope. FM, FP and EHKS supervised the work.  
 1014 LH, TM, MKoch, TL, MKurtz, FM and FP wrote the manuscript. All authors contributed to the  
 1015 writing process, and revised and approved the manuscript.

1016 [Conflict of interest](#)

1017 FP and EHKS have issued a patent on the ultra-thin FEP-foil cuvettes (US9816916B2).

1018 [Supplementary Information](#)

1019 [Supplementary Figures](#)

1020

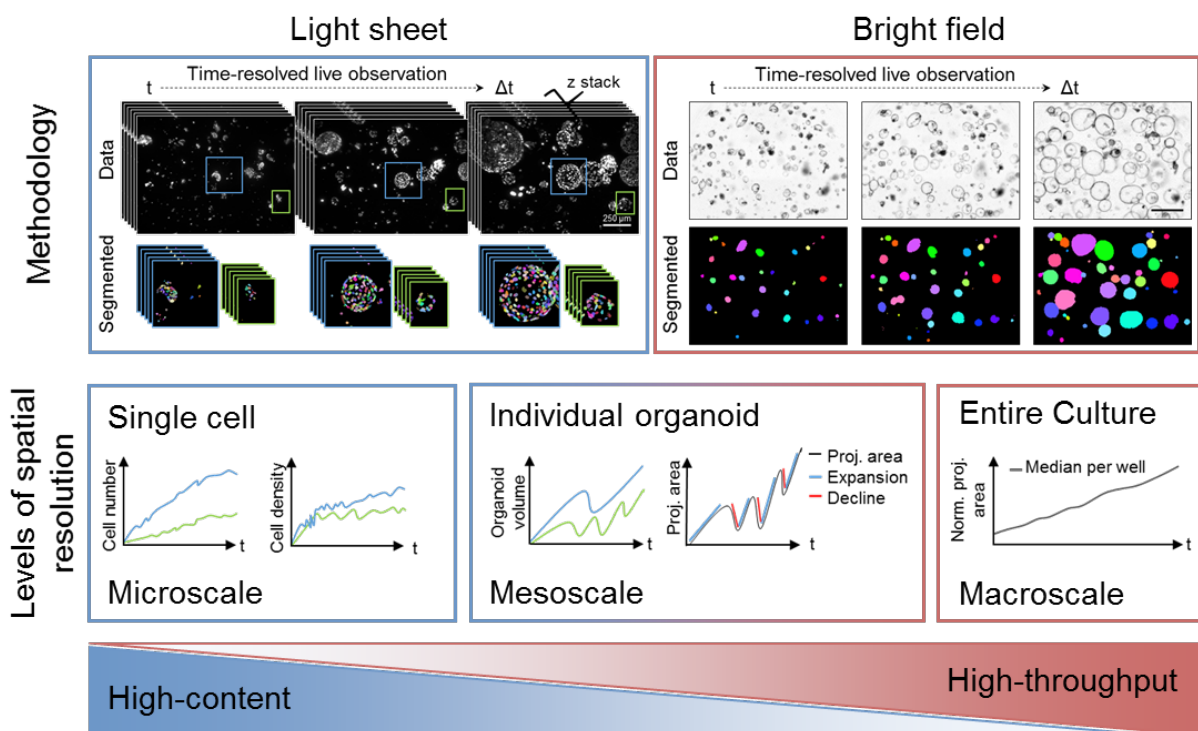

1021  
 1022 **Supplementary Figure 1: Light sheet and bright field time-resolved observation allow**  
 1023 **quantitative analyses of micro-, meso- and macroscale dynamics in organoid cultures.**

1024 Using a light sheet-based fluorescent microscope time-resolved image stack of organoids are  
 1025 recorded. The high-resolution images are subjected to nuclei segmentation (Schmitz et al.,  
 1026 2017) for the quantification of dynamics on single cell level (microscale). Besides that,  
 1027 dynamics, such as size oscillation events, of individual organoids (mesoscale) can be  
 1028 analysed. The restricted throughput of this pipeline is matched with the analyses based on  
 1029 time-resolved bright field images. Here, the dynamics of high numbers of organoids are  
 1030 quantified based on the normalised (norm.) projected (proj.) luminal areas. The pipeline also  
 1031 enables the observation of entire organoid cultures (macroscale) within individual wells.

1032

1033  
1034  
1035

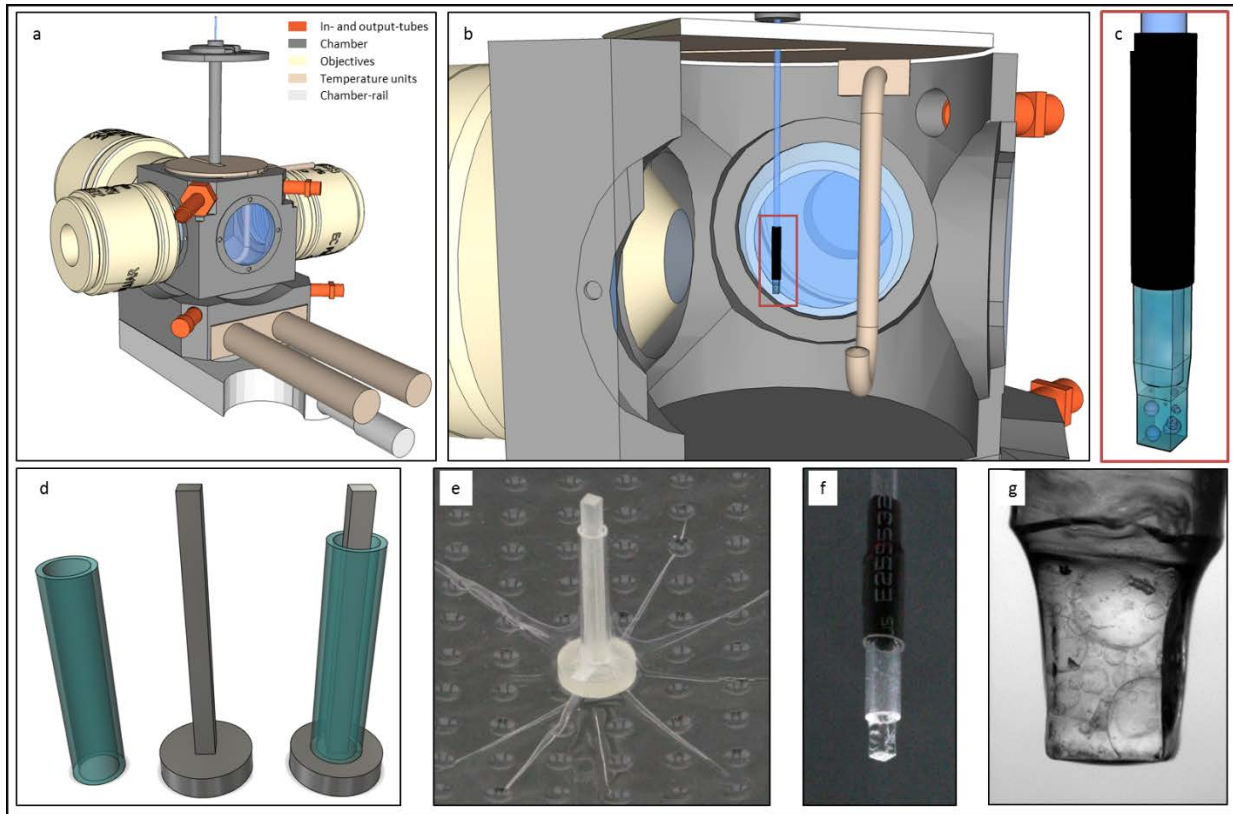

1036  
1037  
1038  
1039  
1040  
1041  
1042  
1043  
1044  
1045  
1046

**Supplementary Figure 2: Ultra-thin FEP-foil cuvette holders for live recordings with the Zeiss Lightsheet Z.1 microscope system - Z1-FEP-cuvettes.** (a) Illustration of the general setup of the Zeiss Lightsheet Z.1 microscope. (b) Close-up of the microscope chamber with the downwards directed Z1-FEP-cuvette enclosing the sample. (c) Close-up of the sample holder. The shrinking tube that seals the FEP cuvette and connects it with the glass capillary is depicted in black. (d) CAD-derived drawings of positive moulds of the FEP cuvette and the glass capillary needed to produce the Z1-FEP-cuvette. (e) Printed mould with a glass capillary used to form the Z1-FEP-cuvette in the vacuum forming process. (f) Ready-to-use Z1-FEP-cuvette. (g) mPOs grown for 7 days in the Z1-FEP-cuvette.

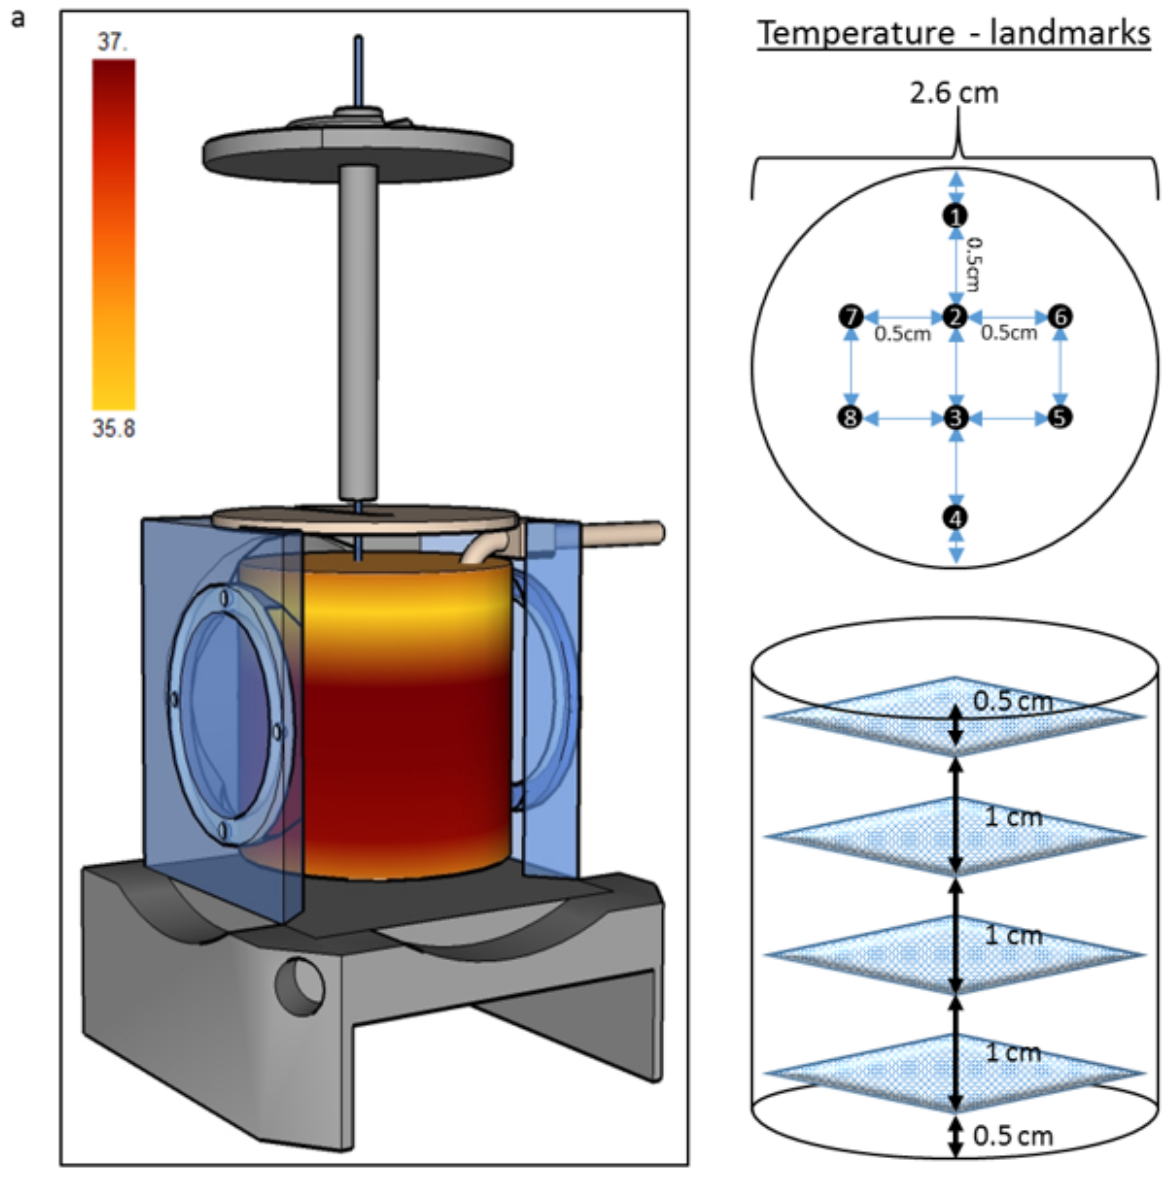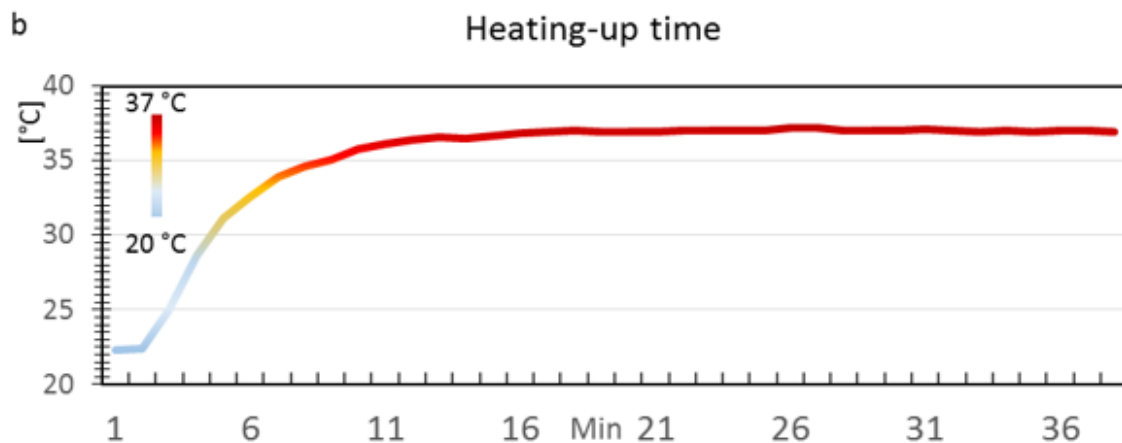

1047

1048

1049

1050

1051

1052

**Supplementary Figure 3: Validation of the temperature properties of the Zeiss Lightsheet Z.1 microscope.** (a) Illustration of the temperature distribution inside of the Zeiss Lightsheet Z.1 microscope chamber and the corresponding measurement landmarks. Beside the open, upper part with a slightly lower value, the temperature is equally distributed throughout the chamber. (b) Results of the measurement of the heating-up time. The included

1053 heating unit of the microscope needs to heat up the medium starting from room temperature  
1054 (21°C). After 12 minutes the medium reaches the physiological temperature of 37°C..



1055

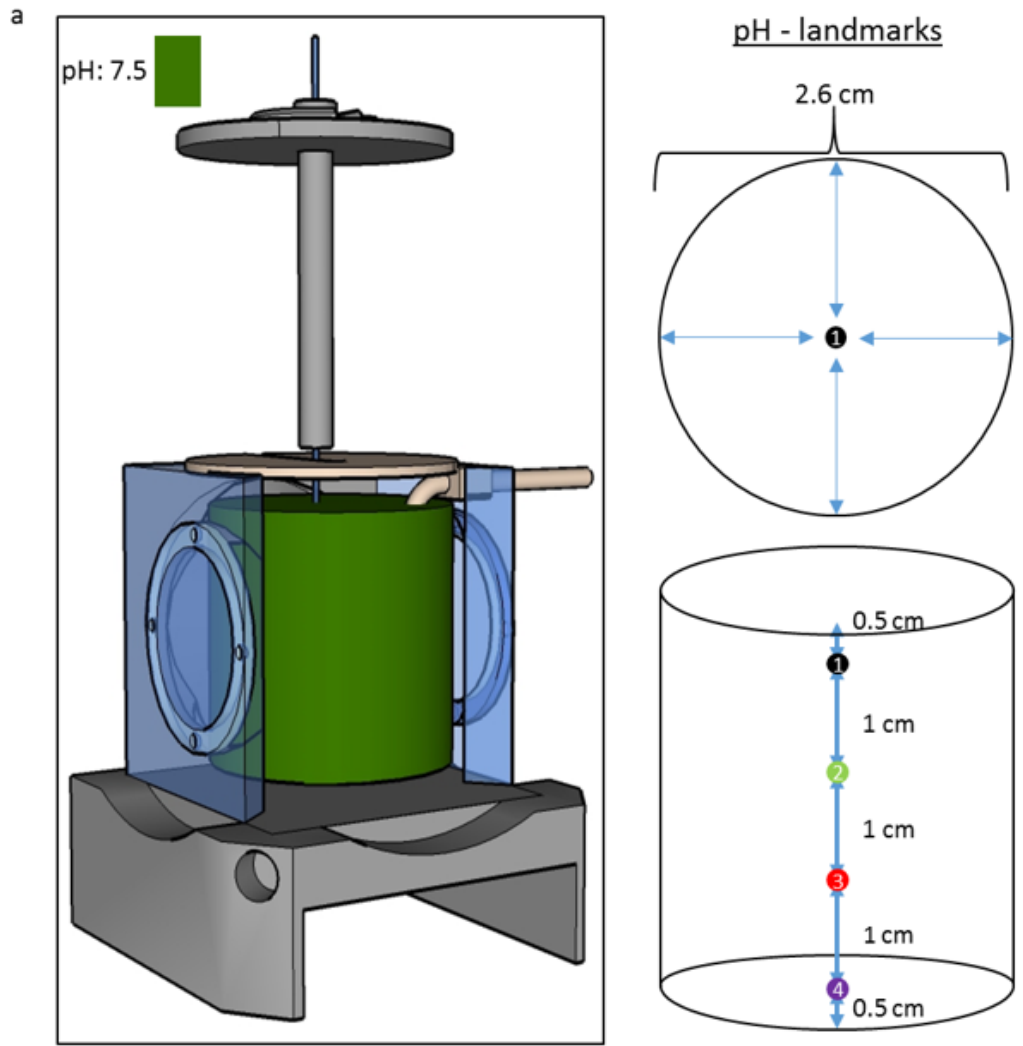

b pH-value recovery potential over time

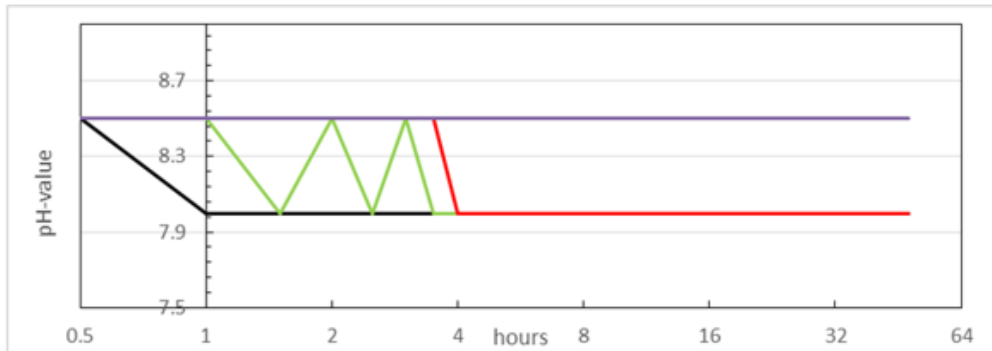

c Average pH-value over time

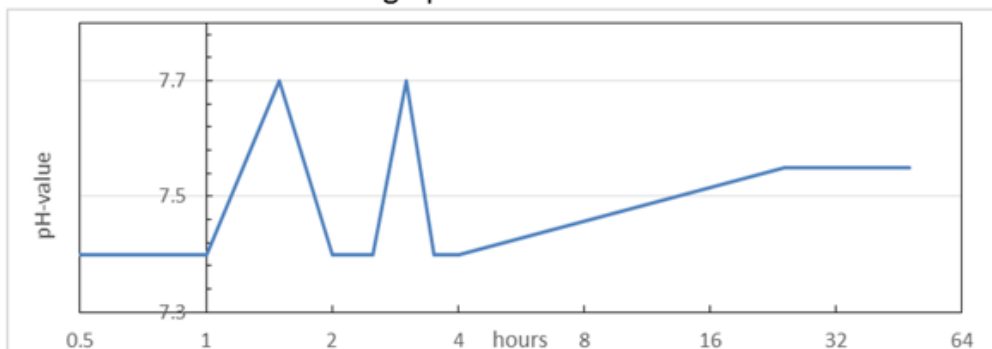

1056 **Supplementary Figure 4: Validation of the pH properties of the Zeiss Lightsheet Z.1**  
1057 **microscope.** (a) Illustration of the pH-value distribution inside the chamber of the Zeiss  
1058 Lightsheet Z.1 microscope and the corresponding measurement landmarks. After filling the  
1059 chamber with buffered media the pH-value is evenly distributed at 7.5 throughout the chamber.  
1060 (b) The constant CO<sub>2</sub> fumigation that is directed over the liquid column is not able to recover  
1061 a lower pH-value over time. The pH-value of the medium changes from 8.5 to 8 but it never  
1062 reaches the physiologically necessary 7.5 (liquid depth: 3 cm). The same is observed at 1 cm  
1063 and 2 cm liquid depth. At the bottom of the chamber, the pH-value does not change within 48  
1064 hours. (c) Once the inserted medium has the right pH-value, the incubation system is able to  
1065 keep it on the same level for more than 2 days.

1066

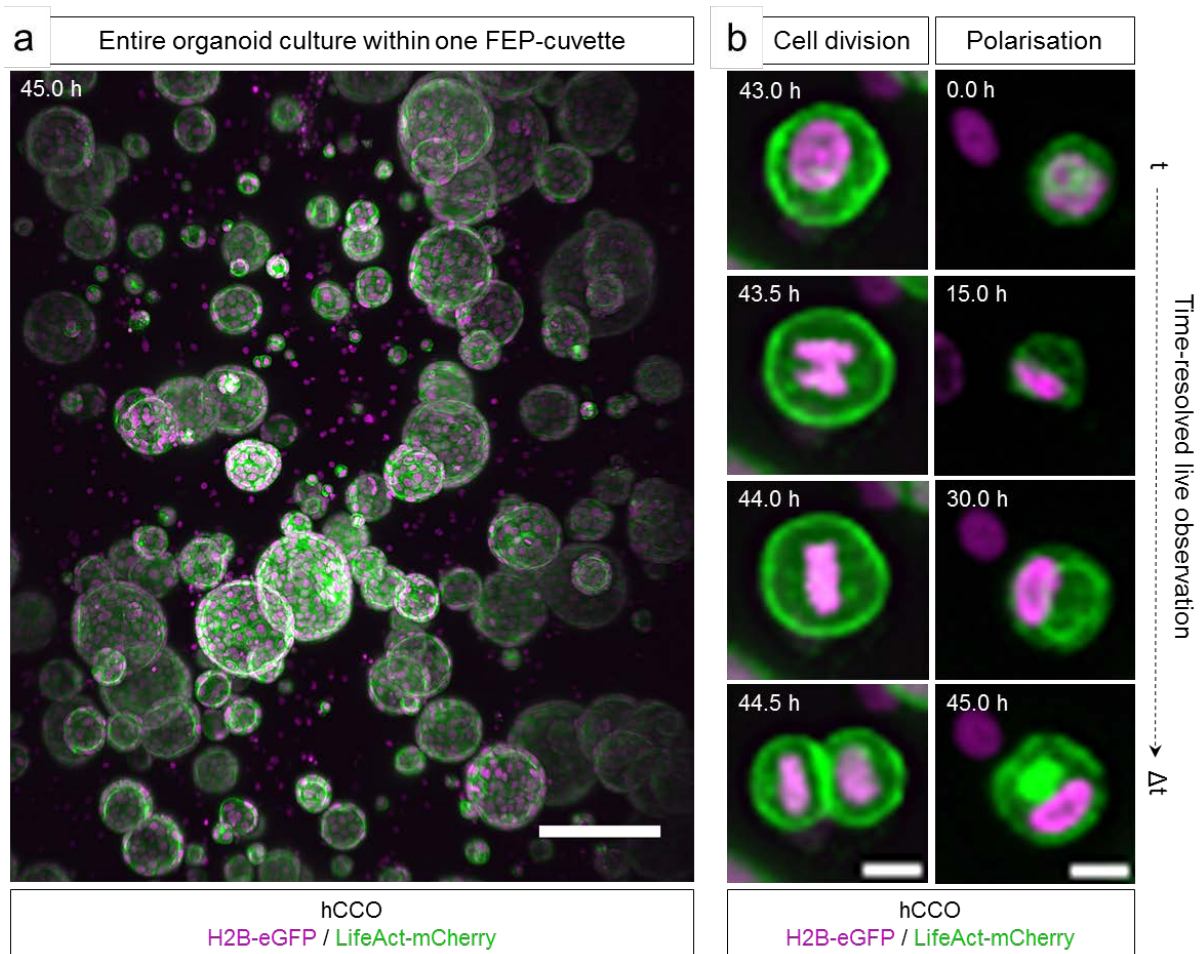

1067

1068 **Supplementary Figure 5: Overview of an entire hCCO culture within one Z1-FEP-cuvette**  
1069 **and observation of isolated single-cell dynamics.** hCCOs expressed the nuclei marker  
1070 H2B-eGFP (magenta) and the F-actin cytoskeletal marker LifeAct-mCherry (green). (a)  
1071 Maximum intensity z-projection of the entire field of view in the Lightsheet Z1 microscope. We  
1072 counted about 120 organoids in this image. Organoids show different sizes and isolated cell  
1073 nuclei are visible in the interspaces. Scale bar: 50 μm. (b) Excerpts of the maximum intensity  
1074 z-projections shown in (a). Isolated single organoid cells show signs of polarisation and  
1075 undergo cell division. Microscope: Zeiss Lightsheet Z.1; objective lenses: detection: W Plan-  
1076 Achromat 20x/1.0, illumination: Zeiss LSM 10x/0.2; laser lines: 488 nm, 561 nm; filters:  
1077 laser block filter (LBF) 405/488/561; voxel size: 1.02 x 1.02 x 2.00 μm<sup>3</sup>; recording interval: 30  
1078 min.

1079

1080

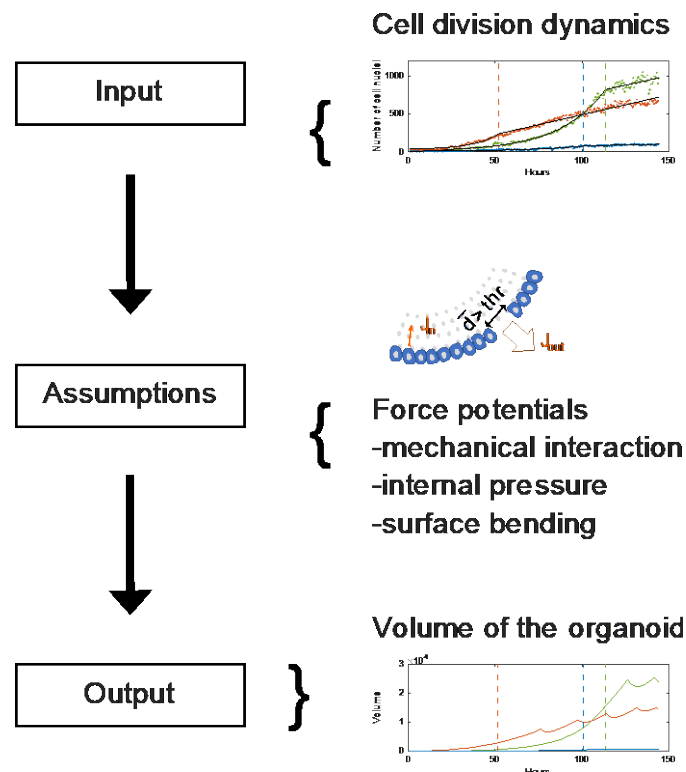

1081  
1082 **Supplementary Figure 6: Illustration of the input, the assumptions and the output of the**  
1083 **model.** Measured cell counts and cell division dynamics are used to initialise the simulations.  
1084 Organoid behaviour is based on the following main assumptions. (1) Each cell produces a  
1085 substance with constant rate  $J_{in}$ , the substance leads to increase of internal pressure. (2) Cell  
1086 displacement is driven by mechanical cell-cell-interactions, internal pressure and a surface  
1087 energy of the organoid. (3) If the organoid shell ruptures, substance is released to the outside  
1088 with flux  $J_{out}$ , releasing pressure and leading to a contraction of the sphere until the cell-cell  
1089 connections are restored. The output of the model is the volume data as a function of time of  
1090 the simulated organoids.

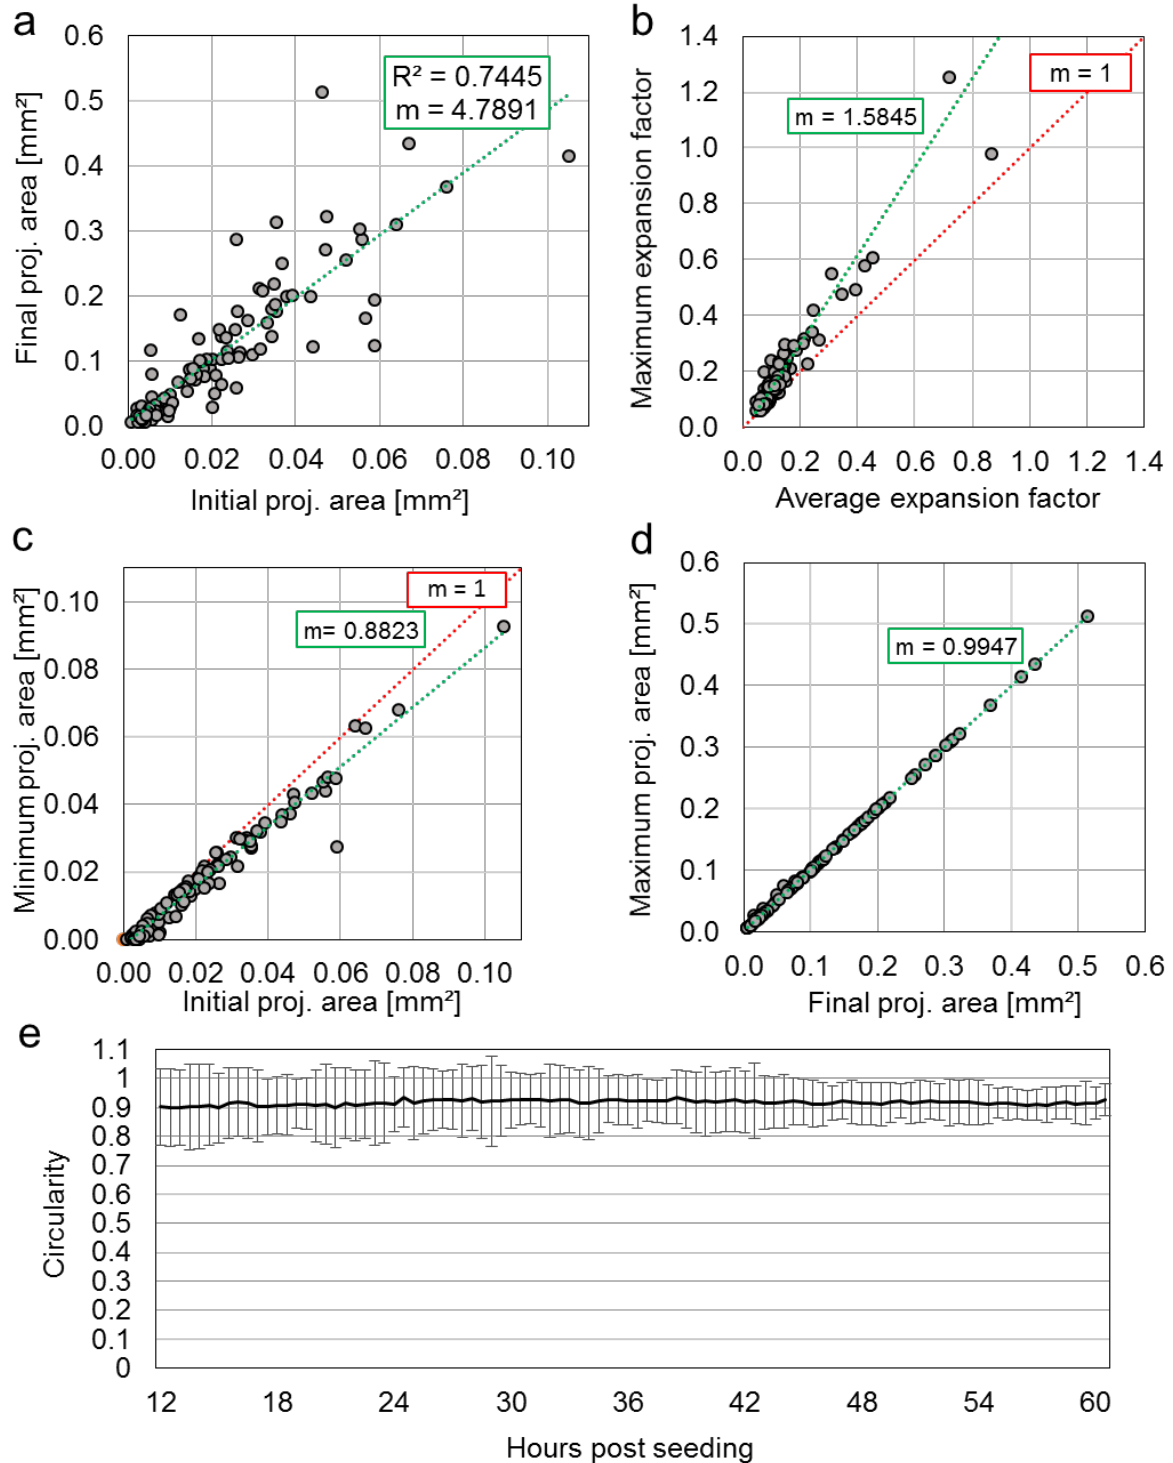

1091

1092

1093

1094

1095

1096

1097

1098

1099

**Supplementary Figure 7: mPO feature extraction using the bright field analysis pipeline.**

(a) The initial and final projected luminal areas correlate positively in healthy mPOs ( $R^2$ -value = 0.7445). (b) The maximum slope of the expansion phases are in average higher than the average slope. (c) The minimum area falls in average slightly below the initial area. (d) Furthermore, the final area equals the maximum area, which indicates continuous growth – green: linear trend line,  $m$ : slope, red:  $f(x) = 1x$ . (e) Average circularity over time of organoids grown in three wells. Average standard deviation estimated within the three wells is indicated. Mathematically possible values range between 0 and 1.

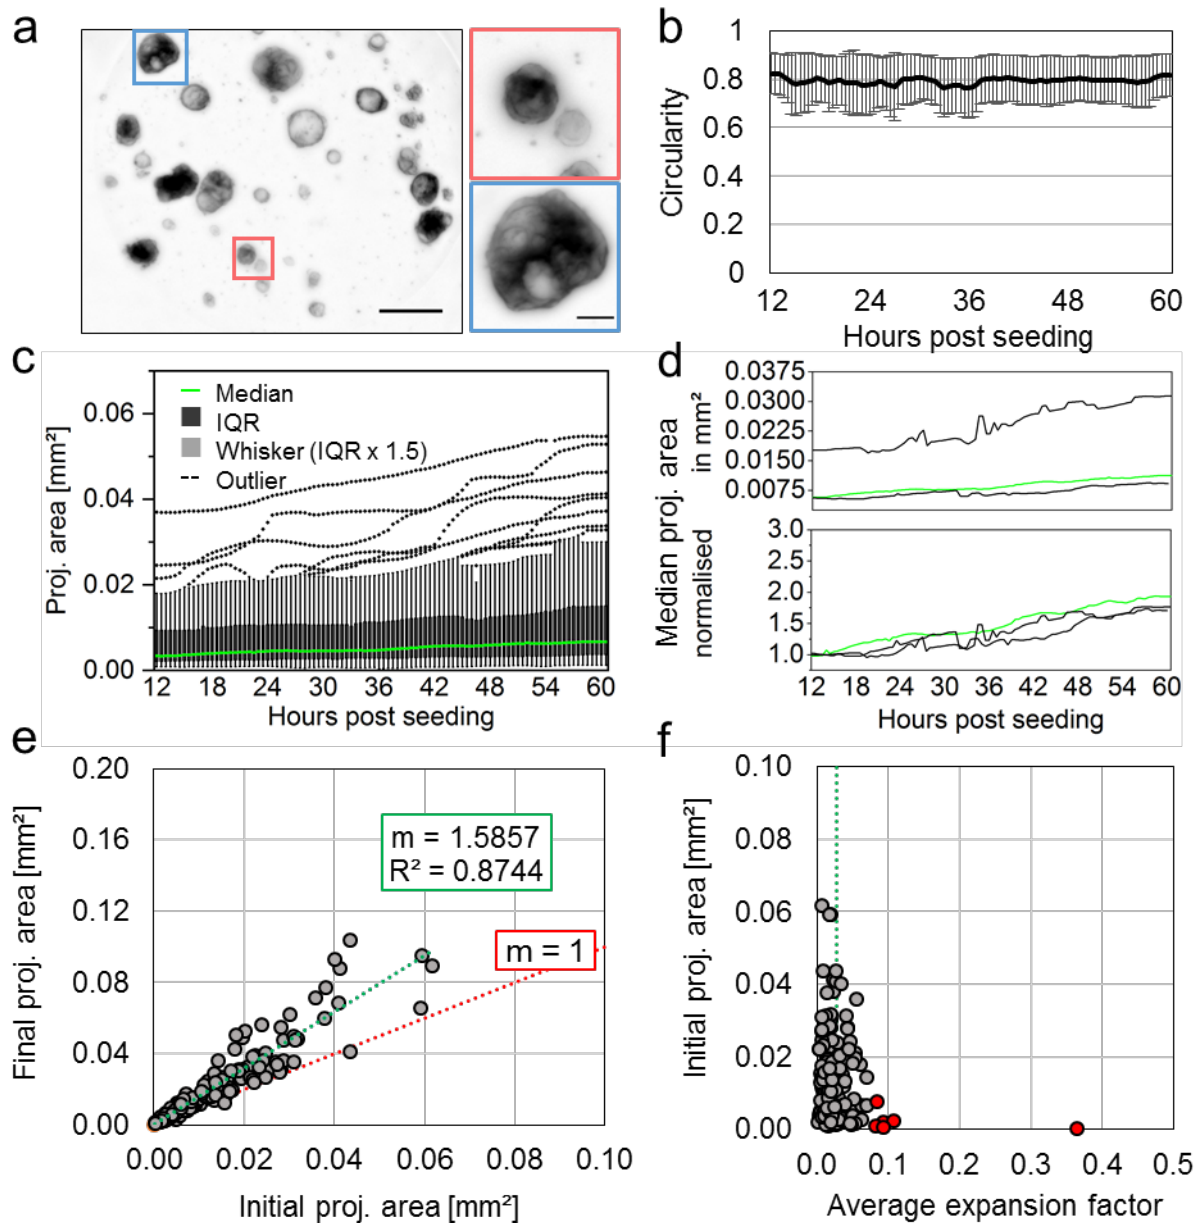

1100

1101 **Supplementary Figure 8: Bright field pipeline allows detailed analysis of polycystic**

1102 **hCCOs.** (a) Polycystic hCCOs display a dense phenotype. Microscope: Zeiss Axio Observer

1103 Z.1; objective lenses: Plan-Apochromat 5x/0.16, avg z-projection, voxel size: 1.29 x 1.29 x

1104 65  $\mu\text{m}^3$ , scale bar overview: 500  $\mu\text{m}$ , close-up: 25  $\mu\text{m}$ . (b) The average circularity is around

1105 0.8 over time. (c) Similarly to monocystic organoid cultures, the detected projected luminal

1106 areas and growth behaviours are heterogeneous. Box plot analysis, median in green (n = 87)

1107 (d) While the median projected luminal areas of three different wells (technical replicates) vary,

1108 the normalised projected area increase is similar (n = 87, 34, 63). (e) The initial projected area

1109 correlates with the final projected area ( $R^2 = 0.8744$ ) with a linear regression slope  $m = 1.5857$ .

1110 (f) The organoids display a similar average expansion factor independent of their initial size

1111 with an average of 0.02 and outliers (red) lying above 0.078.

1112

1113 [Supplementary Tables](#)

1114

1115 **Supplementary Table 1:**

1116 Used settings for the segmentation and post-processing of the data obtained with the light-  
1117 sheet pipeline

| Segmentation settings         |      | Post processing settings |       |
|-------------------------------|------|--------------------------|-------|
| NucleiFilterRange             | 2    | Alpha                    | 150   |
| NucleiThresholdRange          | 10   | OutlierDistanceThreshold | 50    |
| NucleiMeanFactor              | 1    | EdgeDistanceThreshold    | 50    |
| NucleiStandardDeviationFactor | 0    | NucleiMinCount           | 50    |
| NucleiBackgroundFactor        | 0.9  | NucleiMaxCount           | 10000 |
| HoleFillingRange              | 1    |                          |       |
| MaxDetectionRange             | 0.12 |                          |       |
| NucleiSeedDetectionMinRadius  | 1    |                          |       |
| NucleiSeedDetectionMaxRadius  | 4    |                          |       |
| NucleiSeedDilation            | 1    |                          |       |

1118

1119 [Supplementary Movies](#)

1120 **Supplementary Movie 1: Time-resolved observations of epithelial organoids growing in**

1121 **Z1-FEP-cuvettes.** hCCOs expressing H2B-eGFP as nuclei marker (red) and LifeAct-mCherry  
1122 as F-actin cytoskeletal marker (green) and mPOs expressing Rosa26-nTnG (grey) as nuclei  
1123 marker were recorded over 10 hours and 143 hours respectively. The formation of organoids  
1124 from the initially seeded cell clusters, including cell cluster contraction, cell polarisation, lumen  
1125 formation and expansion can be followed. After about 100 hours of observation some mPOs  
1126 begin to display signs of degeneration due to extended culturing without further medium  
1127 exchange. These signs of degeneration include an overall shrinking of the organoid, followed  
1128 by nuclear condensation and fading of the nuclei signal. Microscope: Zeiss Lightsheet Z.1;  
1129 detection objective: W Plan-Apochromat 20x/1.0, illumination objective: Zeiss LSM 10x/0.2;  
1130 laser lines: 488 nm, 561 nm; filters: laser block filter (LBF) 405/488/561; voxel size: 1.02 x 1.02  
1131 x 2.00  $\mu\text{m}^3$ ; recording interval: 30 min; scale bar: 50  $\mu\text{m}$ .

1132

1133 **Supplementary Movie 2: Time-resolved 3D volume rendering of the formation process**

1134 **of an entire organoid culture observed within one Z1-FEP-cuvette.** hCCOs expressing  
1135 H2B-eGFP as nuclei marker (red) and LifeAct-mCherry as F-actin cytoskeletal marker (green)  
1136 were imaged for 5 days. The movie shows an excerpt of the first 10 hours of the recorded data  
1137 set. All organoids within the cuvette were segmented and tracked over these first 10 hours of  
1138 recording. The initial processes of cell cluster contraction, lumen formation and subsequent  
1139 expansion are shown. Depending on the initial cell-cluster size, organoids differ in the time

1140 they need to establish a lumen. Microscope: Zeiss Lightsheet Z.1; detection objective: W Plan-  
1141 Apochromat 20x/1.0, illumination objective: Zeiss LSM 10x/0.2; laser lines: 488 nm, 561 nm;  
1142 filters: laser block filter (LBF) 405/488/561; voxel size: 1.02 x 1.02 x 2.00  $\mu\text{m}^3$ ; recording  
1143 interval: 30 min; 3D rendering and tracking software: Arivis Vision4D.

1144

1145 **Supplementary Movie 3: Time-resolved 3D volume rendering of the fusion process of**  
1146 **two organoids.** hCCOs expressing H2B-eGFP as nuclei marker (red) and LifeAct-mCherry  
1147 as F-actin cytoskeletal marker (green) were recorded in a Z1-FEP-cuvette for 5 days. The  
1148 movie shows an excerpt of the recorded data of 12 hours spanning the fusion process of two  
1149 organoids. The fusion process is visualised by 3D volume rendering of the data acquired for  
1150 the cytoskeletal marker (LifeAct-mCherry – green). After the epithelial monolayers of both  
1151 organoids touch, they begin to form an opening connecting both lumens within one hour. This  
1152 opening then expands while cells migrate into one connected monolayer. Microscope: Zeiss  
1153 Lightsheet Z.1; detection objective: W Plan-Apochromat 20x/1.0, illumination objective: Zeiss  
1154 LSM 10x/0.2; laser lines: 488 nm, 561 nm; filters: laser block filter (LBF) 405/488/561; voxel  
1155 size: 1.02 x 1.02 x 2.00  $\mu\text{m}^3$ ; recording interval: 30 min; 3D rendering software: Arivis Vision4D.

1156

1157 **Supplementary Movie 4: Time-resolved 3D volume rendering of intra-organoid luminal**  
1158 **dynamics.** hCCOs expressing H2B-eGFP as nuclei marker (red) and LifeAct-mCherry as F-  
1159 actin cytoskeletal marker (green) were recorded in a Z1-FEP-cuvette for a total of 132 hours.  
1160 The movie shows data recorded between 84 and 108 hours. Luminal dynamics are visualised  
1161 by 3D volume rendering of the data acquired for the cytoskeletal marker (LifeAct-mCherry –  
1162 green) of a large organoid (diameter:  $\geq 500 \mu\text{m}$ ), presumably formed after fusion of multiple  
1163 organoids. We can follow the formation, subsequent retraction and eventual rupture of duct-  
1164 like structures within the organoid's lumen. Microscope: Zeiss Lightsheet Z.1; detection  
1165 objective: W Plan-Apochromat 20x/1.0, illumination objective: Zeiss LSM 10x/0.2; laser lines:  
1166 488 nm, 561 nm; filters: laser block filter (LBF) 405/488/561; voxel size: 1.02 x 1.02 x 2.00  
1167  $\mu\text{m}^3$ ; recording interval: 30 min; 3D rendering software: Arivis Vision4D.

1168

1169 **Supplementary Movie 5: Time-resolved 3D volume rendering of a growing liver organoid**  
1170 **with cell segmentation and tracking.** hCCOs expressing H2B-eGFP as nuclei marker (red)  
1171 and LifeAct-mCherry as F-actin cytoskeletal marker (green) were recorded in a Z1-FEP-  
1172 cuvette for a total of 132 hours. The movie shows data recorded between 84 and 108 hours.  
1173 Red spheres illustrate tracked cell nuclei and rainbow-coloured lines indicate the travelled  
1174 tracks (colour code: red to blue – timepoint 84 to 108). Single as well as multiple organoid  
1175 tracking is shown. Rotation as well as uni-directional cell movements are visible. Microscope:  
1176 Zeiss Lightsheet Z.1; detection objective: W Plan-Apochromat 20x/1.0, illumination objective:

1177 Zeiss LSM 10x/0.2; laser lines: 488 nm, 561 nm; filters: laser block filter (LBF) 405/488/561;  
1178 voxel size: 1.02 x 1.02 x 2.00  $\mu\text{m}^3$ ; recording interval: 30 min; 3D rendering and tracking  
1179 software: Arivis Vision4D.

1180

1181 **Supplementary Movie 6: Alterations in rotation velocity of neighbouring organoids.**

1182 Video shows two mPOs as an excerpt from an entire culture grown within one Z1-FEP-cuvette.  
1183 The organoids expressed Rosa26-nTnG (grey) as nuclei marker and were imaged over 20  
1184 hours. Beside the differences in nuclei size, both organoids showing different behaviour. Cell  
1185 tracking revealed a rotational motion of the epithelial cell monolayer of the organoid with the  
1186 small roundish nuclei and no rotational motion of the organoid with the big elongated cell nuclei.  
1187 The two organoids are in close contact but do not fuse or interact with each other. Microscope:  
1188 Zeiss Lightsheet Z.1; detection objective: W Plan-Apochromat 20x/1.0, illumination objective:  
1189 Zeiss LSM 10x/0.2; laser lines: 488 nm, 561 nm; filters: laser block filter (LBF) 405/488/561;  
1190 voxel size: 1.02 x 1.02 x 2.00  $\mu\text{m}^3$ ; recording interval: 30 min; 3D rendering and tracking  
1191 software: Arivis Vision4D.

1192

1193 **Supplementary Movie 7: Time-resolved cell tracking during organoid expansion reveals**

1194 **different migration speeds within the epithelial monolayer.** hCCOs expressing H2B-eGFP  
1195 as nuclei marker (red) and LifeAct-mCherry as F-actin cytoskeletal marker (green) recorded in  
1196 a Z1-FEP-cuvette for a total of 132 hours. The movie shows data recorded between 84 and  
1197 108 hours. Image-based segmentation and 3D-rendering revealed that the cells within an  
1198 organoid migrate with different speeds during organoid expansion. Cells at the organoid's  
1199 "poles" tend to show less or slower migration compared to cells located at the organoid's  
1200 equatorial plane (from blue to red: 2-7 $\mu\text{m}$  per hour). Microscope: Zeiss Lightsheet Z.1;  
1201 detection objective: W Plan-Apochromat 20x/1.0, illumination objective: Zeiss LSM 10x/0.2;  
1202 laser lines: 488 nm, 561 nm; filters: laser block filter (LBF) 405/488/561; voxel size: 1.02 x 1.02  
1203 x 2.00  $\mu\text{m}^3$ ; recording interval: 30 min; 3D rendering and tracking software: Arivis Vision4D.

1204

1205 **Supplementary Movie 8: Organoid cell cluster migration prior to organoid formation**

1206 Video shows one mPO as an excerpt of an entire culture grown within one Z1-FEP-cuvette.  
1207 The organoids expressed Rosa26-nTnG (grey) as nuclei marker and were imaged over 20  
1208 hours. Prior to organoid formation, the initially seeded organoid cell cluster migrates through  
1209 the ECM for about 25 hours before the cells rearrange to form a spherical structure. The  
1210 migrated distance is about 250  $\mu\text{m}$  with an average speed of 10  $\mu\text{m}$  (from green/minimum to  
1211 red/maximum: 2.5  $\mu\text{m}/\text{h}$  – 23  $\mu\text{m}/\text{h}$ ). Microscope: Zeiss Lightsheet Z.1; detection objective: W  
1212 Plan-Apochromat 20x/1.0, illumination objective: Zeiss LSM 10x/0.2; laser lines: 488 nm, 561



1213 nm; filters: laser block filter (LBF) 405/488/561; voxel size: 1.02 x 1.02 x 2.00  $\mu\text{m}^3$ ; recording  
1214 interval: 30 min; 3D rendering and tracking software: Arivis Vision4D.

## 1215 [Supplementary Theoretical Considerations](#)

### 1216 **A mechanical model to describe the dynamics of pancreas organoids**

1217 To describe the growth and dynamics of a pancreas organoid, we assume it has a roughly  
1218 spherical shape, with cells forming a monolayer filled with fluid at a different pressure relative  
1219 to the environment. The volume of the organoid is changed by two mechanisms: a) the influx  
1220 of liquid caused by an osmotic imbalance or active pumping, and b) cell division. The first  
1221 mechanism increases the tension between the cells. Cell division, on the other hand, increases  
1222 the surface of the organoid and reduces tension. If the stress is greater than a critical threshold,  
1223 at least one cell connection breaks and leakage occur through the organoid shell. The leakage  
1224 reduces the internal pressure, the monolayer can contract, which in turn allows the ruptured  
1225 cells to reconnect. Subsequently, the whole process can repeat.

1226 A triangulated-network model was used to simulate the membranes as an elastic surface  
1227 consisting of cells. Here, the shell of the organoid is described as an infinitely thin elastic  
1228 surface consisting of hard, spherical beads (the cell's centres) connected by dynamic bonds  
1229 to form a triangulated network.

1230 A spring potential acting on neighbouring beads is used to describe the elasticity of the shell  
1231 and has the typical form

1232

$$1233 \quad U_S = \frac{k_S}{2} \sum_{i,j} (d_{i,j} - r_0)^2,$$

1234

1235 where  $k_S$  is the spring constant,  $d_{i,j}$  is the distance between two neighbouring cells  $i$  and  $j$ ,  
1236 and  $r_0$  is their equilibrium bond length. The spring potential is minimised if  $d_{i,j}$  between two  
1237 neighbouring cells  $i$  and  $j$  corresponds to the equilibrium distance  $r_0$ . Since the method of finite  
1238 elements is used in the simulation, the force must be derived from the potential used. The force  
1239 acting on every cell is given as

1240

$$1241 \quad F_S = -k_S \sum_{k, k \neq i} (d_{i,k} - r_0) e_{i,k},$$

1242

1243 where  $k$  are the indices of the neighbours of the cell  $i$ , and  $e_{i,j}$  is the normalised direction vector  
1244 between  $x_i$  and its neighbour  $x_j$ .

1245

1246 The surface bending energy acts on neighbouring triangles and is minimised when the angle  
1247 between the neighbouring triangles is zero.

1248

$$1249 \quad U_B = k_B(1 - \mathbf{n} \cdot \mathbf{m}),$$

1250

1251 where  $\mathbf{n}$  and  $\mathbf{m}$  are the normal vectors of two neighbouring triangles sharing a common edge  
1252 b. The resulting force can be generated by deriving the bending potential after point  $x_i$ .

1253

$$1254 \quad F_B = k_B \frac{\mathbf{b} \times \mathbf{m}}{|\mathbf{n}|} \left( \hat{\mathbf{1}} - \left[ \frac{\mathbf{b} \times \mathbf{m}}{|\mathbf{n}|^2} \right] \otimes \mathbf{a} \right),$$

1255

1256 where  $\mathbf{a}$  describes the direction vector from  $x_i$  to  $x_j$  in the triangle  $x_i x_j x_k$  and  $\mathbf{a} \otimes \mathbf{b}$  denotes  
1257 the dynamic product of the two vectors  $\mathbf{a}$  and  $\mathbf{b}$ . For one cell  $x_i$  it is then summed over all  $\mathbf{n}, \mathbf{m}$   
1258 pairs of the neighbouring triangles of  $x_i$ . In order to compensate for the differences between  
1259 cells with different numbers of neighbouring cells, a normalisation is made about the number  
1260 of neighbouring cells.

1261 In the simulation, the assumption is made that each cell pumps mass (e.g. water) or fluid  
1262 through an osmotic imbalance into the lumen of the organoid and thus, an internal pressure  
1263 that differs from the external pressure can build up. The internal pressure is one of the factors  
1264 of organoid expansion. The force  $F_p$ , which affects each mass point from the resulting osmotic  
1265 pressure  $\Pi$ , is given as

1266

$$1267 \quad F_p = k_p P A \mathbf{n}_v,$$

1268

1269 whereby

1270

$$1271 \quad A = \frac{1}{3} \sum_{i=1}^{Nb} \frac{1}{2} \mathbf{n}_i.$$

1272

1273 The osmotic pressure  $\Pi$  has an effect on the area  $A$ , which is understood as the sum of the  
1274 adjacent triangular areas to the cell center  $x_i$ , with the direction vector  $\mathbf{n}$  (normal vector to cell  
1275  $i$ = summed normal vectors of the adjacent triangles). The osmotic pressure  $\Pi$  is calculated  
1276 using the van-'t-Hoff law for osmotic pressure

1277

$$1278 \quad \Pi = \frac{n}{V} \cdot i_{vH} \cdot R \cdot T = \frac{n}{V} \cdot const,$$

1279

1280 where  $n$  is the amount of substance,  $i_{vH}$  is the van-'t-Hoff factor,  $R$  is the ideal gas constant  
1281 and  $T$  is the temperature. The volume of the organoid  $V$  is calculated for each time step over  
1282 the convex shell of the cells. The amount of secreted substance changes over time with

1283

$$1284 \quad \frac{dn}{dt} = NJ_{in} - J_{out}n.$$

1285

1286  $N$  indicates the number of cells in the organoid,  $J_{in}$  the amount of substance produced per cell,  
1287 and  $J_{out}$  describes the substance drop through a hole in the organoid shell. If the organoid  
1288 shell has a rupture,  $J_{out}$  is greater than zero, otherwise  $J_{out}$  is zero. The equation of motion  
1289 used in the simulation applies to the overdamped case and contains stochastic fluctuations  $F_t$   
1290 of the cells,

1291

$$1292 \quad \lambda \mathbf{x} = -\nabla U + F_t,$$

1293

1294 whereby the potential  $U$  is given as the sum of the above-mentioned potentials.

1295 Cell division is adjusted to the experimental data, obtained by long-term single cell analysis of  
1296 pancreas-derived organoids, but can easily be adapted to other growth dynamics. If cell  
1297 division takes place a new cell is added to the system in the middle of a random triangle formed  
1298 by three neighbouring cells.

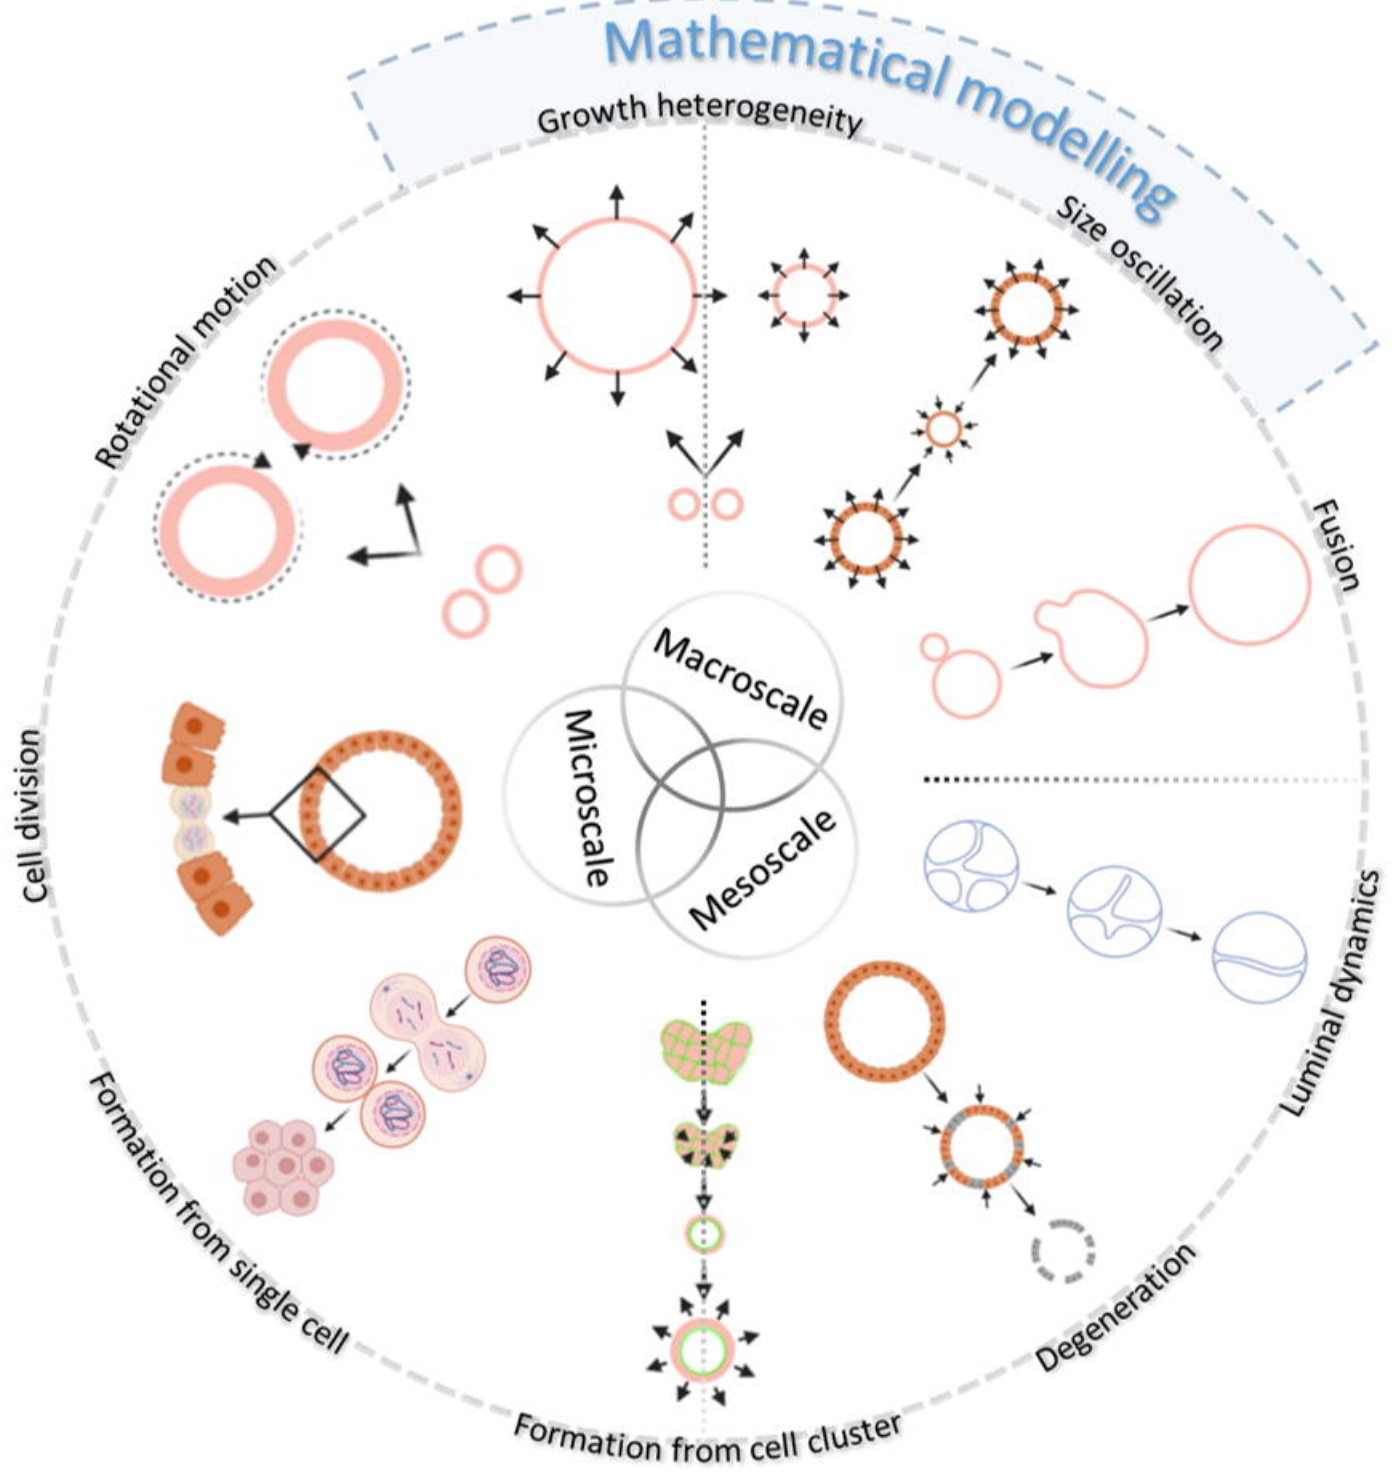

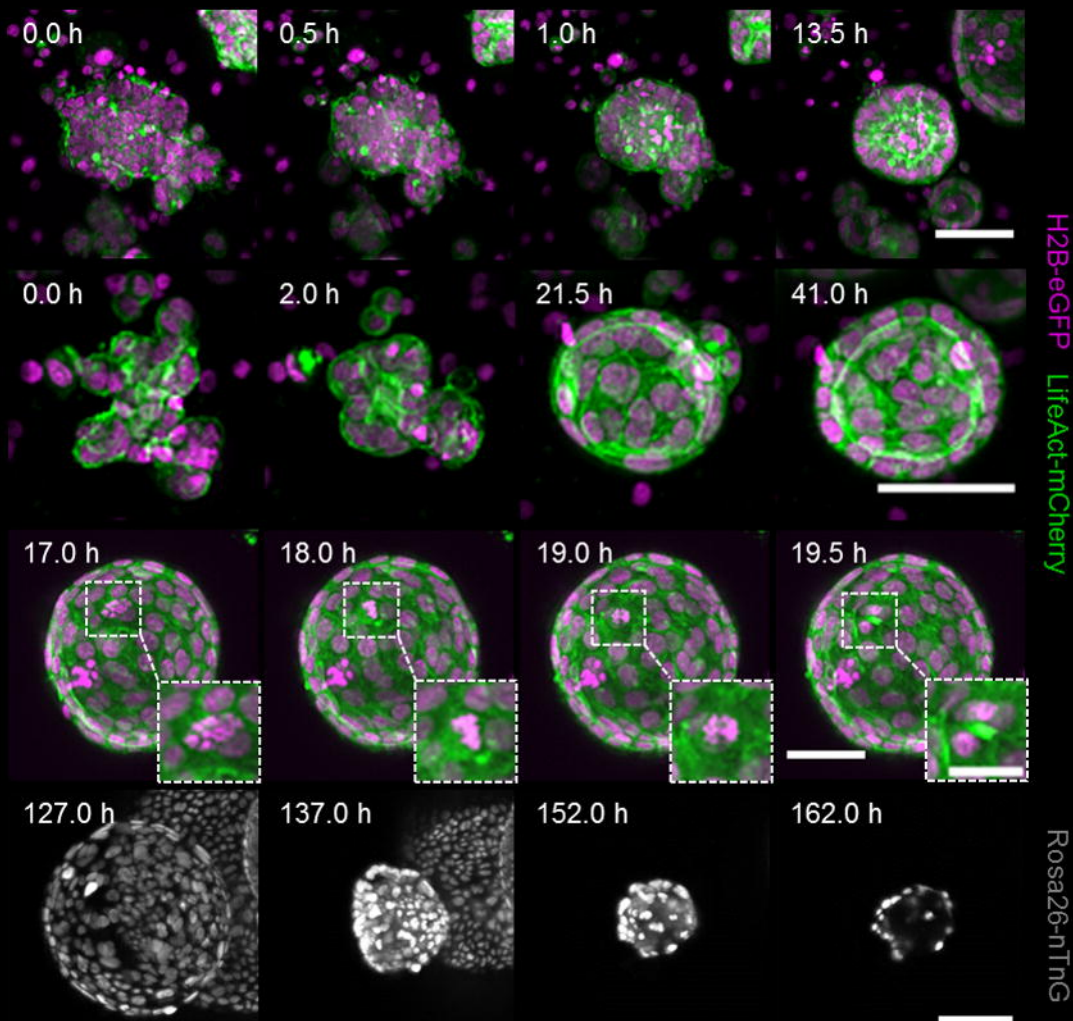

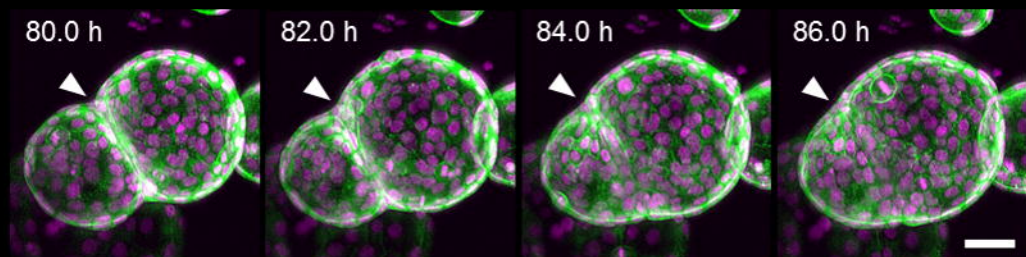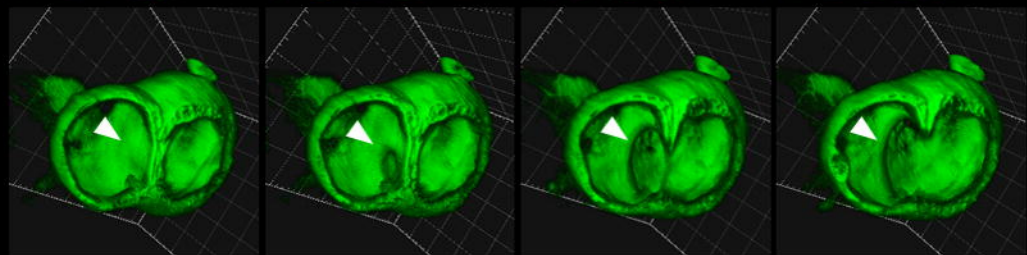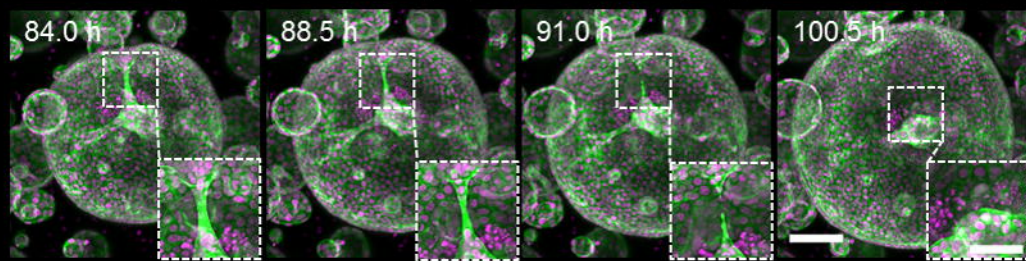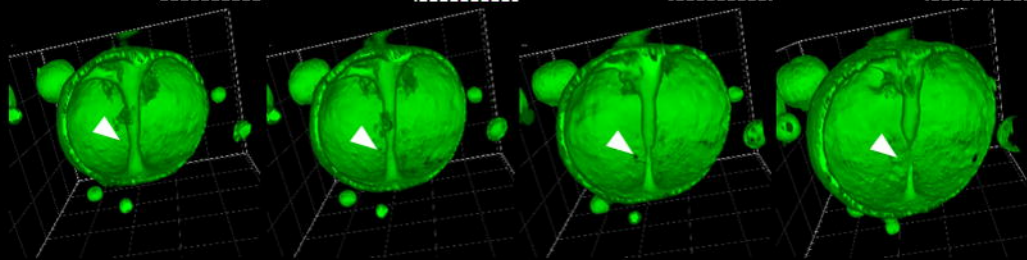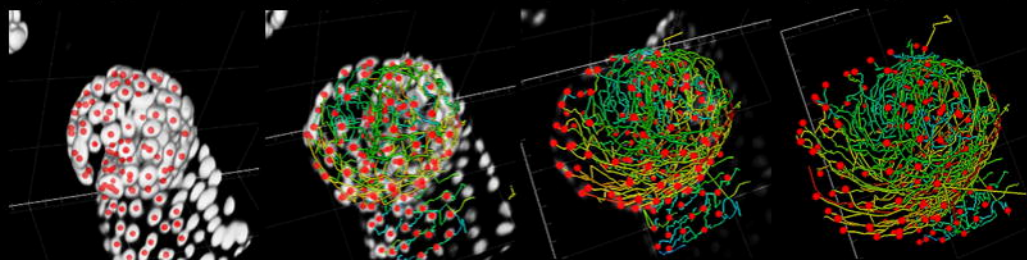

H2B-eGFP    LifeAct-mCherry

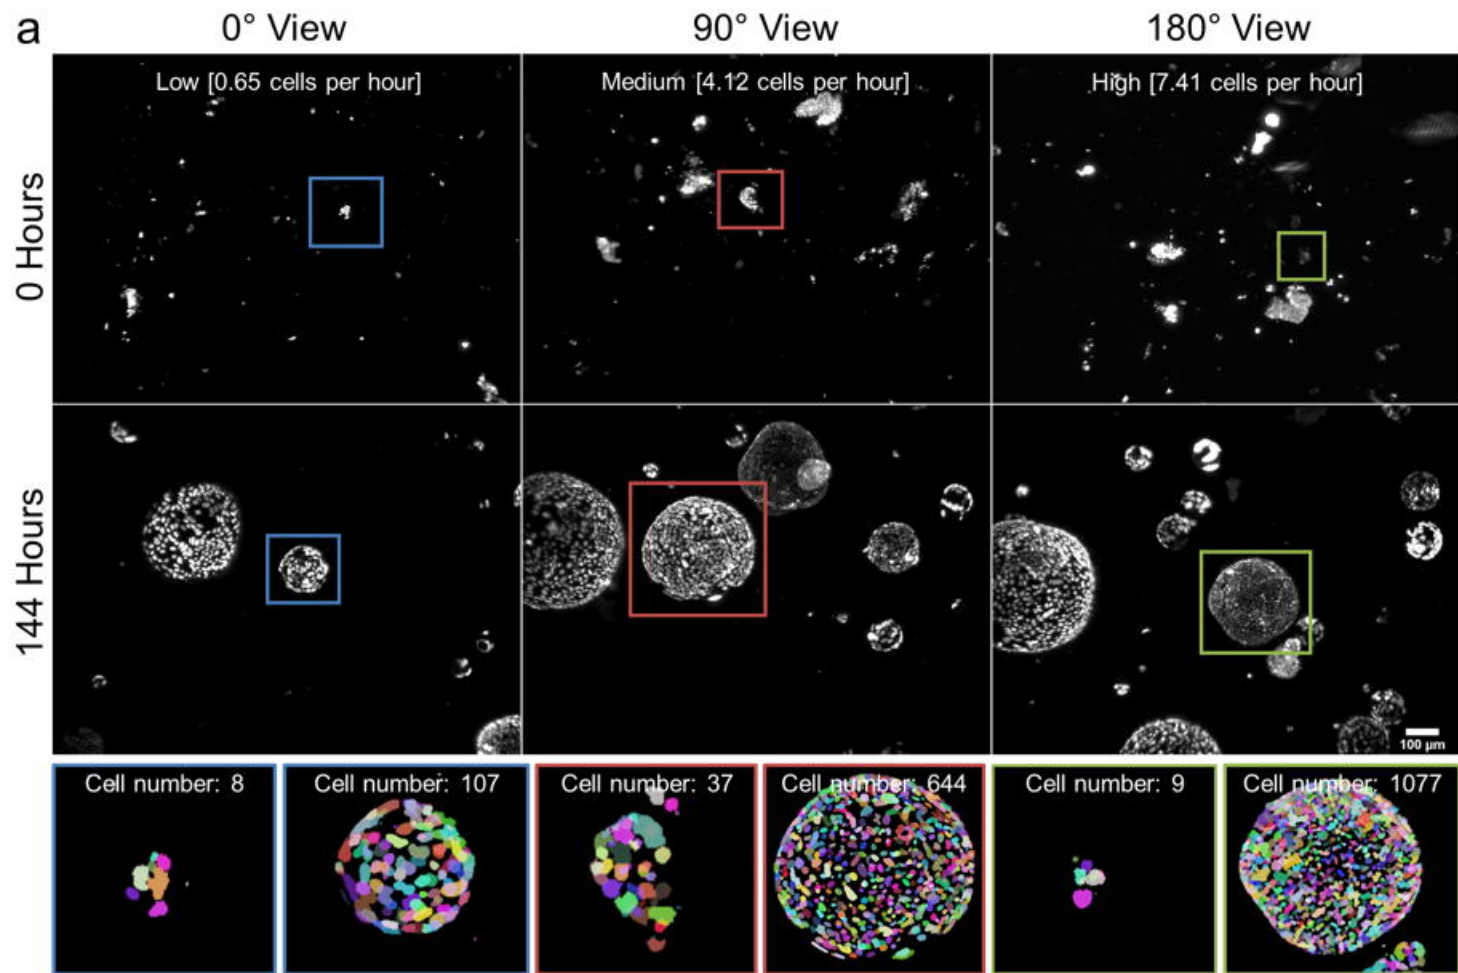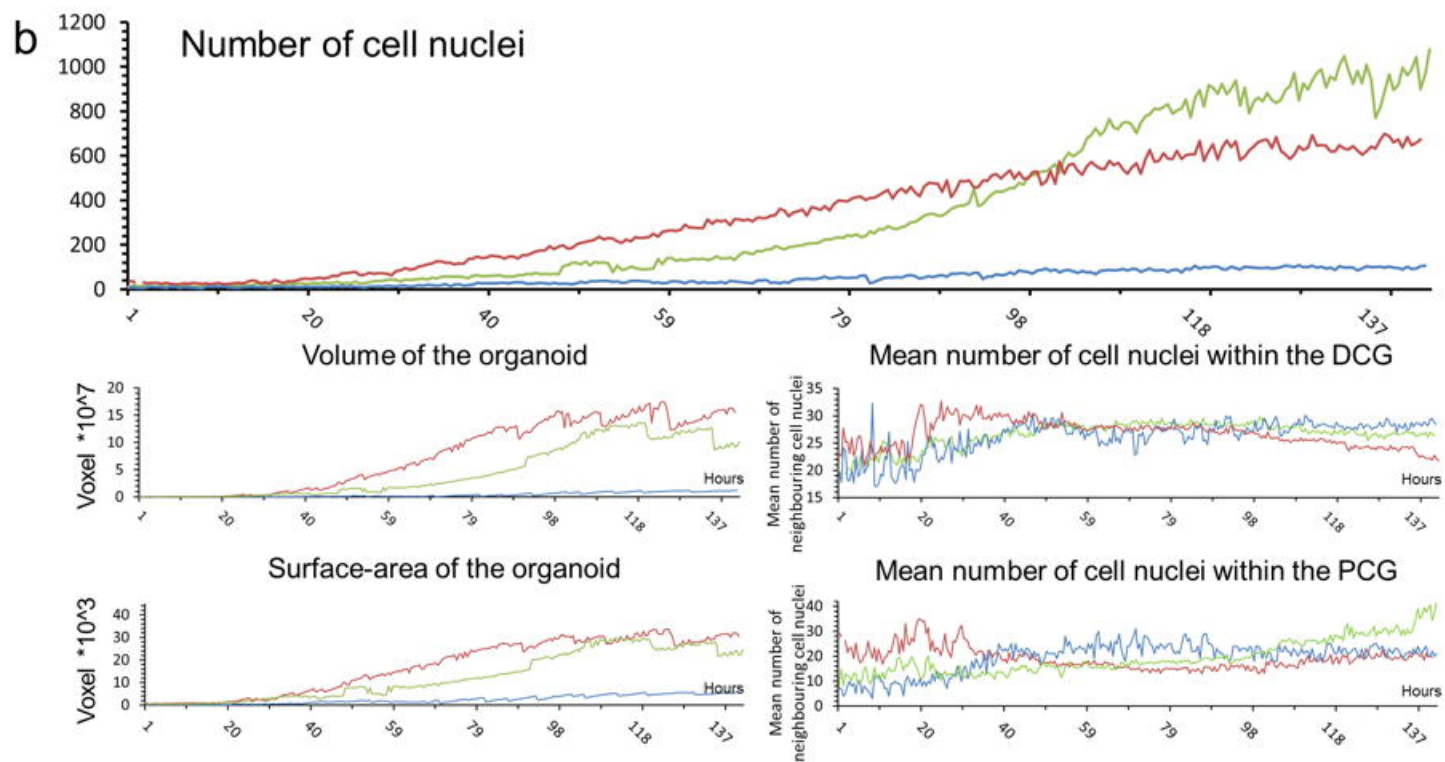

**a**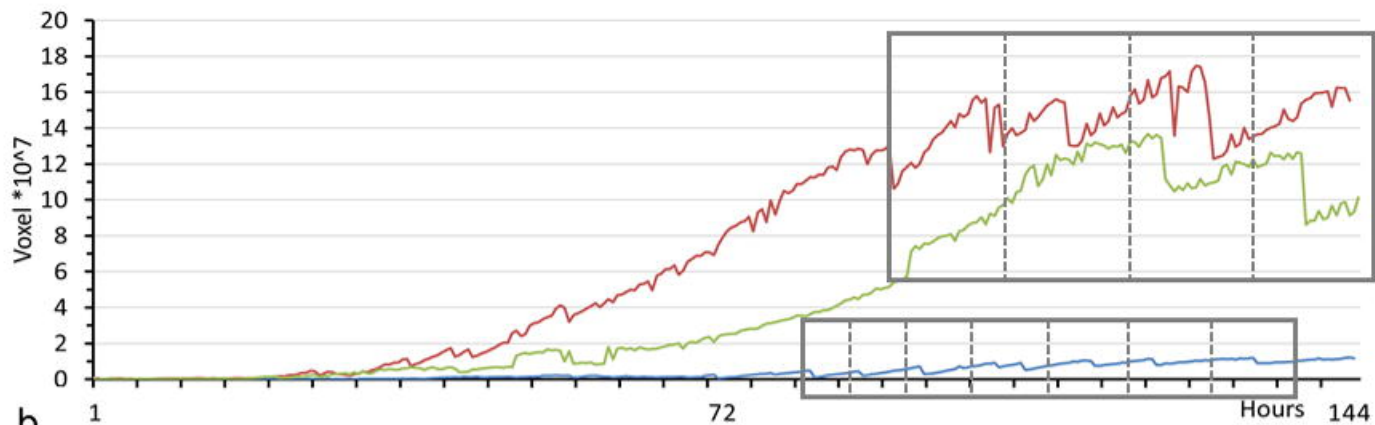**b**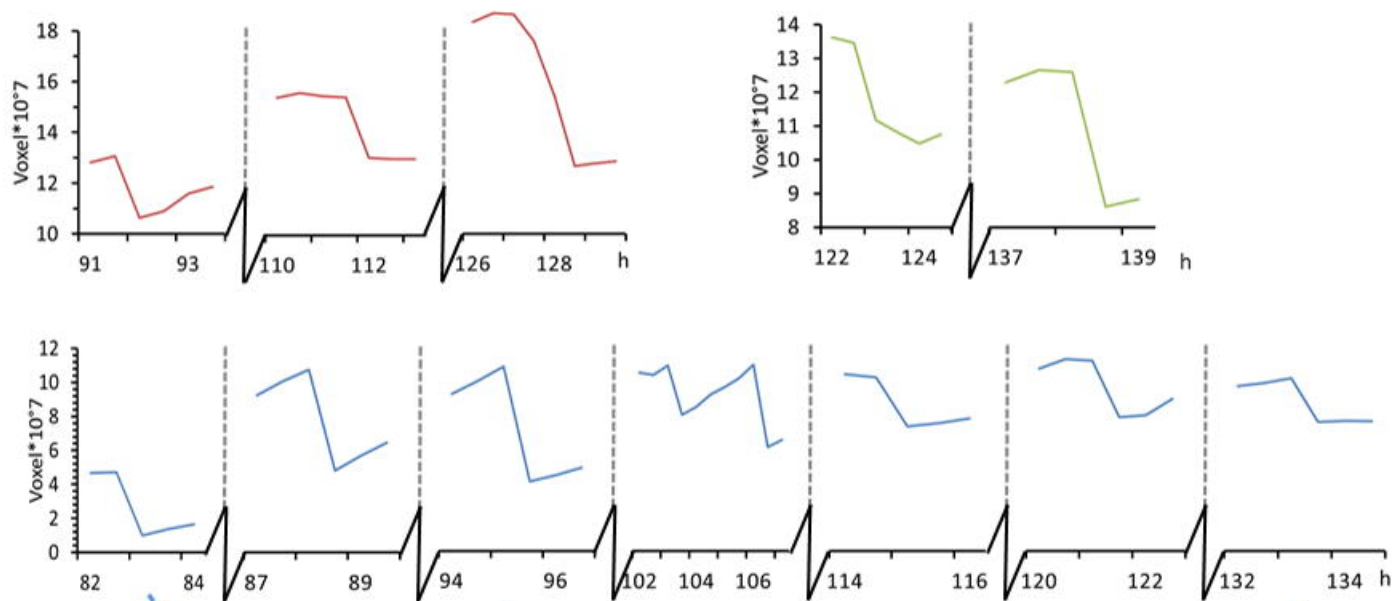**c**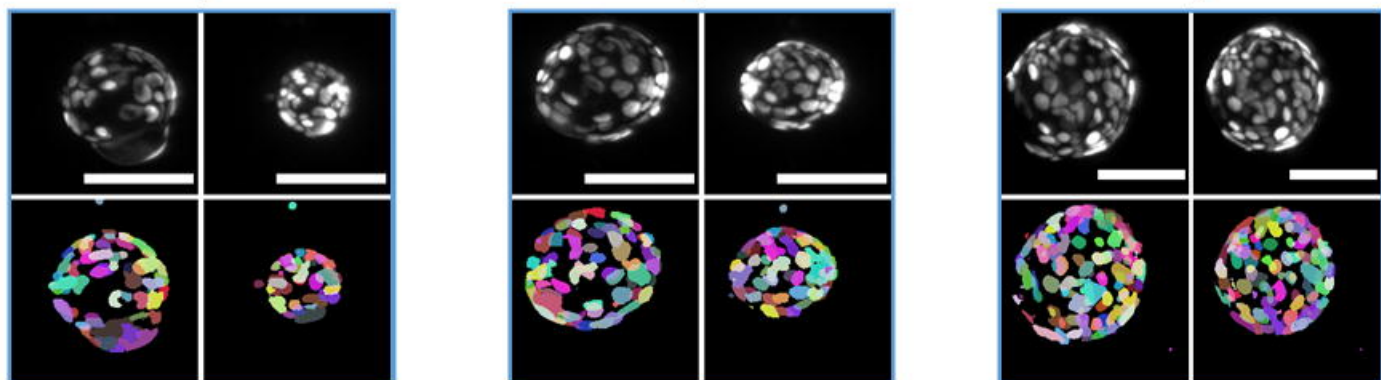



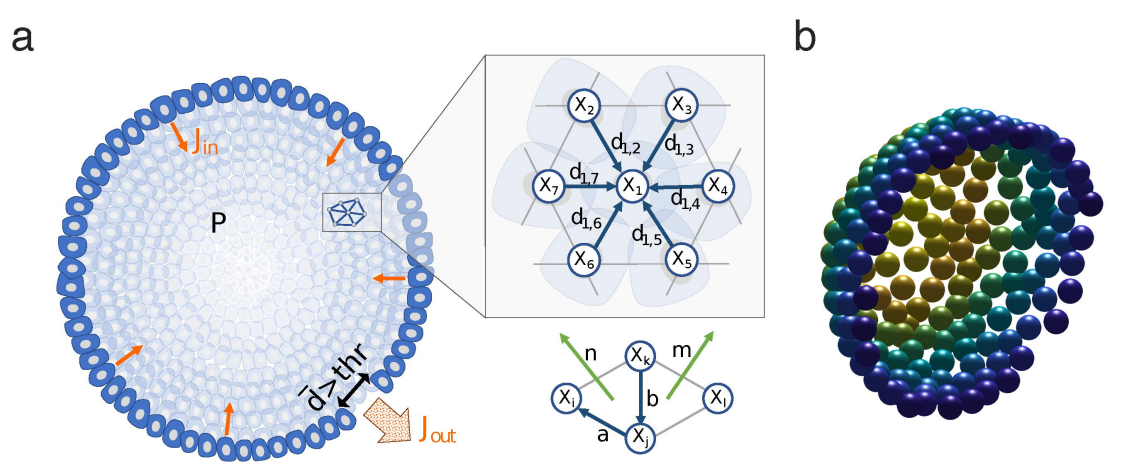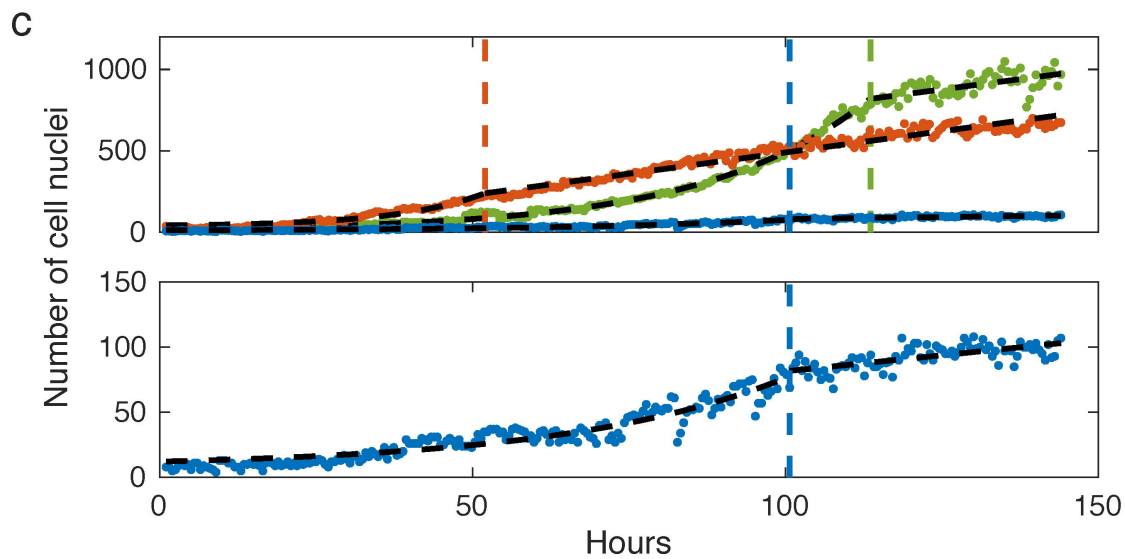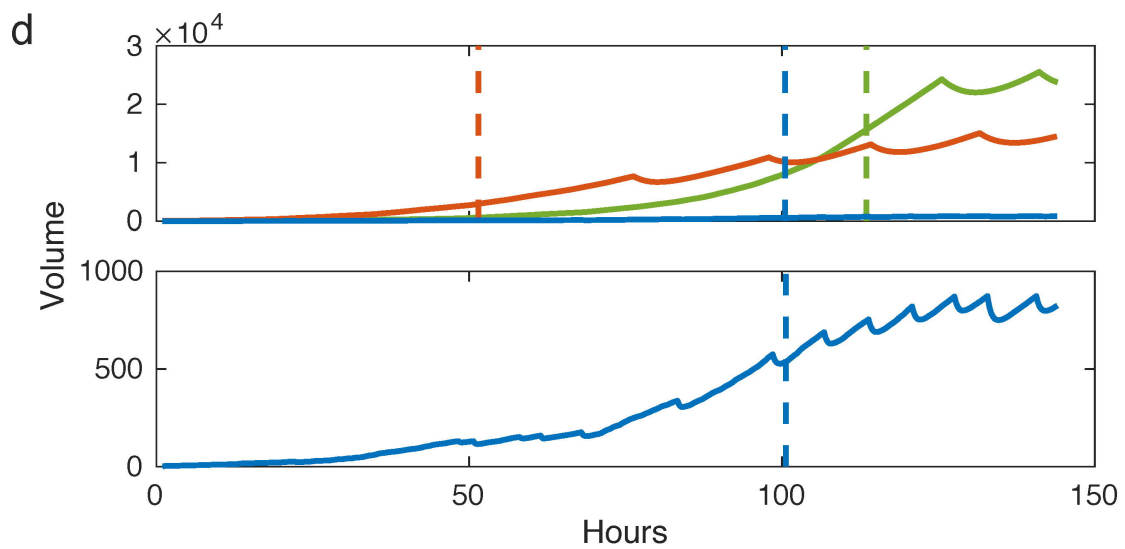

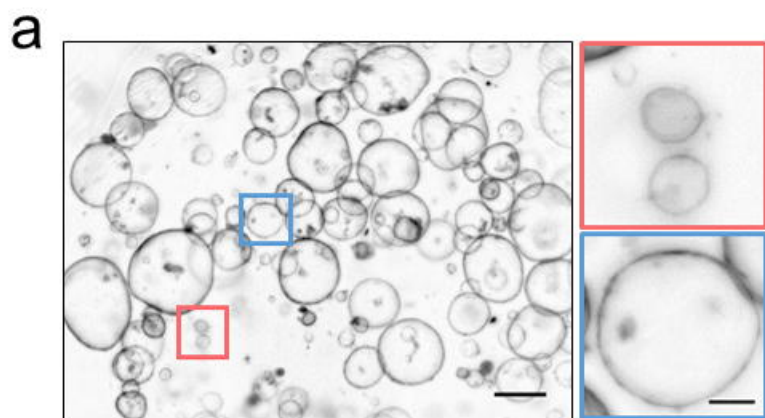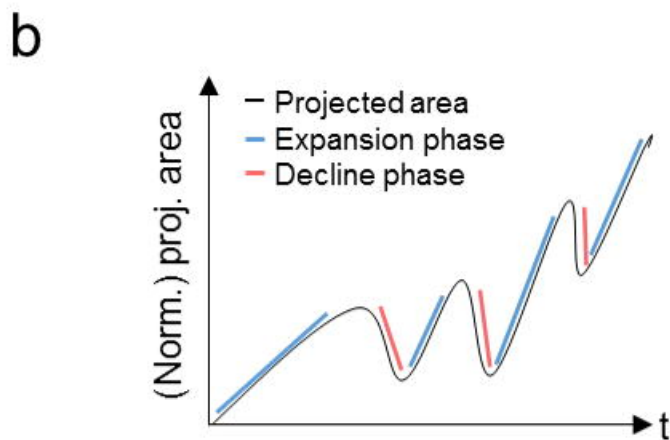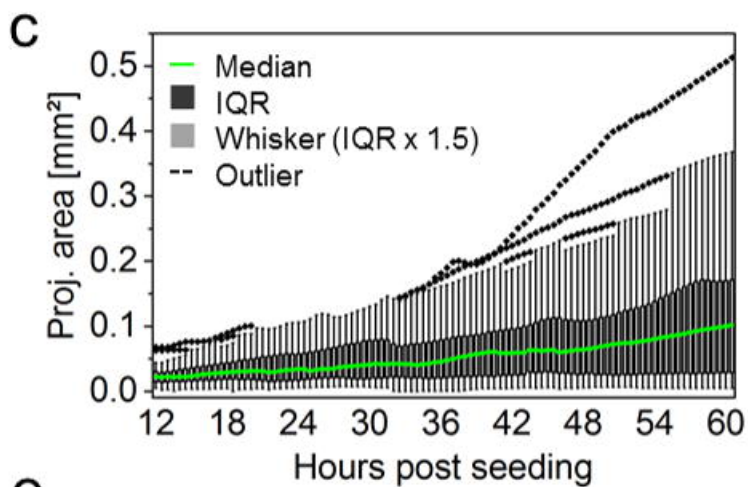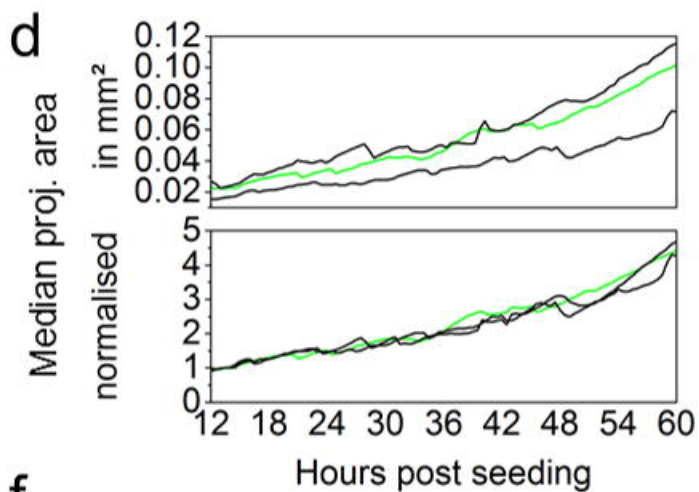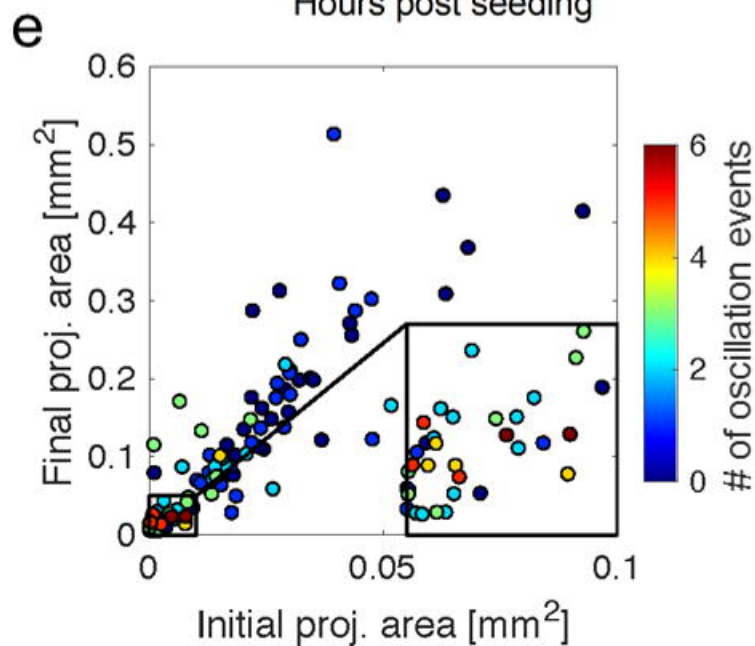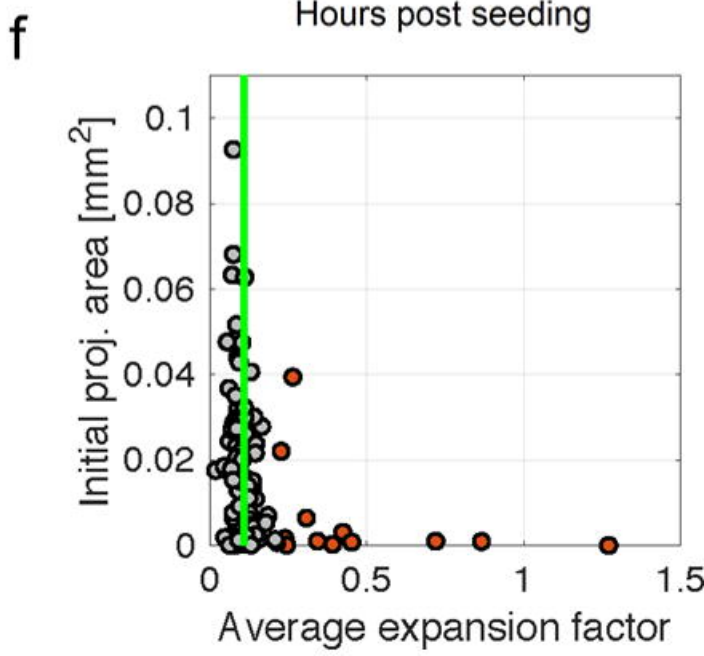

Source: https://www.biorxiv.org/content/biorxiv/early/2020/07/13/2020.07.12.199463.full.pdf
